# Supplementary material
Source: PubMed Central journal article supplement (PMC7108977)
Supplement: NIHMS1062859-supplement-supplement.pdf [file NIHMS1062859-supplement-supplement.pdf]

Supplementary Material for  
Sample size considerations for comparing dynamic treatment  
regimens in a sequential multiple-assignment randomized trial with  
a continuous longitudinal outcome

July 12, 2019

# Contents

|                                                                           |           |
|---------------------------------------------------------------------------|-----------|
| <b>S1 Example Saturated Marginal Structural Mean Models</b>               | <b>3</b>  |
| <b>S2 Correlation Estimators</b>                                          | <b>3</b>  |
| <b>S3 Asymptotic Results</b>                                              | <b>3</b>  |
| <b>S4 Sharp Sample Size Formulae</b>                                      | <b>4</b>  |
| <b>S5 Additional Details Regarding the Generative Model in Appendix C</b> | <b>5</b>  |
| S5.1 Models for Response Status . . . . .                                 | 5         |
| S5.2 Variance . . . . .                                                   | 6         |
| <b>S6 Description of Alternative Simulation Framework</b>                 | <b>7</b>  |
| <b>S7 Additional Simulation Results</b>                                   | <b>9</b>  |
| S7.1 Design I Simulations . . . . .                                       | 12        |
| S7.2 Design II Simulations . . . . .                                      | 30        |
| S7.3 Design III Simulations . . . . .                                     | 48        |
| <b>References</b>                                                         | <b>68</b> |

## List of Tables

|     |                                                                                                         |    |
|-----|---------------------------------------------------------------------------------------------------------|----|
| S1  | General correlation estimators for selected working correlation structures . . . . .                    | 3  |
| S2  | Design effects for sharp sample size formula (S8). . . . .                                              | 5  |
| S3  | Estimated unstructured marginal covariance matrices $\text{Var}(\mathbf{Y}^{(d)})$ by DTR $d$ . . . . . | 8  |
| S4  | Design I simulations: All working assumptions satisfied . . . . .                                       | 12 |
| S5  | Design I simulations: A1(a) violated. . . . .                                                           | 17 |
| S6  | Design I simulations: A1(b) violated. . . . .                                                           | 22 |
| S7  | Design I simulations: A1(c) violated. . . . .                                                           | 24 |
| S8  | Design I simulations: A2 violated. . . . .                                                              | 26 |
| S9  | Design II simulations: All working assumptions satisfied . . . . .                                      | 30 |
| S10 | Design II simulations: A1(a) violated. . . . .                                                          | 34 |
| S11 | Design II simulations: A1(b) violated. . . . .                                                          | 41 |
| S12 | Design II simulations: A1(c) violated. . . . .                                                          | 43 |
| S13 | Design II simulations: A2 violated. . . . .                                                             | 45 |
| S14 | Design III simulations: All working assumptions satisfied . . . . .                                     | 48 |
| S15 | Design III simulations: A1(a) violated. . . . .                                                         | 52 |
| S16 | Design III simulations: A1(b) violated. . . . .                                                         | 60 |
| S17 | Design III simulations: A1(c) violated. . . . .                                                         | 63 |
| S18 | Design III simulations: A2 violated. . . . .                                                            | 64 |

## S1 Example Saturated Marginal Structural Mean Models

We present three generic, saturated models for each of designs I to III. Here, “saturated” means that we model one mean per DTR per stage.

For design I, a saturated marginal structural mean model is of the form

$$\begin{aligned} \mu_t^{(a_1, a_{2R}, a_{2NR})}(\mathbf{X}; \boldsymbol{\theta}) = & \boldsymbol{\eta}^\top \mathbf{X} + \gamma_0 + \mathbb{1}\{t \leq t^*\} (\gamma_1 t + \gamma_2 t a_1) \\ & + \mathbb{1}\{t > t^*\} (\gamma_1 t^* + \gamma_2 t^* a_1 + \gamma_3(t - t^*) + \gamma_4(t - t^*) a_1 + \gamma_5(t - t^*) a_{2R} \\ & + \gamma_6(t - t^*) a_{2NR} + \gamma_7(t - t^*) a_1 a_{2R} + \gamma_8(t - t^*) a_1 a_{2NR}), \end{aligned} \quad (\text{S1})$$

where  $\mathbb{1}_{\{E\}}$  is the indicator function for the event  $E$ .

For design II, a saturated marginal structural mean model is

$$\begin{aligned} \mu_t^{(a_1, a_{2R}, a_{2NR})}(\mathbf{X}; \boldsymbol{\theta}) = & \boldsymbol{\eta}^\top \mathbf{X} + \gamma_0 + \mathbb{1}_{\{t \leq t^*\}} (\gamma_1 t + \gamma_2 a_1 t) \\ & + \mathbb{1}_{\{t > t^*\}} (\gamma_1 t^* + \gamma_2 t^* a_1 + \gamma_3(t - t^*) + \gamma_4(t - t^*) a_1 \\ & + \gamma_5(t - t^*) a_{2NR} + \gamma_6(t - t^*) a_1 a_{2NR}). \end{aligned} \quad (\text{S2})$$

Finally, for design III, a saturated marginal structural mean model is

$$\begin{aligned} \mu_t^{(a_1, a_{2R}, a_{2NR})}(\mathbf{X}; \boldsymbol{\theta}) = & \boldsymbol{\eta}^\top \mathbf{X} + \gamma_0 + \mathbb{1}_{\{t \leq t^*\}} (\gamma_1 t + \gamma_2 a_1 t) \\ & + \mathbb{1}_{\{t > t^*\}} (\gamma_1 t^* + \gamma_2 t^* a_1 + \gamma_3(t - t^*) + \gamma_4(t - t^*) a_1 + \gamma_5(t - t^*) \mathbb{1}\{a_1 = 1\} a_{2NR}). \end{aligned} \quad (\text{S3})$$

## S2 Correlation Estimators

In table S1, we present estimators for within-person correlation  $\rho$  which do not assume that  $\text{Var}(Y_t^{(d)})$  is constant over both time and DTR.

**Table S1:** General correlation estimators for selected working correlation structures.  $d \in \mathcal{D}$  is an embedded DTR,  $W_i^{(d)}$  is shorthand for  $W^{(d)}(A_{1,i}, R_i, A_{2,i})$ , and  $\hat{e}_{i,t}^{(d)}(\hat{\boldsymbol{\theta}})$  is the estimated residual  $Y_{i,t} - \mu_t^{(d)}(\mathbf{X}_i; \hat{\boldsymbol{\theta}})$ .

| Cor. structure | $\text{Cor}(Y_{t_j}^{(d)}, Y_{t_k}^{(d)})$                                        | Estimator                                                                                                                                                                                                                                         |
|----------------|-----------------------------------------------------------------------------------|---------------------------------------------------------------------------------------------------------------------------------------------------------------------------------------------------------------------------------------------------|
| AR(1)          | $\begin{cases} 1 & t_j = t_k \\ (\rho^{(d)})^{ j-k } & t_j \neq t_k \end{cases}$  | $\hat{\rho}^{(d)} = \frac{1}{n(T-1)} \sum_{i=1}^n W_i^{(d)} \sum_{m=1}^{T-1} \frac{\hat{e}_{i,t_m}^{(d)}(\hat{\boldsymbol{\theta}}) \hat{e}_{i,t_{m+1}}^{(d)}(\hat{\boldsymbol{\theta}})}{\hat{\sigma}_{t_m}^{(d)} \hat{\sigma}_{t_{m+1}}^{(d)}}$ |
| Exchangeable   | $\begin{cases} 1 & t_j = t_k \\ \rho^{(d)} & t_j \neq t_k \end{cases}$            | $\hat{\rho}^{(d)} = \frac{1}{n \cdot T(T-1)/2} \sum_{i=1}^n W_i^{(d)} \sum_{l < m} \frac{\hat{e}_{i,t_l}^{(d)}(\hat{\boldsymbol{\theta}}) \hat{e}_{i,t_m}^{(d)}(\hat{\boldsymbol{\theta}})}{\hat{\sigma}_{t_l}^{(d)} \hat{\sigma}_{t_m}^{(d)}}$   |
| Unstructured   | $\begin{cases} 1 & t_j = t_k \\ \rho_{t_j, t_k}^{(d)} & t_j \neq t_k \end{cases}$ | $\hat{\rho}_{t_j, t_k}^{(d)} = \frac{1}{n} \sum_{i=1}^n W_i^{(d)} \frac{\hat{e}_{i,t_j}^{(d)}(\hat{\boldsymbol{\theta}}) \hat{e}_{i,t_k}^{(d)}(\hat{\boldsymbol{\theta}})}{\hat{\sigma}_{t_j}^{(d)} \hat{\sigma}_{t_k}^{(d)}}$                    |

## S3 Asymptotic Results

We show that  $\hat{\boldsymbol{\theta}}$ , the solution to equation (4) over  $\boldsymbol{\theta}$ , is asymptotically consistent for  $\boldsymbol{\theta}^*$ , the true regression parameter.

Define  $\hat{\boldsymbol{\theta}}_n$  to be the solution of the estimating equations

$$\mathbf{0} = \frac{1}{n} \sum_{i=1}^n \sum_{d \in \mathcal{D}} \left[ W^{(d)}(A_{1,i}, R_i, A_{2,i}) \cdot \mathbf{D}^{(d)}(\mathbf{X}_i)^\top \mathbf{V}^{(d)}(\mathbf{X}_i; \boldsymbol{\tau})^{-1} \left( \mathbf{Y}_i - \boldsymbol{\mu}^{(d)}(\mathbf{X}_i; \boldsymbol{\theta}) \right) \right] \quad ((4) \text{ revisited})$$

using data from  $n$  individuals. Let  $\mathbf{Z}_i$  contain the  $i$ th individual's observed covariates (including outcome, treatment assignments, etc.). We can re-write equation (4) as

$$\mathbf{0} = \Psi_n(\boldsymbol{\theta}) = \frac{1}{n} \sum_{i=1}^n \psi_{\boldsymbol{\theta}}(\mathbf{Z}_i), \quad (\text{S4})$$

where

$$\psi_{\boldsymbol{\theta}}(\mathbf{Z}_i) = \sum_{d \in \mathcal{D}} W^{(d)}(A_{1,i}, R_i, A_{2,i}) \cdot \mathbf{D}^{(d)}(\mathbf{X}_i)^\top \mathbf{V}^{(d)}(\mathbf{X}_i; \boldsymbol{\tau})^{-1} \left( \mathbf{Y}_i - \boldsymbol{\mu}^{(d)}(\mathbf{X}_i; \boldsymbol{\theta}) \right).$$

Let  $\hat{\boldsymbol{\theta}}_n$  be a solution to equation (S4) for given  $n$ , and define  $\boldsymbol{\theta}^*$  as the true parameter value, such that  $\boldsymbol{\theta}^*$  is a zero of  $\Psi(\boldsymbol{\theta}) = \mathbb{E}[\psi_{\boldsymbol{\theta}}(\mathbf{Z})]$ .

Assuming the parameter space  $\Theta$  is compact,  $\sup_{\boldsymbol{\theta} \in \Theta} \|\Psi_n(\boldsymbol{\theta}) - \Psi(\boldsymbol{\theta})\| \xrightarrow{P} 0$  by the weak law of large numbers for random functions. If the model  $\boldsymbol{\mu}^{(d)}(\mathbf{X}_i; \boldsymbol{\theta})$  is correctly specified and  $\boldsymbol{\theta}^*$  is the unique solution of  $\Psi(\boldsymbol{\theta}) = \mathbb{E}[\psi_{\boldsymbol{\theta}}(\mathbf{Z})]$ , then consistency follows from standard results for  $M$ -estimation of a location parameter (see, e.g., Keener [2010, theorems 9.2, 9.4, and 9.33]).

We begin establishing asymptotic normality by considering a first-order Taylor expansion of the estimating equations (4) about  $\boldsymbol{\theta}^*$ , assuming continuous differentiability of  $\psi_{\boldsymbol{\theta}}$ :

$$\mathbf{0} = \Psi_n(\hat{\boldsymbol{\theta}}_n) = \Psi_n(\boldsymbol{\theta}^*) + \Psi'_n(\tilde{\boldsymbol{\theta}}) \left( \hat{\boldsymbol{\theta}}_n - \boldsymbol{\theta}^* \right), \quad (\text{S5})$$

where  $\tilde{\boldsymbol{\theta}}$  is some intermediate value between  $\hat{\boldsymbol{\theta}}_n$  and  $\boldsymbol{\theta}^*$ . Note that  $\Psi'_n(\tilde{\boldsymbol{\theta}})$  is a  $p \times p$  matrix, where  $p$  is the dimension of  $\boldsymbol{\theta}$ . If  $\Psi'_n(\tilde{\boldsymbol{\theta}})$  is non-singular, equation (S5) can be re-written as

$$\sqrt{n} \left( \hat{\boldsymbol{\theta}}_n - \boldsymbol{\theta}^* \right) = -\sqrt{n} \Psi'_n(\tilde{\boldsymbol{\theta}})^{-1} \Psi_n(\boldsymbol{\theta}^*). \quad (\text{S6})$$

By the central limit theorem,  $\sqrt{n} \Psi_n(\boldsymbol{\theta}^*) \Rightarrow \mathcal{N}(\mathbf{0}, \text{Var}(\psi_{\boldsymbol{\theta}}(\mathbf{Z})))$ .

Under sufficient regularity conditions (see, e.g., van der Vaart [1998, theorem 5.41]), and because  $\tilde{\boldsymbol{\theta}} \xrightarrow{P} \boldsymbol{\theta}^*$ , we have  $-\Psi'_n(\tilde{\boldsymbol{\theta}}) \xrightarrow{P} -\mathbb{E}[\psi'_{\boldsymbol{\theta}}(\mathbf{Z})]$ .

Define  $\mathbf{B} = \mathbb{E}[\psi'_{\boldsymbol{\theta}}(\mathbf{Z})]$  and  $\mathbf{M} = \text{Var}(\psi_{\boldsymbol{\theta}}(\mathbf{Z})) = \mathbb{E}[\psi_{\boldsymbol{\theta}}(\mathbf{Z})^{\otimes 2}]$ . By Slutsky's theorem and the delta method, we have

$$\sqrt{n} \left( \hat{\boldsymbol{\theta}}_n - \boldsymbol{\theta}^* \right) \Rightarrow \mathcal{N}(\mathbf{0}, \mathbf{B}^{-1} \mathbf{M} \mathbf{B}^{-1}). \quad (\text{S7})$$

This completes the proof.

## S4 Sharp Sample Size Formulae

The sample size formulae developed in the main text are upper bounds on sharper formulae presented here. Working assumptions A1 and A2 are still needed to obtain these sharp formulae, as is the restriction to three timepoints and piecewise-linear models, examples of which are in section S1. These formulae arise directly from derivations as in appendix B.

**Table S2:** Design effects for sharp sample size formula (S8).

| Design | Form of $DE_{\text{sharp}}$                                                                            |
|--------|--------------------------------------------------------------------------------------------------------|
| I      | $(1 - \rho^2) - \frac{(1 - \rho)\rho^2}{2(1 + \rho)}$                                                  |
| II     | $\frac{(1 - \rho) \left( \rho^2 + 4\rho - \frac{1}{2}(r_1 + r_{-1})(2\rho + 1) + 2 \right)}{1 + \rho}$ |
| III    | $\frac{(1 - \rho) (2\rho^2 + (3 - r_1)(1 + 2\rho))}{2(1 + \rho)}$                                      |

The sharp formulae have a similar structure to the conservative one presented in formula (10), but the usual design effect and deflation factor due to the longitudinal observations are not separable into distinct terms. Rather, the sharp formulae are expressed as follows:

$$n \geq \frac{4 \left( z_{1-\alpha/2} + z_{1-\beta} \right)^2}{\delta^2} \cdot DE_{\text{sharp}}, \quad (\text{S8})$$

where  $DE$  is defined as in table S2.

Notice that for each design,  $DE_{\text{sharp}} \leq (1 - \rho^2) \cdot DE$ , where  $DE_{\text{sharp}}$  is as defined in table 3.

## S5 Additional Details Regarding the Generative Model in Appendix C

Here we provide additional technical details about the generative model presented in appendix C. In particular, we provide a more complete description of the response models  $R_+$  and  $R_-$ , as well as details of how variance was computed so as to correctly marginalize over response status.

### S5.1 Models for Response Status

Potential response status for both first-stage treatment options is generated as

$$R_i^{(a_1)} = g_{a_1} \left( Y_{1,i}^{(a_1)} \right),$$

where  $g_{a_1} : \mathbb{R} \rightarrow \{0, 1\}$ . Define  $r_{a_1} := P(R_i^{(a_1)} = 1)$ . In table 4, we consider three possible response models. In the first, which we denote “ $R_{\perp}$ ”,  $g_{a_1}(Y_1^{(a_1)}) = X$ , where  $X \sim \text{Bernoulli}(r_{a_1})$  is independent of  $Y_0$  and  $Y_1^{(a_1)}$ . We do not believe this is a realistic model for response; however, we consider it an important comparative scenario.

Under the second response model, “ $R_+$ ”,  $g_{a_1}(Y_{1,i}^{(a_1)}) = X_i^{(a_1)}$ , where  $X_i^{(a_1)} \sim \text{Bernoulli}(r_{a_1,i}^+)$ , where  $r_{a_1,i}^+ = P(R_i^{(a_1)} = 1)$  increases with  $Y_{1,i}^{(a_1)}$ .  $r_{a_1,i}^+$  are generated from a  $\text{Beta}(r_{a_1}/(1 - r_{a_1}), 1)$  distribution, where  $r_{a_1}$  is the desired average probability of response.

To compute  $r_{a_1,i}^+$ , we center and standardize  $Y_{1,i}^{(a_1)}$  with respect to the (known) true mean and standard deviation, then apply an inverse-cumulative distribution function transformation:

$$r_{a_1,i}^+ = F_{a_1}^{\leftarrow} \left( \Phi \left( \frac{Y_{1,i}^{a_1} - \mu_1^{(a_1)}}{\sigma} \right) \right),$$

where  $F_{a_1}^{\leftarrow}$  is the inverse CDF of the  $\text{Beta}(r_{a_1}/(1-r_{a_1}), 1)$  distribution. This ensures that  $E[r_{a_1,i}^+] = r_{a_1}$ , and that all response probabilities are bounded on the interval  $(0, 1)$ . This model is designed to mimic scenarios in which the tailoring variable is closely related to  $Y_1$  and “response” is associated with *high* values of  $Y_1$ .

Similarly, for the final response model considered in table 4, “ $R_-$ ”,  $g_{a_1}(Y_{1,i}^{(a_1)}) = X_i^{(a_1)}$ , where  $X_i^{(a_1)} \sim \text{Bernoulli}(r_{a_1,i}^-)$ , where  $r_{a_1,i}^-$  is negatively correlated with  $Y_{1,i}^{(a_1)}$ :

$$r_{a_1,i}^- = F_{a_1}^{\leftarrow} \left( 1 - \Phi \left( \frac{Y_{1,i}^{a_1} - \mu_1^{(a_1)}}{\sigma} \right) \right).$$

This model is designed to mimic scenarios in which the tailoring variable is closely related to  $Y_1$  and “response” is associated with *low* values of  $Y_1$ .

## S5.2 Variance

Recall that, in our generative model, the second-stage response-conditional error  $\epsilon_2^{(d)}(R^{(a_1^{(d)})})$  follows a  $\mathcal{N}(0, v^{(d)}(R^{(a_1^{(d)})}))$  distribution, where

$$\begin{aligned} v^{(d)}(x) &= \text{Var} \left( Y_2^{(d)} \mid R^{(a_1)} = x \right) - \text{Var} \left( c_0 Y_0 + c_1 Y_1^{(a_1)} \mid R^{(a_1)} = x \right) \\ &= \left( \omega_x^{(d)} \right)^2 - \text{Var} \left( c_0 Y_0 + c_1 Y_1^{(a_1)} \mid R^{(a_1)} = x \right); \end{aligned} \quad (\text{S9})$$

$\omega_x^{(d)}$  is the standard deviation of  $Y_2^d$  given response status  $x$ . Subtracting  $\text{Var} \left( c_0 Y_0 + c_1 Y_1^{(a_1)} \mid R^{(a_1)} = x \right)$  in equation (S9) is necessary to account for the variation introduced into  $Y_{2,i}^{(d)} \mid R^{(a_1)}$  by constructing it as a function of previously-observed outcomes.

By the law of total variance,

$$\sigma^2 = r_{a_1} \left( \omega_1^{(d)} \right)^2 + (1 - r_{a_1}) \left( \omega_0^{(d)} \right)^2 + r_{a_1} (1 - r_{a_1}) \left( \Delta_2^{(d)} \right)^2, \quad (\text{S10})$$

where  $\Delta_2^{(d)} = E[Y_2^{(d)} \mid R^{(a_1)} = 1] - E[Y_2^{(d)} \mid R^{(a_1)} = 0]$ . There exist infinite choices of  $\omega_0^{(d)}$  and  $\omega_1^{(d)}$  that satisfy equation (S10). To generate data, we fix responders’ variances and compute non-responders’ variances by solving for  $\omega_0^{(d)}$  in equation (S10) in order to achieve a given marginal variance  $\sigma^2$ . For designs II and III, we set the variances for all responders; for design I, without loss of generality, we fix only the variances of responders for whom  $A_{2R,i} = A_{1,i}$  (i.e., boxes C and H in figure 1).

Under reasonable response-generation mechanisms (i.e., not  $R_{\perp\perp}$ ), we were unable to derive closed-form expressions for  $E[Y_2^{(d)} \mid R^{(a_1)} = x]$  and  $\text{Var}(c_0 Y_0 + c_1 Y_1^{(a_1)} \mid R^{(a_1)} = x)$ ,  $x = 0, 1$ . As such, these values are computed numerically for each simulation scenario using a simulated data set containing 200,000 observations. These estimates are then used as the “true” values in the generative models when simulating scenarios in table 4.

As mentioned in section 5.2, the generative model described above induces bounds on the choice of  $\omega_1^{(d)}$ . In order to achieve  $v^{(d)}(j) > 0$  for all  $d \in \mathcal{D}$  and  $j \in \{0, 1\}$ , we need

$$\begin{aligned} \left( \omega_1^{(d)} \right)^2 &\geq \max \left\{ \text{Var} \left( c_0 Y_0 + c_1 Y_1^{(a_1)} \mid R^{(a_1)} = 1 \right), \right. \\ &\quad \left. (1 - r_{a_1}) \left( \left( \Delta_2^{(d)} \right)^2 - \left( \Delta_2^{(d)} \right)^2 + \text{Var} \left( c_0 Y_0 + c_1 Y_1^{(a_1)} \mid R^{(a_1)} = 1 \right) \right) \right\} \end{aligned} \quad (\text{S11})$$

and

$$\left(\omega_1^{(d)}\right)^2 \leq \frac{1}{r_{a_1}}\sigma^2 - (1 - r_{a_1}) \max \left\{ \left(\Delta_2^{(d)}\right)^2, \left(\Delta_2^{(d')}\right)^2 \right\} - \frac{1 - r_{a_1}}{r_{a_1}} \text{Var} \left( c_0 Y_0 + c_1 Y_1^{(a_1)} \mid R^{(a_1)} = 1 \right), \quad (\text{S12})$$

where  $d$ , and  $d' \in \mathcal{D}$  is a second DTR that recommends the same first-stage treatment as  $d$ , i.e.,  $a_1^{(d)} = a_1^{(d')}$ . In table 4, a dagger ( $\dagger$ ) indicates that, in that scenario, we were not able to find a parameterization of the generative model in which the upper bound (S12) is larger than the lower bound (S11).

In table S3, we provide unstructured estimates of  $\text{Var}(Y^{(d)})$  not averaged over DTR. For designs I and III, the target structure is

$$\begin{pmatrix} 64 & 19.2 & 19.2 \\ 19.2 & 64 & 19.2 \\ 19.2 & 19.2 & 64 \end{pmatrix}.$$

For design II, the target structure is

$$\begin{pmatrix} 36 & 10.8 & 10.8 \\ 10.8 & 36 & 10.8 \\ 10.8 & 10.8 & 36 \end{pmatrix}.$$

The differences are due to how  $\sigma^2$  was set to achieve a standardized effect size of  $\delta = 0.3$ . The true correlation is  $\rho = 0.3$ ; the response rate is 0.4 for both first-stage treatments, and the response model used is  $R_+$ .

## S6 Description of Alternative Simulation Framework

In addition to the data-generative process described in appendix C, we employ a second process to violate working assumption A1(c). When data are generated sequentially according to appendix C, we cannot derive a closed-form expression for  $\text{Cov} \left( Y_t^{(d)}, Y_{t_T}^{(d)} \mid R^{(a_1)} \right)$ , as is required to control violation of working assumption A1(c). Therefore, in scenarios in which we violate working assumption A1(c), we use the alternative generative process described below. Note that, in this model, we by default employ the  $R_{\perp\perp}$  definition of response.

Data were generated as follows:

1. Draw  $A_1$  from  $\{-1, 1\}$  with equal probability.
2. For each subset of participants, generate  $R$  from a Bernoulli( $r_{A_1}$ ) distribution.
3. Draw  $A_2$  from  $\{-1, 1\}$  with equal probability for those participants who are re-randomized (e.g., for all participants in design I but only for non-responders in design II).
4. For each participant, generate  $\mathbf{Y} \in \mathbb{R}^{T \times 1}$  such that  $\mathbf{Y} = \boldsymbol{\nu}^{(A_1, R, A_2)}(\boldsymbol{\gamma}, \boldsymbol{\lambda}) + \boldsymbol{\epsilon}^{(A_1, R, A_2)}$ , where  $\boldsymbol{\epsilon}^{(A_1, R, A_2)} \sim \mathcal{N}_T(\mathbf{0}, \boldsymbol{\Sigma}^{(A_1, R, A_2)})$ ; we define  $\boldsymbol{\Sigma}^{(A_1, R, A_2)}$  below.

The estimands of primary interest are marginal over response to first-stage treatment; however, the simulation framework described above uses generative models which are conditional on response to first-stage treatment. Here, we describe how to derive conditional quantities which, when averaged over response, yield the desired marginal characteristics.



**Table S3:** Estimated unstructured marginal covariance matrices  $\text{Var}(\mathbf{Y}^{(d)})$  by DTR  $d$  for  $\delta = 0.3$  and  $\rho = 0.3$  with  $r_1 = r_{-1} = 0.4$  under  $R_+$ . All working assumptions are satisfied. The ‘‘Pooled over DTR’’ entry is the mean of all DTR-specific estimates; ‘‘Exchangeable Est.’’ is the estimated matrix when the true correlation structure is assumed exchangeable and constant across DTRs, and estimated as such.

| Design                                                                                         | DTR ( $\mathbf{a}_1, \mathbf{a}_{2R}, \mathbf{a}_{2NR}$ )                                      |                                                                                                |                                                                                                         |                                                                                                         |
|------------------------------------------------------------------------------------------------|------------------------------------------------------------------------------------------------|------------------------------------------------------------------------------------------------|---------------------------------------------------------------------------------------------------------|---------------------------------------------------------------------------------------------------------|
|                                                                                                | (1, 1, 1)                                                                                      | (1, 1, -1)                                                                                     | (1, -1, 1)                                                                                              | (1, -1, -1)                                                                                             |
| design I                                                                                       | $\begin{pmatrix} 64.1 & 19.3 & 17.5 \\ 19.3 & 64.0 & 13.1 \\ 17.5 & 13.1 & 59.3 \end{pmatrix}$ | $\begin{pmatrix} 63.9 & 19.4 & 17.5 \\ 19.4 & 63.8 & 13.2 \\ 17.5 & 13.2 & 59.5 \end{pmatrix}$ | $\begin{pmatrix} 64.2 & 19.4 & 20.3 \\ 19.4 & 63.9 & 22.4 \\ 20.3 & 22.4 & 63.4 \end{pmatrix}$          | $\begin{pmatrix} 64.0 & 19.5 & 20.4 \\ 19.5 & 63.7 & 22.5 \\ 20.4 & 22.5 & 63.7 \end{pmatrix}$          |
|                                                                                                | $\begin{pmatrix} 63.5 & 19.2 & 18.5 \\ 19.2 & 64.0 & 16.5 \\ 18.5 & 16.5 & 63.6 \end{pmatrix}$ | $\begin{pmatrix} 63.6 & 19.3 & 20.2 \\ 19.3 & 63.8 & 22.7 \\ 20.2 & 22.7 & 63.4 \end{pmatrix}$ | $\begin{pmatrix} 63.7 & 19.2 & 18.6 \\ 19.2 & 63.9 & 16.6 \\ 18.6 & 16.6 & 63.7 \end{pmatrix}$          | $\begin{pmatrix} 63.9 & 19.3 & 20.3 \\ 19.3 & 63.7 & 22.7 \\ 20.3 & 22.7 & 63.5 \end{pmatrix}$          |
|                                                                                                | Pooled over DTR                                                                                | Exchangeable Est.                                                                              |                                                                                                         |                                                                                                         |
|                                                                                                | $\begin{pmatrix} 63.9 & 19.3 & 19.1 \\ 19.3 & 63.8 & 18.7 \\ 19.1 & 18.7 & 62.5 \end{pmatrix}$ | $\begin{pmatrix} 63.4 & 18.9 & 18.9 \\ 18.9 & 63.4 & 18.9 \\ 18.9 & 18.9 & 63.4 \end{pmatrix}$ |                                                                                                         |                                                                                                         |
|                                                                                                | <hr/>                                                                                          |                                                                                                |                                                                                                         |                                                                                                         |
| design II                                                                                      | $\begin{pmatrix} 35.9 & 10.9 & 10.9 \\ 10.9 & 35.8 & 11.1 \\ 10.9 & 11.1 & 35.9 \end{pmatrix}$ | $\begin{pmatrix} 35.9 & 10.9 & 10.5 \\ 10.9 & 35.9 & 9.3 \\ 10.5 & 9.3 & 35.8 \end{pmatrix}$   | $\begin{pmatrix} 35.9 & 10.9 & 11.6 \\ 10.9 & 35.8 & 13.4 \\ 11.6 & 13.4 & 35.8 \end{pmatrix}$          | $\begin{pmatrix} 36.0 & 10.9 & 10.9 \\ 10.9 & 35.9 & 10.6 \\ 10.9 & 10.6 & 35.9 \end{pmatrix}$          |
|                                                                                                | $\begin{pmatrix} 35.9 & 10.9 & 11.0 \\ 10.9 & 35.9 & 11.1 \\ 11.0 & 11.1 & 35.8 \end{pmatrix}$ | $\begin{pmatrix} 35.9 & 10.9 & 10.9 \\ 10.9 & 35.9 & 10.9 \\ 10.9 & 10.9 & 35.9 \end{pmatrix}$ |                                                                                                         |                                                                                                         |
|                                                                                                | Pooled over DTR                                                                                | Exchangeable Est.                                                                              |                                                                                                         |                                                                                                         |
|                                                                                                | <hr/>                                                                                          |                                                                                                |                                                                                                         |                                                                                                         |
|                                                                                                | design III                                                                                     | $\begin{pmatrix} 63.8 & 19.6 & 19.0 \\ 19.6 & 63.7 & 18.2 \\ 19.0 & 18.2 & 63.5 \end{pmatrix}$ | $\begin{pmatrix} 63.84 & 19.33 & 20.81 \\ 19.33 & 63.70 & 24.32 \\ 20.81 & 24.32 & 63.47 \end{pmatrix}$ | $\begin{pmatrix} 63.92 & 19.38 & 20.03 \\ 19.38 & 63.61 & 21.24 \\ 20.03 & 21.24 & 63.83 \end{pmatrix}$ |
| $\begin{pmatrix} 63.9 & 19.4 & 19.9 \\ 19.4 & 63.7 & 21.3 \\ 19.9 & 21.3 & 63.6 \end{pmatrix}$ |                                                                                                | $\begin{pmatrix} 63.8 & 20.0 & 20.0 \\ 20.0 & 63.8 & 20.0 \\ 20.0 & 20.0 & 63.8 \end{pmatrix}$ |                                                                                                         |                                                                                                         |
| Pooled over DTR                                                                                |                                                                                                | Exchangeable Est.                                                                              |                                                                                                         |                                                                                                         |
| <hr/>                                                                                          |                                                                                                |                                                                                                |                                                                                                         |                                                                                                         |
| <hr/>                                                                                          |                                                                                                |                                                                                                |                                                                                                         |                                                                                                         |

We first describe the conditional mean models used to generate  $\mathbf{Y}$  in step 4. For all designs, the conditional mean model used is

$$\nu_t^{(A_1, R, A_{2R})}(\boldsymbol{\gamma}, \boldsymbol{\lambda}) = \mu_t^{(A_1, R, A_{2R}, (1-R) \cdot A_{2NR})}(\boldsymbol{\gamma}) + \mathbb{1}_{\{t > t^*\}}(t - t^*)(R - r_{A_1})(\lambda_1 + \lambda_2 A_1), \quad (\text{S13})$$

where  $\mu_t^{(A_1, R, A_{2R}, (1-R) \cdot A_{2NR})}(\boldsymbol{\gamma})$  is the design-specific marginal mean model (see the supplement for examples). Notice the absence of  $\mathbf{X}$ ; since our sample size formulae do not account for baseline covariates, we omit them for our simulations. Denote by  $\boldsymbol{\nu}^{(A_1, R, A_{2R})}(\boldsymbol{\gamma}, \boldsymbol{\lambda})$  the length- $T$  vector which has  $j^{\text{th}}$  element  $\nu_{t_j}^{(A_1, R, A_{2R})}(\boldsymbol{\gamma}, \boldsymbol{\lambda})$ .

In equation (S13), we can interpret  $\lambda_1$  as the average difference in “second-stage intercept” between responders and non-responders to the same first-stage treatment. Similarly, we can view  $\lambda_2$  as the average difference in “second-stage intercept” between responders and non-responders to opposite first-stage treatments. Together,  $\boldsymbol{\gamma}$  and  $\boldsymbol{\lambda}$  completely specify all conditional means for each design which, by construction, are guaranteed to average over response to  $\mu_t^{(a_1, a_{2R}, a_{2NR})}(\boldsymbol{\gamma})$  for all  $t > t^*$ .

It remains to compute conditional variance matrices  $\boldsymbol{\Sigma}^{(A_1, R, A_2)}$ . As with the mean models, these conditional covariance matrices must account for the design of the SMART, which may suggest constraints on the possible forms  $\boldsymbol{\Sigma}^{(A_1, R, A_2)}$  can take (see section 3.1 or Lu et al. [2016]). In particular, the “conditional” variances of  $Y_0$  and  $Y_1$  are exactly the marginal variances, since response has not yet been observed. Under working assumption A2, we have

$$\boldsymbol{\Sigma}^{(A_1, R, A_2)} = \begin{bmatrix} \sigma^2 & \rho\sigma^2 & \sigma\rho_{02}^{(A_1, R, A_2)}\sigma_2^{(A_1, R, A_2)} \\ \rho\sigma^2 & \sigma^2 & \sigma\rho_{12}^{(A_1, R, A_2)}\sigma_2^{(A_1, R, A_2)} \\ \sigma\rho_{02}^{(A_1, R, A_2)}\sigma_2^{(A_1, R, A_2)} & \sigma\rho_{12}^{(A_1, R, A_2)}\sigma_2^{(A_1, R, A_2)} & \left(\sigma_2^{(A_1, R, A_2)}\right)^2 \end{bmatrix},$$

We assume, for simplicity in our generative model, that  $\rho_{02}^{(A_1, R, A_2)} = \rho_{12}^{(A_1, R, A_2)} = \rho^{(A_1, R, A_2)}$  for all  $A_1$ ,  $R$ , and  $A_2$ . Given these quantities for responders, i.e.,  $\sigma_2^{(A_1, 1, A_2)}$  and  $\rho^{(A_1, 1, A_2)}$ , we can find appropriate values for the non-responders such that the conditional variance matrices marginalize correctly. By the law of total variance, we have

$$\left(\sigma_2^{(A_1, 0, A_2)}\right)^2 = \frac{1}{1 - r_{A_1}} \cdot \left(\sigma^2 - r_{A_1} \left(\sigma_2^{(A_1, 1, A_2)}\right)^2\right) - r_{A_1} \left(\nu_2^{A_1, 1, A_2}(\boldsymbol{\gamma}, \boldsymbol{\lambda}) - \nu_2^{A_1, 0, A_2}(\boldsymbol{\gamma}, \boldsymbol{\lambda})\right)^2.$$

Similarly, by the law of total covariance, we have

$$\rho^{(A_1, 0, A_2)} = \frac{\rho\sigma - r_{A_1}\rho^{(A_1, 1, A_2)}\sigma_2^{(A_1, 1, A_2)}}{(1 - r_{A_1})\sigma_2^{(A_1, 0, A_2)}}.$$

This fully specifies the data generative model discussed above.

## S7 Additional Simulation Results

In the following pages, we present additional simulation results for the curious reader. We explore multiple definitions of response  $R_i^{(a_1)} = g_{a_1} \left( Y_{1,i}^{(a_1)} \right)$  and the performance of the sharp sample size formula (S8). We also present diagnostic measures such as coverage of  $z$ -based 95% confidence intervals.

For each of designs I to III, we consider the scenarios presented in table 4. See appendix C for details on how data for each scenario were generated.

## Response Definitions

We consider the following definitions of response:

- $\mathbf{R}_{\perp}$ :  $g_{a_1}(Y_{1,i}^{(a_1)}) = X_i^{(a_1)}$ , where  $X_i^{(a_1)} \sim \text{Bernoulli}(r_{a_1})$  is independent of all other observed data.
- $\mathbf{R}_+$ :  $g_{a_1}(Y_{1,i}^{(a_1)}) = X_i^{(a_1)}$ , where  $X_i^{(a_1)} \sim \text{Bernoulli}(r_{a_1,i}^+)$ , where  $r_{a_1,i}^+$  is positively correlated with  $Y_{1,i}^{(a_1)}$ .
- $\mathbf{R}_-$ :  $g_{a_1}(Y_{1,i}^{(a_1)}) = X_i^{(a_1)}$ , where  $X_i^{(a_1)} \sim \text{Bernoulli}(r_{a_1,i}^-)$ , where  $r_{a_1,i}^-$  is negatively correlated with  $Y_{1,i}^{(a_1)}$ .
- $\mathbf{R}_+^{1\kappa}$ :  $g_{a_1}(Y_{1,i}^{(a_1)}) = \mathbb{1}\{Y_{1,i}^{(a_1)} \geq \kappa\}$ , where  $\kappa$  is the  $(1 - r_1)$ th quantile of the  $\mathcal{N}(\mu_1^{(a_1=1)}, \sigma^2)$  distribution.
- $\mathbf{R}_-^{1\kappa}$ :  $g_{a_1}(Y_{1,i}^{(a_1)}) = \mathbb{1}\{Y_{1,i}^{(a_1)} \leq \kappa\}$ , where  $\kappa$  is the  $r_1$ th quantile of the  $\mathcal{N}(\mu_1^{(a_1=1)}, \sigma^2)$  distribution.
- $\mathbf{R}_+^{2\kappa}$ :  $g_{a_1}(Y_{1,i}^{(a_1)}) = \mathbb{1}\{Y_{1,i}^{(a_1)} \geq \kappa_{a_1}\}$ , where  $\kappa_{a_1}$  is the  $(1 - r_{a_1})$ th quantile of the  $\mathcal{N}(\mu_1^{(a_1)}, \sigma^2)$  distribution.
- $\mathbf{R}_-^{2\kappa}$ :  $g_{a_1}(Y_{1,i}^{(a_1)}) = \mathbb{1}\{Y_{1,i}^{(a_1)} \leq \kappa_{a_1}\}$ , where  $\kappa_{a_1}$  is the  $r_{a_1}$ th quantile of the  $\mathcal{N}(\mu_1^{(a_1)}, \sigma^2)$  distribution.
- $\mathbf{R}_+^2$ :  $g_{a_1}(Y_{1,i}^{(a_1)}) = \mathbb{1}\left\{Y_1^{(d)} \in \left(-\infty, \kappa_{a_1}^{\text{low}}\right] \cup \left[\kappa_{a_1}^{\text{high}}, \infty\right)\right\}$ , where  $\kappa^{\text{low}}$  and  $\kappa^{\text{high}}$  are chosen to be the  $r/2$  and  $(1 - r/2)$ th quantiles of the  $\mathcal{N}(\mu_1^{(d)}, \sigma^2)$  distribution, respectively.
- $\mathbf{R}_-^2$ :  $g_{a_1}(Y_{1,i}^{(a_1)}) = \mathbb{1}\left\{Y_1^{(d)} \in \left(\kappa_{a_1}^{\text{low}}, \kappa_{a_1}^{\text{high}}\right)\right\}$ , where  $\kappa^{\text{low}}$  and  $\kappa^{\text{high}}$  are chosen to be the  $r/2$  and  $(1 - r/2)$ th quantiles of the  $\mathcal{N}(\mu_1^{(d)}, \sigma^2)$  distribution, respectively.

## Description of Table Formatting

Descriptions of the columns are as follows:

- $\delta$ : The true standardized effect size in the generated data (see equation (9))
- **Response**: Shorthand notation for the function  $g$  defining response (see appendix C)
- **Formula**: The sample size formula used; either “cons” (formula (10)) or “sharp” (formula (S8))
- $r_{-1}$ : The (average) probability of response to the first-stage treatment labeled  $-1$
- $r_1$ : The (average) probability of response to the first-stage treatment labeled  $1$
- $\rho$ : The true within-person correlation in the generated data
- $\rho_{\text{size}}$ : The estimated within-person correlation used in the sample size formula
- $n$ : The computed sample size using the appropriate sample size formula

- $1 - \hat{\beta}$ : Empirical power based on 3,000 simulations
- **p value**:  $p$ -value for the test of  $H_0 : 1 - \hat{\beta} = 0.80$  vs.  $H_1 : 1 - \hat{\beta} < 0.80$  (\* indicates the test is significant at the 5% level)
- **Coverage**: The proportion of simulations for which a 95%  $z$  confidence interval constructed around  $\hat{\gamma}$  contains the true parameter vector  $\gamma$
- **p value**:  $p$ -value for the test of  $H_0 : \text{Coverage} = 0.95$  vs.  $H_1 : \text{Coverage} \neq 0.95$  (\* indicates the test is significant at the 5% level)
- **Cor( $\mathbf{R}, \mathbf{Y}_0^2$ )**: An estimate of  $\text{Cor}(R^{(a_1^{(d)})}, (Y_0^{(d)} - \mu_0^{(d)})^2)$
- **Cor( $\mathbf{R}, \mathbf{Y}_1^2$ )**: An estimate of  $\text{Cor}(R^{(a_1^{(d)})}, (Y_1^{(d)} - \mu_1^{(d)})^2)$
- **Cor( $\mathbf{R}, \mathbf{Y}_0 \mathbf{Y}_1$ )**: An estimate of  $\text{Cor}(R^{(a_1^{(d)})}, (Y_0^{(d)} - \mu_0^{(d)})(Y_1^{(d)} - \mu_1^{(d)}))$
- **Cov( $\mathbf{Y}_0, \mathbf{Y}_2$ )**: The signed percent difference between  $c_0 = \text{Cov}(Y_0^{(d)}, Y_2^{(d)} \mid R^{(a_1^{(d)})} = 0)$  and  $c_1 = \text{Cov}(Y_0^{(d)}, Y_2^{(d)} \mid R^{(a_1^{(d)})} = 1)$ :

$$\text{“Cov}(Y_0, Y_2)\text{”} = \text{sign}(c_1 - c_0) \cdot \frac{|c_1 - c_0|}{|c_0|}.$$

If the value in the table is negative, working assumption A1(c) is satisfied. Note that when  $\rho = \rho_{\text{size}} = 0$ , these values are quite large; this is a result of the covariances being very small and does not reflect a large violation of the working assumption.

- **Cov( $\mathbf{Y}_1, \mathbf{Y}_2$ )**: Analogous to  $\text{Cov}(Y_0, Y_2)$ , with  $c_0 = \text{Cov}(Y_1^{(d)}, Y_2^{(d)} \mid R^{(a_1^{(d)})} = 0)$  and  $c_1 = \text{Cov}(Y_1^{(d)}, Y_2^{(d)} \mid R^{(a_1^{(d)})} = 1)$
- **% Valid**: The proportion of 3,000 simulation runs in which the generated SMART contained at least one individual consistent with each embedded DTR.

## S7.1 Additional Simulations for Design I

**Table S4:** Additional simulation results for design I when working assumptions A1 and A2 are satisfied

| $\delta$ | Response | Formula | $r_{-1}$ | $r_1$ | $\rho$ | $\rho_{\text{size}}$ | $n$ | $1 - \hat{\beta}$ | $p$ value | Coverage | $p$ value | $\text{Cor}(R, Y_0^2)$ | $\text{Cor}(R, Y_1^2)$ | $\text{Cor}(R, Y_0Y_1)$ | $\text{Cov}(Y_0, Y_2)$ | $\text{Cov}(Y_1, Y_2)$ | % Valid |
|----------|----------|---------|----------|-------|--------|----------------------|-----|-------------------|-----------|----------|-----------|------------------------|------------------------|-------------------------|------------------------|------------------------|---------|
| 0.3      | $R_+$    | cons.   | 0.4      | 0.4   | 0.0    | 0.0                  | 698 | 0.807             | 0.848     | 0.955    | 0.258     | 0.001                  | 0.077                  | -0.001                  | -2.906                 | 23.178                 | 100.0   |
| 0.3      | $R_+$    | cons.   | 0.4      | 0.4   | 0.3    | 0.3                  | 635 | 0.817             | 0.990     | 0.949    | 0.867     | 0.008                  | 0.078                  | 0.032                   | -0.014                 | -0.099                 | 100.0   |
| 0.3      | $R_+$    | cons.   | 0.4      | 0.4   | 0.6    | 0.6                  | 447 | 0.862             | 1.000     | 0.951    | 0.834     | 0.028                  | 0.078                  | 0.057                   | -0.049                 | -0.096                 | 100.0   |
| 0.3      | $R_+$    | cons.   | 0.4      | 0.4   | 0.8    | 0.8                  | 252 | 0.925             | 1.000     | 0.946    | 0.276     | 0.051                  | 0.078                  | 0.069                   | -0.073                 | -0.102                 | 100.0   |
| 0.3      | $R_+$    | cons.   | 0.4      | 0.6   | 0.0    | 0.0                  | 698 | 0.784             | 0.016*    | 0.945    | 0.209     | -0.001                 | 0.012                  | -0.001                  | -27.792                | -2.362                 | 100.0   |
| 0.3      | $R_+$    | cons.   | 0.4      | 0.6   | 0.3    | 0.3                  | 635 | 0.823             | 0.999     | 0.952    | 0.706     | 0.002                  | 0.009                  | 0.005                   | -0.001                 | -0.014                 | 100.0   |
| 0.3      | $R_+$    | cons.   | 0.4      | 0.6   | 0.6    | 0.6                  | 447 | 0.843             | 1.000     | 0.946    | 0.315     | 0.003                  | 0.010                  | 0.009                   | -0.004                 | -0.010                 | 100.0   |
| 0.3      | $R_+$    | cons.   | 0.4      | 0.6   | 0.8    | 0.8                  | 252 | 0.900             | 1.000     | 0.947    | 0.503     | 0.007                  | 0.010                  | 0.008                   | -0.005                 | -0.006                 | 100.0   |
| 0.3      | $R_+$    | cons.   | 0.6      | 0.4   | 0.0    | 0.0                  | 698 | 0.793             | 0.186     | 0.941    | 0.026*    | 0.001                  | 0.011                  | -0.001                  | 0.386                  | -4.877                 | 100.0   |
| 0.3      | $R_+$    | cons.   | 0.6      | 0.4   | 0.3    | 0.3                  | 635 | 0.824             | 1.000     | 0.954    | 0.379     | 0.001                  | 0.009                  | 0.004                   | 0.004                  | 0.006                  | 100.0   |
| 0.3      | $R_+$    | cons.   | 0.6      | 0.4   | 0.6    | 0.6                  | 447 | 0.875             | 1.000     | 0.935    | 0.000*    | 0.003                  | 0.009                  | 0.007                   | -0.004                 | -0.007                 | 100.0   |
| 0.3      | $R_+$    | cons.   | 0.6      | 0.4   | 0.8    | 0.8                  | 252 | 0.927             | 1.000     | 0.945    | 0.180     | 0.006                  | 0.009                  | 0.007                   | -0.007                 | -0.009                 | 100.0   |
| 0.3      | $R_+$    | cons.   | 0.6      | 0.6   | 0.0    | 0.0                  | 698 | 0.799             | 0.471     | 0.947    | 0.451     | -0.001                 | -0.061                 | -0.001                  | -5.979                 | -2.460                 | 100.0   |
| 0.3      | $R_+$    | cons.   | 0.6      | 0.6   | 0.3    | 0.3                  | 635 | 0.813             | 0.969     | 0.951    | 0.900     | -0.006                 | -0.061                 | -0.024                  | 0.021                  | 0.075                  | 100.0   |
| 0.3      | $R_+$    | cons.   | 0.6      | 0.6   | 0.6    | 0.6                  | 447 | 0.856             | 1.000     | 0.943    | 0.071     | -0.022                 | -0.061                 | -0.044                  | 0.041                  | 0.087                  | 100.0   |
| 0.3      | $R_+$    | cons.   | 0.6      | 0.6   | 0.8    | 0.8                  | 252 | 0.901             | 1.000     | 0.940    | 0.013*    | -0.040                 | -0.061                 | -0.054                  | 0.063                  | 0.084                  | 100.0   |
| 0.3      | $R_+$    | sharp   | 0.4      | 0.4   | 0.3    | 0.3                  | 618 | 0.814             | 0.975     | 0.944    | 0.111     | 0.007                  | 0.078                  | 0.032                   | -0.023                 | -0.098                 | 100.0   |
| 0.3      | $R_+$    | sharp   | 0.4      | 0.4   | 0.6    | 0.6                  | 416 | 0.840             | 1.000     | 0.942    | 0.059     | 0.030                  | 0.078                  | 0.058                   | -0.051                 | -0.096                 | 100.0   |
| 0.3      | $R_+$    | sharp   | 0.4      | 0.4   | 0.8    | 0.8                  | 227 | 0.899             | 1.000     | 0.942    | 0.040*    | 0.049                  | 0.077                  | 0.068                   | -0.079                 | -0.105                 | 100.0   |
| 0.3      | $R_+$    | sharp   | 0.4      | 0.6   | 0.3    | 0.3                  | 618 | 0.809             | 0.896     | 0.951    | 0.900     | 0.002                  | 0.010                  | 0.005                   | 0.006                  | -0.005                 | 100.0   |
| 0.3      | $R_+$    | sharp   | 0.4      | 0.6   | 0.6    | 0.6                  | 416 | 0.830             | 1.000     | 0.946    | 0.276     | 0.003                  | 0.008                  | 0.007                   | -0.007                 | -0.011                 | 100.0   |
| 0.3      | $R_+$    | sharp   | 0.4      | 0.6   | 0.8    | 0.8                  | 227 | 0.875             | 1.000     | 0.943    | 0.071     | 0.007                  | 0.011                  | 0.009                   | -0.014                 | -0.015                 | 100.0   |
| 0.3      | $R_+$    | sharp   | 0.6      | 0.4   | 0.3    | 0.3                  | 618 | 0.813             | 0.969     | 0.946    | 0.276     | 0.003                  | 0.011                  | 0.006                   | -0.000                 | -0.009                 | 100.0   |
| 0.3      | $R_+$    | sharp   | 0.6      | 0.4   | 0.6    | 0.6                  | 416 | 0.848             | 1.000     | 0.949    | 0.867     | 0.006                  | 0.009                  | 0.007                   | 0.003                  | -0.005                 | 100.0   |
| 0.3      | $R_+$    | sharp   | 0.6      | 0.4   | 0.8    | 0.8                  | 227 | 0.900             | 1.000     | 0.945    | 0.180     | 0.009                  | 0.013                  | 0.012                   | -0.011                 | -0.015                 | 100.0   |
| 0.3      | $R_+$    | sharp   | 0.6      | 0.6   | 0.3    | 0.3                  | 618 | 0.815             | 0.980     | 0.944    | 0.111     | -0.005                 | -0.059                 | -0.023                  | 0.017                  | 0.084                  | 100.0   |
| 0.3      | $R_+$    | sharp   | 0.6      | 0.6   | 0.6    | 0.6                  | 416 | 0.845             | 1.000     | 0.949    | 0.801     | -0.022                 | -0.061                 | -0.044                  | 0.040                  | 0.078                  | 100.0   |
| 0.3      | $R_+$    | sharp   | 0.6      | 0.6   | 0.8    | 0.8                  | 227 | 0.880             | 1.000     | 0.947    | 0.503     | -0.039                 | -0.062                 | -0.055                  | 0.053                  | 0.075                  | 100.0   |
| 0.3      | $R_-$    | cons.   | 0.4      | 0.4   | 0.0    | 0.0                  | 698 | 0.803             | 0.650     | 0.953    | 0.476     | 0.001                  | 0.079                  | 0.001                   | 2.023                  | -3.344                 | 100.0   |
| 0.3      | $R_-$    | cons.   | 0.4      | 0.4   | 0.3    | 0.3                  | 635 | 0.800             | 0.507     | 0.957    | 0.079     | 0.008                  | 0.079                  | 0.031                   | -0.020                 | -0.100                 | 100.0   |
| 0.3      | $R_-$    | cons.   | 0.4      | 0.4   | 0.6    | 0.6                  | 447 | 0.773             | 0.000*    | 0.950    | 0.933     | 0.027                  | 0.079                  | 0.057                   | -0.051                 | -0.102                 | 100.0   |
| 0.3      | $R_-$    | cons.   | 0.4      | 0.4   | 0.8    | 0.8                  | 252 | 0.733             | 0.000*    | 0.941    | 0.033*    | 0.051                  | 0.079                  | 0.069                   | -0.072                 | -0.101                 | 100.0   |
| 0.3      | $R_-$    | cons.   | 0.4      | 0.6   | 0.0    | 0.0                  | 698 | 0.792             | 0.132     | 0.949    | 0.867     | -0.001                 | 0.013                  | 0.001                   | -0.712                 | 4.656                  | 100.0   |
| 0.3      | $R_-$    | cons.   | 0.4      | 0.6   | 0.3    | 0.3                  | 635 | 0.789             | 0.064     | 0.954    | 0.379     | 0.002                  | 0.011                  | 0.003                   | -0.015                 | -0.008                 | 100.0   |
| 0.3      | $R_-$    | cons.   | 0.4      | 0.6   | 0.6    | 0.6                  | 447 | 0.805             | 0.760     | 0.949    | 0.737     | 0.004                  | 0.010                  | 0.007                   | 0.000                  | -0.006                 | 100.0   |
| 0.3      | $R_-$    | cons.   | 0.4      | 0.6   | 0.8    | 0.8                  | 252 | 0.767             | 0.000*    | 0.949    | 0.737     | 0.007                  | 0.010                  | 0.009                   | -0.005                 | -0.005                 | 100.0   |
| 0.3      | $R_-$    | cons.   | 0.6      | 0.4   | 0.0    | 0.0                  | 698 | 0.803             | 0.683     | 0.950    | 0.967     | 0.001                  | 0.014                  | 0.001                   | 1.690                  | -28.430                | 100.0   |
| 0.3      | $R_-$    | cons.   | 0.6      | 0.4   | 0.3    | 0.3                  | 635 | 0.791             | 0.114     | 0.948    | 0.557     | 0.000                  | 0.010                  | 0.002                   | -0.002                 | -0.018                 | 100.0   |
| 0.3      | $R_-$    | cons.   | 0.6      | 0.4   | 0.6    | 0.6                  | 447 | 0.784             | 0.018*    | 0.944    | 0.111     | 0.004                  | 0.010                  | 0.007                   | -0.009                 | -0.014                 | 100.0   |
| 0.3      | $R_-$    | cons.   | 0.6      | 0.4   | 0.8    | 0.8                  | 252 | 0.740             | 0.000*    | 0.947    | 0.402     | 0.007                  | 0.011                  | 0.009                   | -0.001                 | -0.003                 | 100.0   |
| 0.3      | $R_-$    | cons.   | 0.6      | 0.6   | 0.0    | 0.0                  | 698 | 0.806             | 0.787     | 0.949    | 0.867     | -0.001                 | -0.059                 | 0.001                   | 5.713                  | -1.166                 | 100.0   |
| 0.3      | $R_-$    | cons.   | 0.6      | 0.6   | 0.3    | 0.3                  | 635 | 0.792             | 0.152     | 0.947    | 0.402     | -0.006                 | -0.060                 | -0.025                  | 0.022                  | 0.083                  | 100.0   |
| 0.3      | $R_-$    | cons.   | 0.6      | 0.6   | 0.6    | 0.6                  | 447 | 0.798             | 0.382     | 0.950    | 1.000     | -0.021                 | -0.060                 | -0.044                  | 0.043                  | 0.084                  | 100.0   |
| 0.3      | $R_-$    | cons.   | 0.6      | 0.6   | 0.8    | 0.8                  | 252 | 0.758             | 0.000*    | 0.946    | 0.315     | -0.039                 | -0.059                 | -0.052                  | 0.064                  | 0.088                  | 100.0   |

Continued on next page

Additional simulation results for design I when working assumptions A1 and A2 are satisfied

| $\delta$ | Response         | Formula | $r_{-1}$ | $r_1$ | $\rho$ | $\rho_{\text{size}}$ | $n$ | $1 - \hat{\beta}$ | $p$ value | Coverage | $p$ value | $\text{Cor}(R, Y_0^2)$ | $\text{Cor}(R, Y_1^2)$ | $\text{Cor}(R, Y_0Y_1)$ | $\text{Cov}(Y_0, Y_2)$ | $\text{Cov}(Y_1, Y_2)$ | % Valid |
|----------|------------------|---------|----------|-------|--------|----------------------|-----|-------------------|-----------|----------|-----------|------------------------|------------------------|-------------------------|------------------------|------------------------|---------|
| 0.3      | $R_{-}$          | sharp   | 0.4      | 0.4   | 0.3    | 0.3                  | 618 | 0.774             | 0.000*    | 0.945    | 0.241     | 0.007                  | 0.078                  | 0.031                   | -0.026                 | -0.106                 | 100.0   |
| 0.3      | $R_{-}$          | sharp   | 0.4      | 0.4   | 0.6    | 0.6                  | 416 | 0.756             | 0.000*    | 0.938    | 0.004*    | 0.028                  | 0.079                  | 0.057                   | -0.051                 | -0.102                 | 100.0   |
| 0.3      | $R_{-}$          | sharp   | 0.4      | 0.4   | 0.8    | 0.8                  | 227 | 0.698             | 0.000*    | 0.945    | 0.209     | 0.050                  | 0.080                  | 0.070                   | -0.073                 | -0.099                 | 100.0   |
| 0.3      | $R_{-}$          | sharp   | 0.4      | 0.6   | 0.3    | 0.3                  | 618 | 0.781             | 0.006*    | 0.939    | 0.007*    | 0.001                  | 0.010                  | 0.004                   | -0.016                 | -0.012                 | 100.0   |
| 0.3      | $R_{-}$          | sharp   | 0.4      | 0.6   | 0.6    | 0.6                  | 416 | 0.776             | 0.001*    | 0.951    | 0.900     | 0.005                  | 0.010                  | 0.007                   | -0.001                 | -0.005                 | 100.0   |
| 0.3      | $R_{-}$          | sharp   | 0.4      | 0.6   | 0.8    | 0.8                  | 227 | 0.727             | 0.000*    | 0.944    | 0.132     | 0.009                  | 0.015                  | 0.014                   | -0.003                 | -0.005                 | 100.0   |
| 0.3      | $R_{-}$          | sharp   | 0.6      | 0.4   | 0.3    | 0.3                  | 618 | 0.768             | 0.000*    | 0.949    | 0.737     | 0.002                  | 0.009                  | 0.003                   | -0.003                 | -0.010                 | 100.0   |
| 0.3      | $R_{-}$          | sharp   | 0.6      | 0.4   | 0.6    | 0.6                  | 416 | 0.738             | 0.000*    | 0.952    | 0.706     | 0.004                  | 0.010                  | 0.008                   | -0.004                 | -0.009                 | 100.0   |
| 0.3      | $R_{-}$          | sharp   | 0.6      | 0.4   | 0.8    | 0.8                  | 227 | 0.701             | 0.000*    | 0.946    | 0.276     | 0.009                  | 0.014                  | 0.013                   | -0.005                 | -0.007                 | 100.0   |
| 0.3      | $R_{-}$          | sharp   | 0.6      | 0.6   | 0.3    | 0.3                  | 618 | 0.782             | 0.007*    | 0.947    | 0.402     | -0.006                 | -0.061                 | -0.026                  | 0.014                  | 0.079                  | 100.0   |
| 0.3      | $R_{-}$          | sharp   | 0.6      | 0.6   | 0.6    | 0.6                  | 416 | 0.773             | 0.000*    | 0.949    | 0.867     | -0.023                 | -0.059                 | -0.045                  | 0.041                  | 0.083                  | 100.0   |
| 0.3      | $R_{-}$          | sharp   | 0.6      | 0.6   | 0.8    | 0.8                  | 227 | 0.737             | 0.000*    | 0.943    | 0.086     | -0.038                 | -0.059                 | -0.052                  | 0.063                  | 0.085                  | 100.0   |
| 0.3      | $R_{\perp\perp}$ | cons.   | 0.4      | 0.4   | 0.0    | 0.0                  | 698 | 0.798             | 0.399     | 0.945    | 0.241     | -0.000                 | -0.001                 | 0.001                   | 0.329                  | -0.532                 | 100.0   |
| 0.3      | $R_{\perp\perp}$ | cons.   | 0.4      | 0.4   | 0.0    | 0.0                  | 698 | 0.791             | 0.123     | 0.950    | 1.000     | 0.001                  | -0.001                 | -0.000                  | -2.441                 | 0.236                  | 100.0   |
| 0.3      | $R_{\perp\perp}$ | cons.   | 0.4      | 0.4   | 0.3    | 0.3                  | 635 | 0.819             | 0.995     | 0.949    | 0.737     | 0.002                  | 0.000                  | -0.000                  | -0.001                 | 0.006                  | 100.0   |
| 0.3      | $R_{\perp\perp}$ | cons.   | 0.4      | 0.4   | 0.3    | 0.3                  | 635 | 0.818             | 0.993     | 0.952    | 0.706     | 0.001                  | -0.000                 | 0.001                   | 0.003                  | 0.009                  | 100.0   |
| 0.3      | $R_{\perp\perp}$ | cons.   | 0.4      | 0.4   | 0.6    | 0.6                  | 447 | 0.815             | 0.980     | 0.944    | 0.111     | 0.001                  | -0.001                 | 0.000                   | -0.002                 | -0.005                 | 100.0   |
| 0.3      | $R_{\perp\perp}$ | cons.   | 0.4      | 0.4   | 0.6    | 0.6                  | 447 | 0.836             | 1.000     | 0.951    | 0.834     | -0.001                 | -0.002                 | -0.001                  | 0.005                  | 0.011                  | 100.0   |
| 0.3      | $R_{\perp\perp}$ | cons.   | 0.4      | 0.4   | 0.8    | 0.8                  | 252 | 0.835             | 1.000     | 0.955    | 0.194     | 0.002                  | 0.002                  | 0.002                   | 0.003                  | 0.003                  | 100.0   |
| 0.3      | $R_{\perp\perp}$ | cons.   | 0.4      | 0.4   | 0.8    | 0.8                  | 252 | 0.847             | 1.000     | 0.943    | 0.086     | -0.003                 | -0.002                 | -0.003                  | 0.005                  | 0.007                  | 100.0   |
| 0.3      | $R_{\perp\perp}$ | cons.   | 0.4      | 0.6   | 0.0    | 0.0                  | 698 | 0.804             | 0.699     | 0.952    | 0.706     | -0.001                 | -0.000                 | 0.002                   | 1.966                  | -1.472                 | 100.0   |
| 0.3      | $R_{\perp\perp}$ | cons.   | 0.4      | 0.6   | 0.0    | 0.0                  | 698 | 0.807             | 0.825     | 0.947    | 0.402     | 0.001                  | -0.001                 | -0.002                  | -1.509                 | 0.509                  | 100.0   |
| 0.3      | $R_{\perp\perp}$ | cons.   | 0.4      | 0.6   | 0.3    | 0.3                  | 635 | 0.802             | 0.632     | 0.948    | 0.615     | 0.000                  | 0.001                  | -0.001                  | -0.001                 | 0.012                  | 100.0   |
| 0.3      | $R_{\perp\perp}$ | cons.   | 0.4      | 0.6   | 0.3    | 0.3                  | 635 | 0.815             | 0.982     | 0.946    | 0.315     | -0.001                 | -0.001                 | -0.003                  | 0.007                  | 0.014                  | 100.0   |
| 0.3      | $R_{\perp\perp}$ | cons.   | 0.4      | 0.6   | 0.6    | 0.6                  | 447 | 0.819             | 0.996     | 0.950    | 0.967     | 0.002                  | -0.002                 | 0.002                   | 0.001                  | 0.001                  | 100.0   |
| 0.3      | $R_{\perp\perp}$ | cons.   | 0.4      | 0.6   | 0.6    | 0.6                  | 447 | 0.837             | 1.000     | 0.947    | 0.503     | -0.001                 | -0.001                 | -0.002                  | 0.020                  | 0.018                  | 100.0   |
| 0.3      | $R_{\perp\perp}$ | cons.   | 0.4      | 0.6   | 0.8    | 0.8                  | 252 | 0.836             | 1.000     | 0.949    | 0.801     | 0.003                  | 0.001                  | 0.002                   | 0.007                  | 0.005                  | 100.0   |
| 0.3      | $R_{\perp\perp}$ | cons.   | 0.4      | 0.6   | 0.8    | 0.8                  | 252 | 0.844             | 1.000     | 0.948    | 0.675     | 0.003                  | 0.002                  | 0.003                   | -0.090                 | -0.091                 | 100.0   |
| 0.3      | $R_{\perp\perp}$ | cons.   | 0.6      | 0.4   | 0.0    | 0.0                  | 698 | 0.795             | 0.253     | 0.953    | 0.426     | 0.001                  | 0.000                  | -0.002                  | 2.232                  | -0.917                 | 100.0   |
| 0.3      | $R_{\perp\perp}$ | cons.   | 0.6      | 0.4   | 0.0    | 0.0                  | 698 | 0.797             | 0.331     | 0.948    | 0.615     | 0.002                  | -0.001                 | -0.000                  | 1.407                  | 0.552                  | 100.0   |
| 0.3      | $R_{\perp\perp}$ | cons.   | 0.6      | 0.4   | 0.3    | 0.3                  | 635 | 0.806             | 0.787     | 0.952    | 0.645     | -0.000                 | -0.001                 | 0.001                   | 0.001                  | 0.007                  | 100.0   |
| 0.3      | $R_{\perp\perp}$ | cons.   | 0.6      | 0.4   | 0.3    | 0.3                  | 635 | 0.818             | 0.993     | 0.957    | 0.079     | 0.001                  | -0.002                 | -0.001                  | 0.018                  | 0.011                  | 100.0   |
| 0.3      | $R_{\perp\perp}$ | cons.   | 0.6      | 0.4   | 0.6    | 0.6                  | 447 | 0.823             | 0.999     | 0.949    | 0.801     | -0.002                 | 0.002                  | -0.002                  | -0.003                 | 0.001                  | 100.0   |
| 0.3      | $R_{\perp\perp}$ | cons.   | 0.6      | 0.4   | 0.6    | 0.6                  | 447 | 0.833             | 1.000     | 0.949    | 0.801     | 0.001                  | -0.001                 | -0.001                  | 0.012                  | 0.011                  | 100.0   |
| 0.3      | $R_{\perp\perp}$ | cons.   | 0.6      | 0.4   | 0.8    | 0.8                  | 252 | 0.837             | 1.000     | 0.939    | 0.007*    | -0.003                 | -0.001                 | -0.002                  | -0.005                 | -0.002                 | 100.0   |
| 0.3      | $R_{\perp\perp}$ | cons.   | 0.6      | 0.4   | 0.8    | 0.8                  | 252 | 0.850             | 1.000     | 0.949    | 0.867     | 0.002                  | 0.002                  | 0.001                   | -0.095                 | -0.095                 | 100.0   |
| 0.3      | $R_{\perp\perp}$ | cons.   | 0.6      | 0.6   | 0.0    | 0.0                  | 698 | 0.796             | 0.283     | 0.942    | 0.059     | 0.000                  | 0.001                  | -0.001                  | 1.919                  | -1.397                 | 100.0   |
| 0.3      | $R_{\perp\perp}$ | cons.   | 0.6      | 0.6   | 0.0    | 0.0                  | 698 | 0.811             | 0.932     | 0.952    | 0.706     | -0.001                 | 0.001                  | -0.002                  | -3.154                 | 2.568                  | 100.0   |
| 0.3      | $R_{\perp\perp}$ | cons.   | 0.6      | 0.6   | 0.3    | 0.3                  | 635 | 0.808             | 0.869     | 0.952    | 0.706     | -0.002                 | -0.000                 | 0.000                   | -0.008                 | -0.000                 | 100.0   |
| 0.3      | $R_{\perp\perp}$ | cons.   | 0.6      | 0.6   | 0.3    | 0.3                  | 635 | 0.809             | 0.896     | 0.951    | 0.834     | -0.001                 | 0.001                  | 0.001                   | 0.012                  | 0.017                  | 100.0   |
| 0.3      | $R_{\perp\perp}$ | cons.   | 0.6      | 0.6   | 0.6    | 0.6                  | 447 | 0.833             | 1.000     | 0.943    | 0.094     | -0.001                 | 0.001                  | -0.000                  | 0.001                  | 0.007                  | 100.0   |
| 0.3      | $R_{\perp\perp}$ | cons.   | 0.6      | 0.6   | 0.6    | 0.6                  | 447 | 0.827             | 1.000     | 0.953    | 0.476     | -0.001                 | 0.001                  | -0.001                  | 0.018                  | 0.018                  | 100.0   |
| 0.3      | $R_{\perp\perp}$ | cons.   | 0.6      | 0.6   | 0.8    | 0.8                  | 252 | 0.827             | 1.000     | 0.939    | 0.006*    | -0.002                 | -0.002                 | -0.002                  | -0.002                 | -0.001                 | 100.0   |
| 0.3      | $R_{\perp\perp}$ | cons.   | 0.6      | 0.6   | 0.8    | 0.8                  | 252 | 0.850             | 1.000     | 0.952    | 0.586     | -0.004                 | -0.000                 | -0.002                  | -0.191                 | -0.189                 | 100.0   |
| 0.3      | $R_{\perp\perp}$ | sharp   | 0.4      | 0.4   | 0.3    | 0.3                  | 618 | 0.799             | 0.453     | 0.949    | 0.867     | 0.002                  | -0.002                 | 0.002                   | 0.002                  | 0.009                  | 100.0   |
| 0.3      | $R_{\perp\perp}$ | sharp   | 0.4      | 0.4   | 0.3    | 0.3                  | 618 | 0.800             | 0.489     | 0.949    | 0.801     | -0.001                 | 0.001                  | 0.001                   | -0.004                 | 0.004                  | 100.0   |
| 0.3      | $R_{\perp\perp}$ | sharp   | 0.4      | 0.4   | 0.6    | 0.6                  | 416 | 0.791             | 0.114     | 0.945    | 0.180     | -0.002                 | 0.001                  | -0.001                  | 0.008                  | 0.012                  | 100.0   |

Continued on next page

Additional simulation results for design I when working assumptions A1 and A2 are satisfied

| $\delta$ | Response         | Formula | $r_{-1}$ | $r_1$ | $\rho$ | $\rho_{\text{size}}$ | $n$ | $1 - \hat{\beta}$ | $p$ value | Coverage | $p$ value | $\text{Cor}(R, Y_0^2)$ | $\text{Cor}(R, Y_1^2)$ | $\text{Cor}(R, Y_0Y_1)$ | $\text{Cov}(Y_0, Y_2)$ | $\text{Cov}(Y_1, Y_2)$ | % Valid |
|----------|------------------|---------|----------|-------|--------|----------------------|-----|-------------------|-----------|----------|-----------|------------------------|------------------------|-------------------------|------------------------|------------------------|---------|
| 0.3      | $R_{\perp\perp}$ | sharp   | 0.4      | 0.4   | 0.6    | 0.6                  | 416 | 0.805             | 0.745     | 0.954    | 0.295     | 0.002                  | -0.002                 | 0.002                   | 0.004                  | 0.001                  | 100.0   |
| 0.3      | $R_{\perp\perp}$ | sharp   | 0.4      | 0.4   | 0.8    | 0.8                  | 227 | 0.796             | 0.283     | 0.941    | 0.021*    | 0.003                  | 0.003                  | 0.003                   | 0.013                  | 0.011                  | 100.0   |
| 0.3      | $R_{\perp\perp}$ | sharp   | 0.4      | 0.4   | 0.8    | 0.8                  | 227 | 0.790             | 0.097     | 0.944    | 0.132     | -0.001                 | 0.003                  | -0.001                  | 0.000                  | 0.002                  | 100.0   |
| 0.3      | $R_{\perp\perp}$ | sharp   | 0.4      | 0.6   | 0.3    | 0.3                  | 618 | 0.809             | 0.904     | 0.952    | 0.645     | 0.001                  | -0.000                 | 0.002                   | 0.015                  | 0.031                  | 100.0   |
| 0.3      | $R_{\perp\perp}$ | sharp   | 0.4      | 0.6   | 0.3    | 0.3                  | 618 | 0.787             | 0.040*    | 0.948    | 0.675     | -0.001                 | -0.002                 | -0.002                  | -0.014                 | -0.007                 | 100.0   |
| 0.3      | $R_{\perp\perp}$ | sharp   | 0.4      | 0.6   | 0.6    | 0.6                  | 416 | 0.806             | 0.800     | 0.943    | 0.086     | -0.002                 | -0.002                 | -0.002                  | 0.014                  | 0.016                  | 100.0   |
| 0.3      | $R_{\perp\perp}$ | sharp   | 0.4      | 0.6   | 0.6    | 0.6                  | 416 | 0.799             | 0.435     | 0.949    | 0.801     | -0.003                 | -0.002                 | -0.002                  | -0.011                 | -0.006                 | 100.0   |
| 0.3      | $R_{\perp\perp}$ | sharp   | 0.4      | 0.6   | 0.8    | 0.8                  | 227 | 0.807             | 0.825     | 0.944    | 0.132     | 0.002                  | -0.001                 | 0.001                   | -0.093                 | -0.097                 | 100.0   |
| 0.3      | $R_{\perp\perp}$ | sharp   | 0.4      | 0.6   | 0.8    | 0.8                  | 227 | 0.793             | 0.163     | 0.940    | 0.012*    | -0.001                 | -0.002                 | -0.001                  | -0.000                 | -0.000                 | 100.0   |
| 0.3      | $R_{\perp\perp}$ | sharp   | 0.6      | 0.4   | 0.3    | 0.3                  | 618 | 0.807             | 0.837     | 0.949    | 0.801     | -0.001                 | -0.002                 | -0.003                  | 0.012                  | 0.000                  | 100.0   |
| 0.3      | $R_{\perp\perp}$ | sharp   | 0.6      | 0.4   | 0.3    | 0.3                  | 618 | 0.796             | 0.315     | 0.942    | 0.059     | 0.001                  | 0.002                  | 0.002                   | 0.004                  | 0.005                  | 100.0   |
| 0.3      | $R_{\perp\perp}$ | sharp   | 0.6      | 0.4   | 0.6    | 0.6                  | 416 | 0.817             | 0.991     | 0.946    | 0.276     | -0.001                 | -0.001                 | -0.001                  | 0.010                  | 0.012                  | 100.0   |
| 0.3      | $R_{\perp\perp}$ | sharp   | 0.6      | 0.4   | 0.6    | 0.6                  | 416 | 0.797             | 0.348     | 0.948    | 0.675     | 0.003                  | 0.002                  | 0.002                   | 0.007                  | 0.001                  | 100.0   |
| 0.3      | $R_{\perp\perp}$ | sharp   | 0.6      | 0.4   | 0.8    | 0.8                  | 227 | 0.810             | 0.919     | 0.944    | 0.132     | -0.002                 | -0.001                 | -0.001                  | -0.102                 | -0.100                 | 100.0   |
| 0.3      | $R_{\perp\perp}$ | sharp   | 0.6      | 0.4   | 0.8    | 0.8                  | 227 | 0.786             | 0.033*    | 0.937    | 0.001*    | 0.001                  | 0.002                  | 0.001                   | 0.002                  | 0.001                  | 100.0   |
| 0.3      | $R_{\perp\perp}$ | sharp   | 0.6      | 0.6   | 0.3    | 0.3                  | 618 | 0.800             | 0.507     | 0.953    | 0.530     | 0.002                  | 0.001                  | 0.002                   | 0.026                  | 0.022                  | 100.0   |
| 0.3      | $R_{\perp\perp}$ | sharp   | 0.6      | 0.6   | 0.3    | 0.3                  | 618 | 0.797             | 0.331     | 0.948    | 0.675     | 0.001                  | -0.001                 | -0.001                  | -0.001                 | -0.003                 | 100.0   |
| 0.3      | $R_{\perp\perp}$ | sharp   | 0.6      | 0.6   | 0.6    | 0.6                  | 416 | 0.811             | 0.943     | 0.947    | 0.402     | -0.001                 | -0.001                 | -0.001                  | 0.013                  | 0.011                  | 100.0   |
| 0.3      | $R_{\perp\perp}$ | sharp   | 0.6      | 0.6   | 0.6    | 0.6                  | 416 | 0.810             | 0.919     | 0.946    | 0.276     | -0.002                 | 0.002                  | -0.002                  | -0.001                 | -0.002                 | 100.0   |
| 0.3      | $R_{\perp\perp}$ | sharp   | 0.6      | 0.6   | 0.8    | 0.8                  | 227 | 0.811             | 0.938     | 0.946    | 0.357     | 0.002                  | 0.002                  | 0.002                   | -0.187                 | -0.187                 | 100.0   |
| 0.3      | $R_{\perp\perp}$ | sharp   | 0.6      | 0.6   | 0.8    | 0.8                  | 227 | 0.793             | 0.175     | 0.945    | 0.180     | 0.001                  | -0.003                 | 0.001                   | -0.000                 | -0.002                 | 100.0   |
| 0.5      | $R_+$            | cons.   | 0.4      | 0.4   | 0.0    | 0.0                  | 252 | 0.801             | 0.562     | 0.942    | 0.059     | -0.001                 | 0.079                  | -0.003                  | 15.305                 | 0.679                  | 100.0   |
| 0.5      | $R_+$            | cons.   | 0.4      | 0.4   | 0.3    | 0.3                  | 229 | 0.815             | 0.982     | 0.940    | 0.012*    | 0.007                  | 0.079                  | 0.032                   | -0.019                 | -0.101                 | 100.0   |
| 0.5      | $R_+$            | cons.   | 0.4      | 0.4   | 0.6    | 0.6                  | 161 | 0.872             | 1.000     | 0.938    | 0.004*    | 0.031                  | 0.081                  | 0.061                   | -0.051                 | -0.100                 | 100.0   |
| 0.5      | $R_+$            | cons.   | 0.4      | 0.4   | 0.8    | 0.8                  | 91  | 0.931             | 1.000     | 0.936    | 0.001*    | 0.054                  | 0.081                  | 0.072                   | -0.087                 | -0.108                 | 100.0   |
| 0.5      | $R_+$            | cons.   | 0.4      | 0.6   | 0.0    | 0.0                  | 252 | 0.799             | 0.471     | 0.941    | 0.021*    | -0.002                 | 0.011                  | -0.002                  | 12.072                 | 1.704                  | 100.0   |
| 0.5      | $R_+$            | cons.   | 0.4      | 0.6   | 0.3    | 0.3                  | 229 | 0.823             | 0.999     | 0.946    | 0.315     | -0.002                 | 0.011                  | 0.003                   | -0.013                 | -0.022                 | 100.0   |
| 0.5      | $R_+$            | cons.   | 0.4      | 0.6   | 0.6    | 0.6                  | 161 | 0.852             | 1.000     | 0.946    | 0.357     | 0.008                  | 0.012                  | 0.012                   | -0.006                 | -0.005                 | 100.0   |
| 0.5      | $R_+$            | cons.   | 0.4      | 0.6   | 0.8    | 0.8                  | 91  | 0.899             | 1.000     | 0.936    | 0.000*    | 0.010                  | 0.011                  | 0.012                   | -0.014                 | -0.013                 | 100.0   |
| 0.5      | $R_+$            | cons.   | 0.6      | 0.4   | 0.0    | 0.0                  | 252 | 0.795             | 0.268     | 0.947    | 0.402     | -0.003                 | 0.010                  | -0.002                  | 2.184                  | 1.344                  | 100.0   |
| 0.5      | $R_+$            | cons.   | 0.6      | 0.4   | 0.3    | 0.3                  | 229 | 0.828             | 1.000     | 0.945    | 0.180     | 0.002                  | 0.009                  | 0.003                   | 0.014                  | -0.011                 | 100.0   |
| 0.5      | $R_+$            | cons.   | 0.6      | 0.4   | 0.6    | 0.6                  | 161 | 0.879             | 1.000     | 0.941    | 0.033*    | 0.005                  | 0.010                  | 0.009                   | 0.002                  | 0.003                  | 100.0   |
| 0.5      | $R_+$            | cons.   | 0.6      | 0.4   | 0.8    | 0.8                  | 91  | 0.923             | 1.000     | 0.936    | 0.001*    | 0.009                  | 0.015                  | 0.014                   | -0.020                 | -0.017                 | 100.0   |
| 0.5      | $R_+$            | cons.   | 0.6      | 0.6   | 0.0    | 0.0                  | 252 | 0.797             | 0.348     | 0.937    | 0.002*    | -0.004                 | -0.060                 | -0.002                  | -0.466                 | -1.418                 | 100.0   |
| 0.5      | $R_+$            | cons.   | 0.6      | 0.6   | 0.3    | 0.3                  | 229 | 0.815             | 0.984     | 0.952    | 0.645     | -0.009                 | -0.061                 | -0.026                  | 0.002                  | 0.051                  | 100.0   |
| 0.5      | $R_+$            | cons.   | 0.6      | 0.6   | 0.6    | 0.6                  | 161 | 0.859             | 1.000     | 0.946    | 0.315     | -0.021                 | -0.060                 | -0.041                  | 0.045                  | 0.087                  | 100.0   |
| 0.5      | $R_+$            | cons.   | 0.6      | 0.6   | 0.8    | 0.8                  | 91  | 0.896             | 1.000     | 0.940    | 0.013*    | -0.038                 | -0.060                 | -0.052                  | 0.056                  | 0.078                  | 100.0   |
| 0.5      | $R_+$            | sharp   | 0.4      | 0.4   | 0.3    | 0.3                  | 223 | 0.816             | 0.989     | 0.956    | 0.167     | 0.007                  | 0.077                  | 0.032                   | -0.030                 | -0.106                 | 100.0   |
| 0.5      | $R_+$            | sharp   | 0.4      | 0.4   | 0.6    | 0.6                  | 150 | 0.842             | 1.000     | 0.944    | 0.154     | 0.030                  | 0.082                  | 0.060                   | -0.054                 | -0.102                 | 100.0   |
| 0.5      | $R_+$            | sharp   | 0.4      | 0.4   | 0.8    | 0.8                  | 82  | 0.901             | 1.000     | 0.943    | 0.065     | 0.052                  | 0.082                  | 0.073                   | -0.091                 | -0.114                 | 99.9    |
| 0.5      | $R_+$            | sharp   | 0.4      | 0.6   | 0.3    | 0.3                  | 223 | 0.810             | 0.912     | 0.941    | 0.033*    | 0.002                  | 0.009                  | 0.004                   | 0.012                  | -0.011                 | 100.0   |
| 0.5      | $R_+$            | sharp   | 0.4      | 0.6   | 0.6    | 0.6                  | 150 | 0.834             | 1.000     | 0.948    | 0.557     | 0.006                  | 0.015                  | 0.012                   | -0.004                 | -0.006                 | 100.0   |
| 0.5      | $R_+$            | sharp   | 0.4      | 0.6   | 0.8    | 0.8                  | 82  | 0.870             | 1.000     | 0.937    | 0.001*    | 0.008                  | 0.013                  | 0.010                   | -0.017                 | -0.010                 | 99.9    |
| 0.5      | $R_+$            | sharp   | 0.6      | 0.4   | 0.3    | 0.3                  | 223 | 0.815             | 0.984     | 0.941    | 0.033*    | 0.004                  | 0.008                  | 0.004                   | -0.001                 | -0.025                 | 100.0   |
| 0.5      | $R_+$            | sharp   | 0.6      | 0.4   | 0.6    | 0.6                  | 150 | 0.839             | 1.000     | 0.935    | 0.000*    | 0.003                  | 0.009                  | 0.007                   | -0.004                 | -0.009                 | 100.0   |
| 0.5      | $R_+$            | sharp   | 0.6      | 0.4   | 0.8    | 0.8                  | 82  | 0.892             | 1.000     | 0.936    | 0.000*    | 0.007                  | 0.013                  | 0.010                   | -0.015                 | -0.014                 | 100.0   |
| 0.5      | $R_+$            | sharp   | 0.6      | 0.6   | 0.3    | 0.3                  | 223 | 0.804             | 0.699     | 0.945    | 0.241     | -0.004                 | -0.061                 | -0.024                  | 0.032                  | 0.084                  | 100.0   |

Continued on next page

Additional simulation results for design I when working assumptions A1 and A2 are satisfied

| $\delta$ | Response         | Formula | $r_{-1}$ | $r_1$ | $\rho$ | $\rho_{\text{size}}$ | $n$ | $1 - \hat{\beta}$ | $p$ value | Coverage | $p$ value | $\text{Cor}(R, Y_0^2)$ | $\text{Cor}(R, Y_1^2)$ | $\text{Cor}(R, Y_0Y_1)$ | $\text{Cov}(Y_0, Y_2)$ | $\text{Cov}(Y_1, Y_2)$ | % Valid |
|----------|------------------|---------|----------|-------|--------|----------------------|-----|-------------------|-----------|----------|-----------|------------------------|------------------------|-------------------------|------------------------|------------------------|---------|
| 0.5      | $R_+$            | sharp   | 0.6      | 0.6   | 0.6    | 0.6                  | 150 | 0.833             | 1.000     | 0.944    | 0.154     | -0.023                 | -0.064                 | -0.045                  | 0.040                  | 0.079                  | 100.0   |
| 0.5      | $R_+$            | sharp   | 0.6      | 0.6   | 0.8    | 0.8                  | 82  | 0.870             | 1.000     | 0.938    | 0.004*    | -0.037                 | -0.062                 | -0.053                  | 0.064                  | 0.087                  | 100.0   |
| 0.5      | $R_-$            | cons.   | 0.4      | 0.4   | 0.0    | 0.0                  | 252 | 0.798             | 0.417     | 0.955    | 0.224     | 0.004                  | 0.079                  | 0.001                   | 5.406                  | -0.139                 | 100.0   |
| 0.5      | $R_-$            | cons.   | 0.4      | 0.4   | 0.3    | 0.3                  | 229 | 0.797             | 0.331     | 0.944    | 0.154     | 0.009                  | 0.079                  | 0.033                   | -0.021                 | -0.099                 | 100.0   |
| 0.5      | $R_-$            | cons.   | 0.4      | 0.4   | 0.6    | 0.6                  | 161 | 0.789             | 0.070     | 0.937    | 0.002*    | 0.026                  | 0.078                  | 0.054                   | -0.058                 | -0.114                 | 100.0   |
| 0.5      | $R_-$            | cons.   | 0.4      | 0.4   | 0.8    | 0.8                  | 91  | 0.734             | 0.000*    | 0.934    | 0.000*    | 0.051                  | 0.080                  | 0.070                   | -0.065                 | -0.098                 | 100.0   |
| 0.5      | $R_-$            | cons.   | 0.4      | 0.6   | 0.0    | 0.0                  | 252 | 0.799             | 0.453     | 0.946    | 0.315     | 0.004                  | 0.009                  | 0.001                   | 2.658                  | 2.910                  | 100.0   |
| 0.5      | $R_-$            | cons.   | 0.4      | 0.6   | 0.3    | 0.3                  | 229 | 0.797             | 0.365     | 0.939    | 0.006*    | 0.001                  | 0.010                  | 0.006                   | -0.010                 | -0.001                 | 100.0   |
| 0.5      | $R_-$            | cons.   | 0.4      | 0.6   | 0.6    | 0.6                  | 161 | 0.797             | 0.331     | 0.944    | 0.111     | 0.002                  | 0.011                  | 0.007                   | -0.014                 | -0.017                 | 100.0   |
| 0.5      | $R_-$            | cons.   | 0.4      | 0.6   | 0.8    | 0.8                  | 91  | 0.769             | 0.000*    | 0.939    | 0.007*    | 0.005                  | 0.011                  | 0.007                   | 0.002                  | -0.002                 | 99.9    |
| 0.5      | $R_-$            | cons.   | 0.6      | 0.4   | 0.0    | 0.0                  | 252 | 0.800             | 0.507     | 0.939    | 0.006*    | 0.002                  | 0.010                  | 0.001                   | -0.376                 | 1.378                  | 100.0   |
| 0.5      | $R_-$            | cons.   | 0.6      | 0.4   | 0.3    | 0.3                  | 229 | 0.795             | 0.253     | 0.933    | 0.000*    | 0.001                  | 0.011                  | 0.006                   | -0.006                 | -0.014                 | 100.0   |
| 0.5      | $R_-$            | cons.   | 0.6      | 0.4   | 0.6    | 0.6                  | 161 | 0.792             | 0.142     | 0.947    | 0.451     | 0.003                  | 0.012                  | 0.007                   | -0.012                 | -0.014                 | 100.0   |
| 0.5      | $R_-$            | cons.   | 0.6      | 0.4   | 0.8    | 0.8                  | 91  | 0.760             | 0.000*    | 0.939    | 0.009*    | 0.011                  | 0.012                  | 0.012                   | 0.010                  | 0.000                  | 100.0   |
| 0.5      | $R_-$            | cons.   | 0.6      | 0.6   | 0.0    | 0.0                  | 252 | 0.810             | 0.919     | 0.947    | 0.402     | 0.001                  | -0.062                 | 0.002                   | 1.618                  | -1.119                 | 100.0   |
| 0.5      | $R_-$            | cons.   | 0.6      | 0.6   | 0.3    | 0.3                  | 229 | 0.808             | 0.878     | 0.944    | 0.154     | -0.006                 | -0.060                 | -0.025                  | 0.019                  | 0.078                  | 100.0   |
| 0.5      | $R_-$            | cons.   | 0.6      | 0.6   | 0.6    | 0.6                  | 161 | 0.790             | 0.083     | 0.943    | 0.071     | -0.025                 | -0.063                 | -0.049                  | 0.040                  | 0.076                  | 100.0   |
| 0.5      | $R_-$            | cons.   | 0.6      | 0.6   | 0.8    | 0.8                  | 91  | 0.765             | 0.000*    | 0.937    | 0.001*    | -0.042                 | -0.060                 | -0.055                  | 0.085                  | 0.100                  | 99.9    |
| 0.5      | $R_-$            | sharp   | 0.4      | 0.4   | 0.3    | 0.3                  | 223 | 0.775             | 0.000*    | 0.944    | 0.154     | 0.007                  | 0.080                  | 0.032                   | -0.027                 | -0.102                 | 100.0   |
| 0.5      | $R_-$            | sharp   | 0.4      | 0.4   | 0.6    | 0.6                  | 150 | 0.762             | 0.000*    | 0.939    | 0.009*    | 0.028                  | 0.081                  | 0.058                   | -0.053                 | -0.108                 | 100.0   |
| 0.5      | $R_-$            | sharp   | 0.4      | 0.4   | 0.8    | 0.8                  | 82  | 0.702             | 0.000*    | 0.932    | 0.000*    | 0.051                  | 0.081                  | 0.070                   | -0.074                 | -0.108                 | 99.9    |
| 0.5      | $R_-$            | sharp   | 0.4      | 0.6   | 0.3    | 0.3                  | 223 | 0.793             | 0.186     | 0.948    | 0.615     | 0.002                  | 0.011                  | 0.005                   | 0.007                  | -0.013                 | 100.0   |
| 0.5      | $R_-$            | sharp   | 0.4      | 0.6   | 0.6    | 0.6                  | 150 | 0.774             | 0.000*    | 0.939    | 0.007*    | 0.003                  | 0.012                  | 0.008                   | -0.003                 | -0.009                 | 100.0   |
| 0.5      | $R_-$            | sharp   | 0.4      | 0.6   | 0.8    | 0.8                  | 82  | 0.732             | 0.000*    | 0.942    | 0.040*    | 0.006                  | 0.010                  | 0.009                   | 0.006                  | -0.005                 | 99.9    |
| 0.5      | $R_-$            | sharp   | 0.6      | 0.4   | 0.3    | 0.3                  | 223 | 0.783             | 0.013*    | 0.944    | 0.154     | 0.001                  | 0.013                  | 0.004                   | -0.012                 | -0.029                 | 100.0   |
| 0.5      | $R_-$            | sharp   | 0.6      | 0.4   | 0.6    | 0.6                  | 150 | 0.761             | 0.000*    | 0.942    | 0.049*    | 0.004                  | 0.014                  | 0.008                   | -0.017                 | -0.016                 | 100.0   |
| 0.5      | $R_-$            | sharp   | 0.6      | 0.4   | 0.8    | 0.8                  | 82  | 0.719             | 0.000*    | 0.930    | 0.000*    | 0.009                  | 0.009                  | 0.010                   | 0.006                  | -0.006                 | 100.0   |
| 0.5      | $R_-$            | sharp   | 0.6      | 0.6   | 0.3    | 0.3                  | 223 | 0.802             | 0.632     | 0.948    | 0.675     | -0.005                 | -0.058                 | -0.024                  | 0.018                  | 0.084                  | 100.0   |
| 0.5      | $R_-$            | sharp   | 0.6      | 0.6   | 0.6    | 0.6                  | 150 | 0.769             | 0.000*    | 0.938    | 0.004*    | -0.024                 | -0.063                 | -0.046                  | 0.039                  | 0.085                  | 100.0   |
| 0.5      | $R_-$            | sharp   | 0.6      | 0.6   | 0.8    | 0.8                  | 82  | 0.721             | 0.000*    | 0.930    | 0.000*    | -0.041                 | -0.063                 | -0.056                  | 0.073                  | 0.089                  | 99.9    |
| 0.5      | $R_{\perp\perp}$ | cons.   | 0.4      | 0.4   | 0.0    | 0.0                  | 252 | 0.799             | 0.453     | 0.953    | 0.476     | 0.002                  | 0.001                  | -0.003                  | -7.229                 | 2.731                  | 100.0   |
| 0.5      | $R_{\perp\perp}$ | cons.   | 0.4      | 0.4   | 0.0    | 0.0                  | 252 | 0.803             | 0.683     | 0.941    | 0.026*    | -0.001                 | 0.001                  | 0.001                   | 2.719                  | 1.544                  | 100.0   |
| 0.5      | $R_{\perp\perp}$ | cons.   | 0.4      | 0.4   | 0.3    | 0.3                  | 229 | 0.813             | 0.961     | 0.948    | 0.557     | -0.002                 | 0.003                  | -0.003                  | -0.007                 | 0.006                  | 100.0   |
| 0.5      | $R_{\perp\perp}$ | cons.   | 0.4      | 0.4   | 0.3    | 0.3                  | 229 | 0.824             | 1.000     | 0.952    | 0.645     | 0.001                  | -0.001                 | 0.002                   | 0.014                  | 0.012                  | 100.0   |
| 0.5      | $R_{\perp\perp}$ | cons.   | 0.4      | 0.4   | 0.6    | 0.6                  | 161 | 0.824             | 1.000     | 0.947    | 0.503     | -0.001                 | 0.004                  | -0.000                  | -0.002                 | 0.001                  | 100.0   |
| 0.5      | $R_{\perp\perp}$ | cons.   | 0.4      | 0.4   | 0.6    | 0.6                  | 161 | 0.839             | 1.000     | 0.939    | 0.009*    | -0.002                 | -0.003                 | -0.003                  | 0.000                  | -0.003                 | 100.0   |
| 0.5      | $R_{\perp\perp}$ | cons.   | 0.4      | 0.4   | 0.8    | 0.8                  | 91  | 0.843             | 1.000     | 0.946    | 0.315     | -0.003                 | 0.003                  | -0.001                  | 0.004                  | 0.004                  | 100.0   |
| 0.5      | $R_{\perp\perp}$ | cons.   | 0.4      | 0.4   | 0.8    | 0.8                  | 91  | 0.848             | 1.000     | 0.932    | 0.000*    | 0.003                  | 0.002                  | 0.002                   | 0.013                  | 0.007                  | 100.0   |
| 0.5      | $R_{\perp\perp}$ | cons.   | 0.4      | 0.6   | 0.0    | 0.0                  | 252 | 0.804             | 0.730     | 0.944    | 0.154     | 0.003                  | 0.002                  | -0.002                  | 3.037                  | 0.143                  | 100.0   |
| 0.5      | $R_{\perp\perp}$ | cons.   | 0.4      | 0.6   | 0.0    | 0.0                  | 252 | 0.812             | 0.957     | 0.947    | 0.451     | 0.004                  | -0.002                 | 0.002                   | -2.027                 | -7.197                 | 100.0   |
| 0.5      | $R_{\perp\perp}$ | cons.   | 0.4      | 0.6   | 0.3    | 0.3                  | 229 | 0.805             | 0.745     | 0.945    | 0.180     | 0.002                  | -0.002                 | 0.003                   | 0.008                  | 0.004                  | 100.0   |
| 0.5      | $R_{\perp\perp}$ | cons.   | 0.4      | 0.6   | 0.3    | 0.3                  | 229 | 0.818             | 0.994     | 0.945    | 0.209     | -0.002                 | 0.001                  | 0.002                   | -0.005                 | -0.001                 | 100.0   |
| 0.5      | $R_{\perp\perp}$ | cons.   | 0.4      | 0.6   | 0.6    | 0.6                  | 161 | 0.823             | 0.999     | 0.942    | 0.059     | 0.004                  | 0.003                  | 0.005                   | -0.004                 | -0.007                 | 100.0   |
| 0.5      | $R_{\perp\perp}$ | cons.   | 0.4      | 0.6   | 0.6    | 0.6                  | 161 | 0.844             | 1.000     | 0.943    | 0.086     | 0.001                  | 0.002                  | -0.001                  | 0.018                  | 0.024                  | 100.0   |
| 0.5      | $R_{\perp\perp}$ | cons.   | 0.4      | 0.6   | 0.8    | 0.8                  | 91  | 0.833             | 1.000     | 0.939    | 0.009*    | -0.006                 | -0.006                 | -0.006                  | -0.001                 | -0.001                 | 100.0   |
| 0.5      | $R_{\perp\perp}$ | cons.   | 0.4      | 0.6   | 0.8    | 0.8                  | 91  | 0.847             | 1.000     | 0.929    | 0.000*    | -0.000                 | 0.001                  | -0.002                  | -0.105                 | -0.102                 | 99.9    |
| 0.5      | $R_{\perp\perp}$ | cons.   | 0.6      | 0.4   | 0.0    | 0.0                  | 252 | 0.795             | 0.239     | 0.937    | 0.001*    | -0.003                 | -0.002                 | 0.002                   | -7.906                 | 1.927                  | 100.0   |

Continued on next page



Additional simulation results for design I when working assumptions A1 and A2 are satisfied

| $\delta$ | Response         | Formula | $r_{-1}$ | $r_1$ | $\rho$ | $\rho_{\text{size}}$ | $n$ | $1 - \hat{\beta}$ | $p$ value | Coverage | $p$ value | $\text{Cor}(R, Y_0^2)$ | $\text{Cor}(R, Y_1^2)$ | $\text{Cor}(R, Y_0Y_1)$ | $\text{Cov}(Y_0, Y_2)$ | $\text{Cov}(Y_1, Y_2)$ | % Valid |
|----------|------------------|---------|----------|-------|--------|----------------------|-----|-------------------|-----------|----------|-----------|------------------------|------------------------|-------------------------|------------------------|------------------------|---------|
| 0.5      | $R_{\perp\perp}$ | cons.   | 0.6      | 0.4   | 0.0    | 0.0                  | 252 | 0.799             | 0.453     | 0.943    | 0.086     | 0.002                  | 0.003                  | 0.002                   | 0.033                  | 0.948                  | 100.0   |
| 0.5      | $R_{\perp\perp}$ | cons.   | 0.6      | 0.4   | 0.3    | 0.3                  | 229 | 0.805             | 0.745     | 0.942    | 0.040*    | -0.002                 | 0.002                  | -0.003                  | -0.010                 | 0.013                  | 100.0   |
| 0.5      | $R_{\perp\perp}$ | cons.   | 0.6      | 0.4   | 0.3    | 0.3                  | 229 | 0.817             | 0.990     | 0.939    | 0.006*    | 0.003                  | 0.002                  | 0.002                   | 0.022                  | 0.025                  | 100.0   |
| 0.5      | $R_{\perp\perp}$ | cons.   | 0.6      | 0.4   | 0.6    | 0.6                  | 161 | 0.827             | 1.000     | 0.942    | 0.049*    | -0.004                 | -0.003                 | -0.005                  | -0.009                 | -0.009                 | 100.0   |
| 0.5      | $R_{\perp\perp}$ | cons.   | 0.6      | 0.4   | 0.6    | 0.6                  | 161 | 0.836             | 1.000     | 0.943    | 0.086     | 0.001                  | -0.002                 | -0.001                  | 0.010                  | 0.014                  | 100.0   |
| 0.5      | $R_{\perp\perp}$ | cons.   | 0.6      | 0.4   | 0.8    | 0.8                  | 91  | 0.837             | 1.000     | 0.941    | 0.033*    | 0.006                  | 0.006                  | 0.006                   | 0.004                  | 0.004                  | 100.0   |
| 0.5      | $R_{\perp\perp}$ | cons.   | 0.6      | 0.4   | 0.8    | 0.8                  | 91  | 0.848             | 1.000     | 0.933    | 0.000*    | -0.004                 | 0.002                  | -0.003                  | -0.099                 | -0.095                 | 100.0   |
| 0.5      | $R_{\perp\perp}$ | cons.   | 0.6      | 0.6   | 0.0    | 0.0                  | 252 | 0.796             | 0.283     | 0.941    | 0.026*    | -0.002                 | -0.001                 | 0.003                   | 110.092                | -0.705                 | 100.0   |
| 0.5      | $R_{\perp\perp}$ | cons.   | 0.6      | 0.6   | 0.0    | 0.0                  | 252 | 0.803             | 0.683     | 0.944    | 0.132     | -0.000                 | 0.002                  | 0.003                   | -1.441                 | -0.691                 | 100.0   |
| 0.5      | $R_{\perp\perp}$ | cons.   | 0.6      | 0.6   | 0.3    | 0.3                  | 229 | 0.817             | 0.991     | 0.944    | 0.154     | 0.002                  | -0.003                 | 0.003                   | 0.028                  | 0.017                  | 100.0   |
| 0.5      | $R_{\perp\perp}$ | cons.   | 0.6      | 0.6   | 0.3    | 0.3                  | 229 | 0.819             | 0.997     | 0.950    | 0.967     | -0.001                 | -0.003                 | -0.002                  | -0.003                 | 0.006                  | 100.0   |
| 0.5      | $R_{\perp\perp}$ | cons.   | 0.6      | 0.6   | 0.6    | 0.6                  | 161 | 0.838             | 1.000     | 0.948    | 0.557     | 0.001                  | -0.004                 | 0.000                   | -0.004                 | -0.006                 | 100.0   |
| 0.5      | $R_{\perp\perp}$ | cons.   | 0.6      | 0.6   | 0.6    | 0.6                  | 161 | 0.833             | 1.000     | 0.949    | 0.737     | 0.004                  | 0.001                  | 0.001                   | 0.031                  | 0.025                  | 100.0   |
| 0.5      | $R_{\perp\perp}$ | cons.   | 0.6      | 0.6   | 0.8    | 0.8                  | 91  | 0.835             | 1.000     | 0.935    | 0.000*    | 0.003                  | -0.003                 | 0.001                   | -0.003                 | -0.008                 | 100.0   |
| 0.5      | $R_{\perp\perp}$ | cons.   | 0.6      | 0.6   | 0.8    | 0.8                  | 91  | 0.844             | 1.000     | 0.940    | 0.012*    | 0.005                  | 0.003                  | 0.003                   | -0.176                 | -0.177                 | 100.0   |
| 0.5      | $R_{\perp\perp}$ | sharp   | 0.4      | 0.4   | 0.3    | 0.3                  | 223 | 0.808             | 0.858     | 0.943    | 0.094     | 0.002                  | 0.002                  | 0.002                   | 0.016                  | 0.020                  | 100.0   |
| 0.5      | $R_{\perp\perp}$ | sharp   | 0.4      | 0.4   | 0.3    | 0.3                  | 223 | 0.798             | 0.382     | 0.942    | 0.049*    | -0.004                 | -0.001                 | -0.002                  | -0.020                 | -0.014                 | 100.0   |
| 0.5      | $R_{\perp\perp}$ | sharp   | 0.4      | 0.4   | 0.6    | 0.6                  | 150 | 0.815             | 0.984     | 0.951    | 0.769     | 0.002                  | -0.001                 | 0.002                   | 0.006                  | 0.006                  | 100.0   |
| 0.5      | $R_{\perp\perp}$ | sharp   | 0.4      | 0.4   | 0.6    | 0.6                  | 150 | 0.789             | 0.064     | 0.936    | 0.001*    | 0.001                  | 0.002                  | 0.001                   | 0.002                  | 0.000                  | 100.0   |
| 0.5      | $R_{\perp\perp}$ | sharp   | 0.4      | 0.4   | 0.8    | 0.8                  | 82  | 0.802             | 0.639     | 0.935    | 0.000*    | 0.001                  | 0.002                  | 0.001                   | 0.013                  | 0.014                  | 99.9    |
| 0.5      | $R_{\perp\perp}$ | sharp   | 0.4      | 0.4   | 0.8    | 0.8                  | 82  | 0.808             | 0.867     | 0.940    | 0.011*    | 0.002                  | 0.002                  | 0.002                   | -0.004                 | -0.002                 | 100.0   |
| 0.5      | $R_{\perp\perp}$ | sharp   | 0.4      | 0.6   | 0.3    | 0.3                  | 223 | 0.821             | 0.998     | 0.956    | 0.167     | -0.003                 | -0.002                 | -0.004                  | 0.014                  | 0.019                  | 100.0   |
| 0.5      | $R_{\perp\perp}$ | sharp   | 0.4      | 0.6   | 0.3    | 0.3                  | 223 | 0.815             | 0.980     | 0.946    | 0.315     | -0.001                 | -0.003                 | 0.002                   | -0.007                 | -0.014                 | 100.0   |
| 0.5      | $R_{\perp\perp}$ | sharp   | 0.4      | 0.6   | 0.6    | 0.6                  | 150 | 0.811             | 0.943     | 0.939    | 0.009*    | 0.002                  | 0.001                  | 0.002                   | 0.033                  | 0.025                  | 100.0   |
| 0.5      | $R_{\perp\perp}$ | sharp   | 0.4      | 0.6   | 0.6    | 0.6                  | 150 | 0.808             | 0.869     | 0.949    | 0.867     | -0.003                 | 0.002                  | -0.001                  | -0.010                 | -0.002                 | 100.0   |
| 0.5      | $R_{\perp\perp}$ | sharp   | 0.4      | 0.6   | 0.8    | 0.8                  | 82  | 0.807             | 0.823     | 0.942    | 0.040*    | -0.002                 | 0.001                  | 0.001                   | -0.095                 | -0.091                 | 100.0   |
| 0.5      | $R_{\perp\perp}$ | sharp   | 0.4      | 0.6   | 0.8    | 0.8                  | 82  | 0.807             | 0.823     | 0.941    | 0.026*    | -0.002                 | 0.003                  | 0.002                   | 0.006                  | 0.012                  | 100.0   |
| 0.5      | $R_{\perp\perp}$ | sharp   | 0.6      | 0.4   | 0.3    | 0.3                  | 223 | 0.802             | 0.615     | 0.945    | 0.180     | -0.000                 | -0.002                 | -0.002                  | 0.013                  | 0.014                  | 100.0   |
| 0.5      | $R_{\perp\perp}$ | sharp   | 0.6      | 0.4   | 0.3    | 0.3                  | 223 | 0.805             | 0.774     | 0.950    | 0.967     | 0.001                  | 0.003                  | -0.002                  | -0.015                 | -0.006                 | 100.0   |
| 0.5      | $R_{\perp\perp}$ | sharp   | 0.6      | 0.4   | 0.6    | 0.6                  | 150 | 0.804             | 0.715     | 0.940    | 0.013*    | -0.001                 | -0.001                 | -0.001                  | 0.014                  | 0.012                  | 100.0   |
| 0.5      | $R_{\perp\perp}$ | sharp   | 0.6      | 0.4   | 0.6    | 0.6                  | 150 | 0.799             | 0.435     | 0.943    | 0.094     | 0.003                  | -0.002                 | 0.001                   | 0.005                  | 0.001                  | 100.0   |
| 0.5      | $R_{\perp\perp}$ | sharp   | 0.6      | 0.4   | 0.8    | 0.8                  | 82  | 0.819             | 0.995     | 0.935    | 0.000*    | -0.003                 | 0.002                  | 0.003                   | -0.088                 | -0.084                 | 100.0   |
| 0.5      | $R_{\perp\perp}$ | sharp   | 0.6      | 0.4   | 0.8    | 0.8                  | 82  | 0.792             | 0.156     | 0.932    | 0.000*    | 0.002                  | -0.003                 | -0.002                  | -0.008                 | -0.010                 | 99.9    |
| 0.5      | $R_{\perp\perp}$ | sharp   | 0.6      | 0.6   | 0.3    | 0.3                  | 223 | 0.802             | 0.632     | 0.943    | 0.086     | 0.001                  | 0.003                  | -0.000                  | 0.031                  | 0.025                  | 100.0   |
| 0.5      | $R_{\perp\perp}$ | sharp   | 0.6      | 0.6   | 0.3    | 0.3                  | 223 | 0.806             | 0.813     | 0.950    | 1.000     | 0.004                  | 0.001                  | 0.002                   | 0.002                  | -0.004                 | 100.0   |
| 0.5      | $R_{\perp\perp}$ | sharp   | 0.6      | 0.6   | 0.6    | 0.6                  | 150 | 0.808             | 0.858     | 0.946    | 0.276     | 0.001                  | -0.003                 | -0.002                  | 0.023                  | 0.020                  | 100.0   |
| 0.5      | $R_{\perp\perp}$ | sharp   | 0.6      | 0.6   | 0.6    | 0.6                  | 150 | 0.818             | 0.993     | 0.939    | 0.007*    | -0.001                 | -0.002                 | -0.001                  | 0.004                  | 0.005                  | 100.0   |
| 0.5      | $R_{\perp\perp}$ | sharp   | 0.6      | 0.6   | 0.8    | 0.8                  | 82  | 0.795             | 0.265     | 0.930    | 0.000*    | 0.005                  | 0.005                  | 0.006                   | -0.181                 | -0.179                 | 100.0   |
| 0.5      | $R_{\perp\perp}$ | sharp   | 0.6      | 0.6   | 0.8    | 0.8                  | 82  | 0.802             | 0.615     | 0.932    | 0.000*    | -0.002                 | -0.002                 | -0.002                  | 0.006                  | 0.012                  | 100.0   |

**Table S5:** Additional simulation results for design I when working assumption A1(a) is violated: responders' end-of-study variance is 25% below the appropriate lower bound.

| $\delta$ | Response         | Formula | $r_{-1}$ | $r_1$ | $\rho$ | $\rho_{\text{size}}$ | $n$ | $1 - \hat{\beta}$ | $p$ value | Coverage | $p$ value | $\text{Cor}(R, Y_0^2)$ | $\text{Cor}(R, Y_1^2)$ | $\text{Cor}(R, Y_0Y_1)$ | $\text{Cov}(Y_0, Y_2)$ | $\text{Cov}(Y_1, Y_2)$ | % Valid |
|----------|------------------|---------|----------|-------|--------|----------------------|-----|-------------------|-----------|----------|-----------|------------------------|------------------------|-------------------------|------------------------|------------------------|---------|
| 0.3      | $R_+$            | cons.   | 0.4      | 0.4   | 0.0    | 0.0                  | 698 | 0.798             | 0.417     | 0.951    | 0.769     | 0.001                  | 0.077                  | -0.001                  | -2.236                 | 14.730                 | 100.0   |
| 0.3      | $R_+$            | cons.   | 0.4      | 0.4   | 0.3    | 0.3                  | 635 | 0.820             | 0.998     | 0.947    | 0.451     | 0.008                  | 0.078                  | 0.032                   | -0.014                 | -0.100                 | 100.0   |
| 0.3      | $R_+$            | cons.   | 0.4      | 0.4   | 0.6    | 0.6                  | 447 | 0.865             | 1.000     | 0.948    | 0.615     | 0.028                  | 0.078                  | 0.057                   | -0.050                 | -0.098                 | 100.0   |
| 0.3      | $R_+$            | cons.   | 0.4      | 0.6   | 0.0    | 0.0                  | 698 | 0.788             | 0.058     | 0.947    | 0.451     | -0.001                 | 0.012                  | -0.001                  | -110.062               | -1.869                 | 100.0   |
| 0.3      | $R_+$            | cons.   | 0.4      | 0.6   | 0.3    | 0.3                  | 635 | 0.832             | 1.000     | 0.955    | 0.258     | 0.002                  | 0.009                  | 0.005                   | -0.002                 | -0.015                 | 100.0   |
| 0.3      | $R_+$            | cons.   | 0.4      | 0.6   | 0.6    | 0.6                  | 447 | 0.848             | 1.000     | 0.943    | 0.071     | 0.003                  | 0.010                  | 0.009                   | -0.003                 | -0.009                 | 100.0   |
| 0.3      | $R_+$            | cons.   | 0.6      | 0.4   | 0.0    | 0.0                  | 698 | 0.790             | 0.090     | 0.943    | 0.071     | 0.001                  | 0.011                  | -0.001                  | -0.117                 | -2.392                 | 100.0   |
| 0.3      | $R_+$            | cons.   | 0.6      | 0.4   | 0.3    | 0.3                  | 635 | 0.829             | 1.000     | 0.953    | 0.476     | 0.001                  | 0.009                  | 0.004                   | 0.002                  | 0.005                  | 100.0   |
| 0.3      | $R_+$            | cons.   | 0.6      | 0.4   | 0.6    | 0.6                  | 447 | 0.872             | 1.000     | 0.937    | 0.002*    | 0.003                  | 0.009                  | 0.007                   | -0.006                 | -0.008                 | 100.0   |
| 0.3      | $R_+$            | cons.   | 0.6      | 0.6   | 0.0    | 0.0                  | 698 | 0.800             | 0.525     | 0.946    | 0.315     | -0.001                 | -0.061                 | -0.001                  | -3.828                 | -1.827                 | 100.0   |
| 0.3      | $R_+$            | cons.   | 0.6      | 0.6   | 0.3    | 0.3                  | 635 | 0.824             | 1.000     | 0.949    | 0.801     | -0.006                 | -0.061                 | -0.024                  | 0.022                  | 0.075                  | 100.0   |
| 0.3      | $R_+$            | cons.   | 0.6      | 0.6   | 0.6    | 0.6                  | 447 | 0.859             | 1.000     | 0.946    | 0.276     | -0.022                 | -0.061                 | -0.044                  | 0.039                  | 0.085                  | 100.0   |
| 0.3      | $R_+$            | sharp   | 0.4      | 0.4   | 0.3    | 0.3                  | 618 | 0.816             | 0.987     | 0.949    | 0.867     | 0.007                  | 0.078                  | 0.032                   | -0.023                 | -0.098                 | 100.0   |
| 0.3      | $R_+$            | sharp   | 0.4      | 0.4   | 0.6    | 0.6                  | 416 | 0.851             | 1.000     | 0.942    | 0.040*    | 0.030                  | 0.078                  | 0.058                   | -0.050                 | -0.097                 | 100.0   |
| 0.3      | $R_+$            | sharp   | 0.4      | 0.6   | 0.3    | 0.3                  | 618 | 0.802             | 0.632     | 0.946    | 0.315     | 0.002                  | 0.010                  | 0.005                   | 0.004                  | -0.005                 | 100.0   |
| 0.3      | $R_+$            | sharp   | 0.4      | 0.6   | 0.6    | 0.6                  | 416 | 0.824             | 1.000     | 0.946    | 0.357     | 0.003                  | 0.008                  | 0.007                   | -0.006                 | -0.011                 | 100.0   |
| 0.3      | $R_+$            | sharp   | 0.6      | 0.4   | 0.3    | 0.3                  | 618 | 0.809             | 0.896     | 0.948    | 0.557     | 0.003                  | 0.011                  | 0.006                   | -0.004                 | -0.012                 | 100.0   |
| 0.3      | $R_+$            | sharp   | 0.6      | 0.4   | 0.6    | 0.6                  | 416 | 0.854             | 1.000     | 0.951    | 0.900     | 0.006                  | 0.009                  | 0.007                   | 0.004                  | -0.006                 | 100.0   |
| 0.3      | $R_+$            | sharp   | 0.6      | 0.6   | 0.3    | 0.3                  | 618 | 0.816             | 0.989     | 0.942    | 0.040*    | -0.005                 | -0.059                 | -0.023                  | 0.013                  | 0.079                  | 100.0   |
| 0.3      | $R_+$            | sharp   | 0.6      | 0.6   | 0.6    | 0.6                  | 416 | 0.837             | 1.000     | 0.951    | 0.900     | -0.022                 | -0.061                 | -0.044                  | 0.043                  | 0.079                  | 100.0   |
| 0.3      | $R_-$            | cons.   | 0.4      | 0.4   | 0.0    | 0.0                  | 698 | 0.801             | 0.562     | 0.957    | 0.079     | 0.001                  | 0.079                  | 0.001                   | 1.663                  | -2.520                 | 100.0   |
| 0.3      | $R_-$            | cons.   | 0.4      | 0.4   | 0.3    | 0.3                  | 635 | 0.792             | 0.132     | 0.953    | 0.426     | 0.008                  | 0.079                  | 0.031                   | -0.021                 | -0.101                 | 100.0   |
| 0.3      | $R_-$            | cons.   | 0.4      | 0.4   | 0.6    | 0.6                  | 447 | 0.757             | 0.000*    | 0.949    | 0.801     | 0.027                  | 0.079                  | 0.057                   | -0.051                 | -0.101                 | 100.0   |
| 0.3      | $R_-$            | cons.   | 0.4      | 0.6   | 0.0    | 0.0                  | 698 | 0.795             | 0.239     | 0.953    | 0.476     | -0.001                 | 0.013                  | 0.001                   | -0.829                 | 1.477                  | 100.0   |
| 0.3      | $R_-$            | cons.   | 0.4      | 0.6   | 0.3    | 0.3                  | 635 | 0.794             | 0.199     | 0.950    | 0.967     | 0.002                  | 0.011                  | 0.003                   | -0.015                 | -0.006                 | 100.0   |
| 0.3      | $R_-$            | cons.   | 0.4      | 0.6   | 0.6    | 0.6                  | 447 | 0.786             | 0.033*    | 0.945    | 0.180     | 0.004                  | 0.010                  | 0.007                   | -0.000                 | -0.005                 | 100.0   |
| 0.3      | $R_-$            | cons.   | 0.6      | 0.4   | 0.0    | 0.0                  | 698 | 0.797             | 0.365     | 0.947    | 0.503     | 0.001                  | 0.014                  | 0.001                   | 1.385                  | -18.011                | 100.0   |
| 0.3      | $R_-$            | cons.   | 0.6      | 0.4   | 0.3    | 0.3                  | 635 | 0.774             | 0.000*    | 0.946    | 0.357     | 0.000                  | 0.010                  | 0.002                   | -0.002                 | -0.018                 | 100.0   |
| 0.3      | $R_-$            | cons.   | 0.6      | 0.4   | 0.6    | 0.6                  | 447 | 0.764             | 0.000*    | 0.945    | 0.241     | 0.004                  | 0.010                  | 0.007                   | -0.011                 | -0.015                 | 100.0   |
| 0.3      | $R_-$            | cons.   | 0.6      | 0.6   | 0.0    | 0.0                  | 698 | 0.801             | 0.544     | 0.950    | 0.933     | -0.001                 | -0.059                 | 0.001                   | 2.766                  | -1.095                 | 100.0   |
| 0.3      | $R_-$            | cons.   | 0.6      | 0.6   | 0.3    | 0.3                  | 635 | 0.789             | 0.064     | 0.944    | 0.154     | -0.006                 | -0.060                 | -0.025                  | 0.025                  | 0.088                  | 100.0   |
| 0.3      | $R_-$            | cons.   | 0.6      | 0.6   | 0.6    | 0.6                  | 447 | 0.781             | 0.005*    | 0.945    | 0.180     | -0.021                 | -0.060                 | -0.044                  | 0.042                  | 0.084                  | 100.0   |
| 0.3      | $R_-$            | sharp   | 0.4      | 0.4   | 0.3    | 0.3                  | 618 | 0.762             | 0.000*    | 0.947    | 0.503     | 0.007                  | 0.078                  | 0.031                   | -0.025                 | -0.103                 | 100.0   |
| 0.3      | $R_-$            | sharp   | 0.4      | 0.4   | 0.6    | 0.6                  | 416 | 0.738             | 0.000*    | 0.941    | 0.021*    | 0.028                  | 0.079                  | 0.057                   | -0.051                 | -0.102                 | 100.0   |
| 0.3      | $R_-$            | sharp   | 0.4      | 0.6   | 0.3    | 0.3                  | 618 | 0.776             | 0.001*    | 0.945    | 0.180     | 0.001                  | 0.010                  | 0.004                   | -0.014                 | -0.011                 | 100.0   |
| 0.3      | $R_-$            | sharp   | 0.4      | 0.6   | 0.6    | 0.6                  | 416 | 0.765             | 0.000*    | 0.947    | 0.451     | 0.005                  | 0.010                  | 0.007                   | -0.001                 | -0.006                 | 100.0   |
| 0.3      | $R_-$            | sharp   | 0.6      | 0.4   | 0.3    | 0.3                  | 618 | 0.757             | 0.000*    | 0.950    | 0.967     | 0.002                  | 0.009                  | 0.003                   | -0.002                 | -0.010                 | 100.0   |
| 0.3      | $R_-$            | sharp   | 0.6      | 0.4   | 0.6    | 0.6                  | 416 | 0.718             | 0.000*    | 0.947    | 0.503     | 0.004                  | 0.010                  | 0.008                   | -0.004                 | -0.009                 | 100.0   |
| 0.3      | $R_-$            | sharp   | 0.6      | 0.6   | 0.3    | 0.3                  | 618 | 0.775             | 0.000*    | 0.950    | 0.933     | -0.006                 | -0.061                 | -0.026                  | 0.019                  | 0.078                  | 100.0   |
| 0.3      | $R_-$            | sharp   | 0.6      | 0.6   | 0.6    | 0.6                  | 416 | 0.760             | 0.000*    | 0.954    | 0.295     | -0.023                 | -0.059                 | -0.045                  | 0.042                  | 0.082                  | 100.0   |
| 0.3      | $R_{\perp\perp}$ | cons.   | 0.4      | 0.4   | 0.0    | 0.0                  | 698 | 0.797             | 0.365     | 0.943    | 0.094     | -0.000                 | -0.001                 | 0.001                   | 0.565                  | -0.696                 | 100.0   |
| 0.3      | $R_{\perp\perp}$ | cons.   | 0.4      | 0.4   | 0.0    | 0.0                  | 698 | 0.797             | 0.365     | 0.943    | 0.094     | -0.000                 | -0.001                 | 0.001                   | 0.565                  | -0.696                 | 100.0   |
| 0.3      | $R_{\perp\perp}$ | cons.   | 0.4      | 0.4   | 0.3    | 0.3                  | 635 | 0.818             | 0.993     | 0.949    | 0.867     | 0.002                  | 0.000                  | -0.000                  | -0.001                 | 0.004                  | 100.0   |
| 0.3      | $R_{\perp\perp}$ | cons.   | 0.4      | 0.4   | 0.3    | 0.3                  | 635 | 0.818             | 0.993     | 0.949    | 0.867     | 0.002                  | 0.000                  | -0.000                  | -0.001                 | 0.004                  | 100.0   |
| 0.3      | $R_{\perp\perp}$ | cons.   | 0.4      | 0.4   | 0.6    | 0.6                  | 447 | 0.811             | 0.938     | 0.939    | 0.007*    | 0.001                  | -0.001                 | 0.000                   | -0.001                 | -0.005                 | 100.0   |
| 0.3      | $R_{\perp\perp}$ | cons.   | 0.4      | 0.4   | 0.6    | 0.6                  | 447 | 0.811             | 0.938     | 0.939    | 0.007*    | 0.001                  | -0.001                 | 0.000                   | -0.001                 | -0.005                 | 100.0   |

Continued on next page

Additional simulation results for design I when working assumption A1(a) is violated: responders' end-of-study variance is 25% below the appropriate lower bound.

| $\delta$ | Response         | Formula | $r_{-1}$ | $r_1$ | $\rho$ | $\rho_{\text{size}}$ | $n$ | $1 - \hat{\beta}$ | $p$ value | Coverage | $p$ value | $\text{Cor}(R, Y_0^2)$ | $\text{Cor}(R, Y_1^2)$ | $\text{Cor}(R, Y_0Y_1)$ | $\text{Cov}(Y_0, Y_2)$ | $\text{Cov}(Y_1, Y_2)$ | % Valid |
|----------|------------------|---------|----------|-------|--------|----------------------|-----|-------------------|-----------|----------|-----------|------------------------|------------------------|-------------------------|------------------------|------------------------|---------|
| 0.3      | $R_{\perp\perp}$ | cons.   | 0.4      | 0.6   | 0.0    | 0.0                  | 698 | 0.800             | 0.507     | 0.954    | 0.295     | -0.001                 | -0.000                 | 0.002                   | 1.618                  | -1.290                 | 100.0   |
| 0.3      | $R_{\perp\perp}$ | cons.   | 0.4      | 0.6   | 0.0    | 0.0                  | 698 | 0.800             | 0.507     | 0.954    | 0.295     | -0.001                 | -0.000                 | 0.002                   | 1.618                  | -1.290                 | 100.0   |
| 0.3      | $R_{\perp\perp}$ | cons.   | 0.4      | 0.6   | 0.3    | 0.3                  | 635 | 0.797             | 0.331     | 0.945    | 0.241     | 0.000                  | 0.001                  | -0.001                  | -0.003                 | 0.012                  | 100.0   |
| 0.3      | $R_{\perp\perp}$ | cons.   | 0.4      | 0.6   | 0.3    | 0.3                  | 635 | 0.797             | 0.331     | 0.945    | 0.241     | 0.000                  | 0.001                  | -0.001                  | -0.003                 | 0.012                  | 100.0   |
| 0.3      | $R_{\perp\perp}$ | cons.   | 0.4      | 0.6   | 0.6    | 0.6                  | 447 | 0.821             | 0.999     | 0.947    | 0.402     | 0.002                  | -0.002                 | 0.002                   | 0.001                  | 0.001                  | 100.0   |
| 0.3      | $R_{\perp\perp}$ | cons.   | 0.4      | 0.6   | 0.6    | 0.6                  | 447 | 0.821             | 0.999     | 0.947    | 0.402     | 0.002                  | -0.002                 | 0.002                   | 0.001                  | 0.001                  | 100.0   |
| 0.3      | $R_{\perp\perp}$ | cons.   | 0.6      | 0.4   | 0.0    | 0.0                  | 698 | 0.791             | 0.114     | 0.948    | 0.557     | 0.001                  | 0.000                  | -0.002                  | 1.619                  | -0.947                 | 100.0   |
| 0.3      | $R_{\perp\perp}$ | cons.   | 0.6      | 0.4   | 0.0    | 0.0                  | 698 | 0.791             | 0.114     | 0.948    | 0.557     | 0.001                  | 0.000                  | -0.002                  | 1.619                  | -0.947                 | 100.0   |
| 0.3      | $R_{\perp\perp}$ | cons.   | 0.6      | 0.4   | 0.3    | 0.3                  | 635 | 0.799             | 0.471     | 0.948    | 0.557     | -0.000                 | -0.001                 | 0.001                   | 0.001                  | 0.007                  | 100.0   |
| 0.3      | $R_{\perp\perp}$ | cons.   | 0.6      | 0.4   | 0.3    | 0.3                  | 635 | 0.799             | 0.471     | 0.948    | 0.557     | -0.000                 | -0.001                 | 0.001                   | 0.001                  | 0.007                  | 100.0   |
| 0.3      | $R_{\perp\perp}$ | cons.   | 0.6      | 0.4   | 0.6    | 0.6                  | 447 | 0.809             | 0.887     | 0.942    | 0.059     | -0.002                 | 0.002                  | -0.002                  | -0.001                 | 0.002                  | 100.0   |
| 0.3      | $R_{\perp\perp}$ | cons.   | 0.6      | 0.4   | 0.6    | 0.6                  | 447 | 0.809             | 0.887     | 0.942    | 0.059     | -0.002                 | 0.002                  | -0.002                  | -0.001                 | 0.002                  | 100.0   |
| 0.3      | $R_{\perp\perp}$ | cons.   | 0.6      | 0.6   | 0.0    | 0.0                  | 698 | 0.789             | 0.070     | 0.945    | 0.209     | 0.000                  | 0.001                  | -0.001                  | 1.525                  | -1.227                 | 100.0   |
| 0.3      | $R_{\perp\perp}$ | cons.   | 0.6      | 0.6   | 0.0    | 0.0                  | 698 | 0.789             | 0.070     | 0.945    | 0.209     | 0.000                  | 0.001                  | -0.001                  | 1.525                  | -1.227                 | 100.0   |
| 0.3      | $R_{\perp\perp}$ | cons.   | 0.6      | 0.6   | 0.3    | 0.3                  | 635 | 0.809             | 0.896     | 0.951    | 0.900     | -0.002                 | -0.000                 | 0.000                   | -0.010                 | 0.001                  | 100.0   |
| 0.3      | $R_{\perp\perp}$ | cons.   | 0.6      | 0.6   | 0.3    | 0.3                  | 635 | 0.809             | 0.896     | 0.951    | 0.900     | -0.002                 | -0.000                 | 0.000                   | -0.010                 | 0.001                  | 100.0   |
| 0.3      | $R_{\perp\perp}$ | cons.   | 0.6      | 0.6   | 0.6    | 0.6                  | 447 | 0.825             | 1.000     | 0.942    | 0.040*    | -0.001                 | 0.001                  | -0.000                  | 0.002                  | 0.007                  | 100.0   |
| 0.3      | $R_{\perp\perp}$ | cons.   | 0.6      | 0.6   | 0.6    | 0.6                  | 447 | 0.825             | 1.000     | 0.942    | 0.040*    | -0.001                 | 0.001                  | -0.000                  | 0.002                  | 0.007                  | 100.0   |
| 0.3      | $R_{\perp\perp}$ | sharp   | 0.4      | 0.4   | 0.3    | 0.3                  | 618 | 0.800             | 0.525     | 0.947    | 0.503     | -0.001                 | 0.001                  | 0.001                   | -0.004                 | 0.005                  | 100.0   |
| 0.3      | $R_{\perp\perp}$ | sharp   | 0.4      | 0.4   | 0.3    | 0.3                  | 618 | 0.800             | 0.525     | 0.947    | 0.503     | -0.001                 | 0.001                  | 0.001                   | -0.004                 | 0.005                  | 100.0   |
| 0.3      | $R_{\perp\perp}$ | sharp   | 0.4      | 0.4   | 0.6    | 0.6                  | 416 | 0.793             | 0.186     | 0.957    | 0.102     | 0.002                  | -0.002                 | 0.002                   | 0.003                  | -0.000                 | 100.0   |
| 0.3      | $R_{\perp\perp}$ | sharp   | 0.4      | 0.4   | 0.6    | 0.6                  | 416 | 0.793             | 0.186     | 0.957    | 0.102     | 0.002                  | -0.002                 | 0.002                   | 0.003                  | -0.000                 | 100.0   |
| 0.3      | $R_{\perp\perp}$ | sharp   | 0.4      | 0.6   | 0.3    | 0.3                  | 618 | 0.787             | 0.044*    | 0.946    | 0.276     | -0.001                 | -0.002                 | -0.002                  | -0.014                 | -0.007                 | 100.0   |
| 0.3      | $R_{\perp\perp}$ | sharp   | 0.4      | 0.6   | 0.3    | 0.3                  | 618 | 0.787             | 0.044*    | 0.946    | 0.276     | -0.001                 | -0.002                 | -0.002                  | -0.014                 | -0.007                 | 100.0   |
| 0.3      | $R_{\perp\perp}$ | sharp   | 0.4      | 0.6   | 0.6    | 0.6                  | 416 | 0.788             | 0.058     | 0.943    | 0.086     | -0.003                 | -0.002                 | -0.002                  | -0.009                 | -0.005                 | 100.0   |
| 0.3      | $R_{\perp\perp}$ | sharp   | 0.4      | 0.6   | 0.6    | 0.6                  | 416 | 0.788             | 0.058     | 0.943    | 0.086     | -0.003                 | -0.002                 | -0.002                  | -0.009                 | -0.005                 | 100.0   |
| 0.3      | $R_{\perp\perp}$ | sharp   | 0.6      | 0.4   | 0.3    | 0.3                  | 618 | 0.790             | 0.090     | 0.938    | 0.003*    | 0.001                  | 0.002                  | 0.002                   | 0.004                  | 0.005                  | 100.0   |
| 0.3      | $R_{\perp\perp}$ | sharp   | 0.6      | 0.4   | 0.3    | 0.3                  | 618 | 0.790             | 0.090     | 0.938    | 0.003*    | 0.001                  | 0.002                  | 0.002                   | 0.004                  | 0.005                  | 100.0   |
| 0.3      | $R_{\perp\perp}$ | sharp   | 0.6      | 0.4   | 0.6    | 0.6                  | 416 | 0.787             | 0.044*    | 0.948    | 0.615     | 0.003                  | 0.002                  | 0.002                   | 0.008                  | 0.002                  | 100.0   |
| 0.3      | $R_{\perp\perp}$ | sharp   | 0.6      | 0.4   | 0.6    | 0.6                  | 416 | 0.787             | 0.044*    | 0.948    | 0.615     | 0.003                  | 0.002                  | 0.002                   | 0.008                  | 0.002                  | 100.0   |
| 0.3      | $R_{\perp\perp}$ | sharp   | 0.6      | 0.6   | 0.3    | 0.3                  | 618 | 0.791             | 0.114     | 0.948    | 0.675     | 0.001                  | -0.001                 | -0.001                  | 0.001                  | -0.002                 | 100.0   |
| 0.3      | $R_{\perp\perp}$ | sharp   | 0.6      | 0.6   | 0.3    | 0.3                  | 618 | 0.791             | 0.114     | 0.948    | 0.675     | 0.001                  | -0.001                 | -0.001                  | 0.001                  | -0.002                 | 100.0   |
| 0.3      | $R_{\perp\perp}$ | sharp   | 0.6      | 0.6   | 0.6    | 0.6                  | 416 | 0.790             | 0.097     | 0.946    | 0.315     | -0.002                 | 0.002                  | -0.002                  | -0.000                 | -0.001                 | 100.0   |
| 0.3      | $R_{\perp\perp}$ | sharp   | 0.6      | 0.6   | 0.6    | 0.6                  | 416 | 0.790             | 0.097     | 0.946    | 0.315     | -0.002                 | 0.002                  | -0.002                  | -0.000                 | -0.001                 | 100.0   |
| 0.3      | $R_+^{1\kappa}$  | cons.   | 0.2      | 0.4   | 0.0    | 0.0                  | 698 | 0.786             | 0.033*    | 0.950    | 0.967     | 0.000                  | 0.313                  | 0.002                   | -6.056                 | 2.602                  | 100.0   |
| 0.3      | $R_+^{1\kappa}$  | cons.   | 0.2      | 0.4   | 0.3    | 0.3                  | 635 | 0.780             | 0.004*    | 0.945    | 0.241     | 0.027                  | 0.306                  | 0.122                   | -0.095                 | -0.511                 | 100.0   |
| 0.3      | $R_+^{1\kappa}$  | cons.   | 0.2      | 0.4   | 0.6    | 0.6                  | 447 | 0.755             | 0.000*    | 0.948    | 0.557     | 0.109                  | 0.308                  | 0.222                   | -0.229                 | -0.515                 | 100.0   |
| 0.3      | $R_+^{1\kappa}$  | cons.   | 0.3      | 0.6   | 0.0    | 0.0                  | 698 | 0.799             | 0.453     | 0.948    | 0.615     | -0.001                 | 0.069                  | 0.001                   | 3.767                  | -1.353                 | 100.0   |
| 0.3      | $R_+^{1\kappa}$  | cons.   | 0.3      | 0.6   | 0.3    | 0.3                  | 635 | 0.785             | 0.024*    | 0.942    | 0.059     | 0.005                  | 0.061                  | 0.025                   | -0.024                 | -0.122                 | 100.0   |
| 0.3      | $R_+^{1\kappa}$  | cons.   | 0.3      | 0.6   | 0.6    | 0.6                  | 447 | 0.775             | 0.000*    | 0.943    | 0.071     | 0.021                  | 0.062                  | 0.044                   | -0.046                 | -0.132                 | 100.0   |
| 0.3      | $R_+^{1\kappa}$  | sharp   | 0.2      | 0.4   | 0.3    | 0.3                  | 618 | 0.766             | 0.000*    | 0.945    | 0.209     | 0.029                  | 0.309                  | 0.123                   | -0.086                 | -0.514                 | 100.0   |
| 0.3      | $R_+^{1\kappa}$  | sharp   | 0.2      | 0.4   | 0.6    | 0.6                  | 416 | 0.736             | 0.000*    | 0.948    | 0.615     | 0.109                  | 0.307                  | 0.222                   | -0.222                 | -0.512                 | 100.0   |
| 0.3      | $R_+^{1\kappa}$  | sharp   | 0.3      | 0.6   | 0.3    | 0.3                  | 618 | 0.776             | 0.001*    | 0.952    | 0.706     | 0.006                  | 0.064                  | 0.025                   | -0.014                 | -0.119                 | 100.0   |
| 0.3      | $R_+^{1\kappa}$  | sharp   | 0.3      | 0.6   | 0.6    | 0.6                  | 416 | 0.747             | 0.000*    | 0.940    | 0.012*    | 0.022                  | 0.061                  | 0.043                   | -0.045                 | -0.129                 | 100.0   |
| 0.3      | $R_-^{1\kappa}$  | cons.   | 0.2      | 0.4   | 0.0    | 0.0                  | 698 | 0.503             | 0.000*    | 0.912    | 0.000*    | -0.001                 | 0.069                  | 0.001                   | 2.392                  | -1.344                 | 100.0   |

Continued on next page

Additional simulation results for design I when working assumption A1(a) is violated: responders' end-of-study variance is 25% below the appropriate lower bound.

| $\delta$ | Response        | Formula | $r_{-1}$ | $r_1$ | $\rho$ | $\rho_{\text{size}}$ | $n$ | $1 - \hat{\beta}$ | $p$ value | Coverage | $p$ value | $\text{Cor}(R, Y_0^2)$ | $\text{Cor}(R, Y_1^2)$ | $\text{Cor}(R, Y_0Y_1)$ | $\text{Cov}(Y_0, Y_2)$ | $\text{Cov}(Y_1, Y_2)$ | % Valid |
|----------|-----------------|---------|----------|-------|--------|----------------------|-----|-------------------|-----------|----------|-----------|------------------------|------------------------|-------------------------|------------------------|------------------------|---------|
| 0.3      | $R_-^{1\kappa}$ | cons.   | 0.2      | 0.4   | 0.3    | 0.3                  | 635 | 0.475             | 0.000*    | 0.908    | 0.000*    | 0.005                  | 0.061                  | 0.025                   | -0.022                 | -0.123                 | 100.0   |
| 0.3      | $R_-^{1\kappa}$ | cons.   | 0.2      | 0.4   | 0.6    | 0.6                  | 447 | 0.445             | 0.000*    | 0.911    | 0.000*    | 0.021                  | 0.062                  | 0.044                   | -0.046                 | -0.132                 | 100.0   |
| 0.3      | $R_-^{1\kappa}$ | cons.   | 0.3      | 0.6   | 0.0    | 0.0                  | 698 | 0.617             | 0.000*    | 0.010    | 0.000*    | 0.000                  | 0.313                  | 0.002                   | -4.926                 | 2.140                  | 100.0   |
| 0.3      | $R_-^{1\kappa}$ | cons.   | 0.3      | 0.6   | 0.3    | 0.3                  | 635 | 0.562             | 0.000*    | 0.018    | 0.000*    | 0.027                  | 0.306                  | 0.122                   | -0.095                 | -0.511                 | 100.0   |
| 0.3      | $R_-^{1\kappa}$ | sharp   | 0.2      | 0.4   | 0.3    | 0.3                  | 618 | 0.470             | 0.000*    | 0.913    | 0.000*    | 0.006                  | 0.064                  | 0.025                   | -0.014                 | -0.120                 | 100.0   |
| 0.3      | $R_-^{1\kappa}$ | sharp   | 0.2      | 0.4   | 0.6    | 0.6                  | 416 | 0.400             | 0.000*    | 0.913    | 0.000*    | 0.022                  | 0.061                  | 0.043                   | -0.046                 | -0.130                 | 100.0   |
| 0.3      | $R_-^{1\kappa}$ | sharp   | 0.3      | 0.6   | 0.3    | 0.3                  | 618 | 0.574             | 0.000*    | 0.022    | 0.000*    | 0.029                  | 0.309                  | 0.123                   | -0.086                 | -0.513                 | 100.0   |
| 0.3      | $R_+^{2\kappa}$ | cons.   | 0.4      | 0.4   | 0.0    | 0.0                  | 698 | 0.788             | 0.058     | 0.939    | 0.006*    | 0.000                  | 0.145                  | 0.001                   | 0.674                  | 1.676                  | 100.0   |
| 0.3      | $R_+^{2\kappa}$ | cons.   | 0.4      | 0.4   | 0.3    | 0.3                  | 635 | 0.772             | 0.000*    | 0.954    | 0.379     | 0.013                  | 0.144                  | 0.058                   | -0.039                 | -0.274                 | 100.0   |
| 0.3      | $R_+^{2\kappa}$ | cons.   | 0.4      | 0.4   | 0.6    | 0.6                  | 447 | 0.743             | 0.000*    | 0.949    | 0.801     | 0.050                  | 0.144                  | 0.104                   | -0.103                 | -0.265                 | 100.0   |
| 0.3      | $R_+^{2\kappa}$ | cons.   | 0.4      | 0.6   | 0.0    | 0.0                  | 698 | 0.794             | 0.199     | 0.941    | 0.033*    | -0.001                 | 0.006                  | 0.001                   | 2.369                  | -1.248                 | 100.0   |
| 0.3      | $R_+^{2\kappa}$ | cons.   | 0.4      | 0.6   | 0.3    | 0.3                  | 635 | 0.779             | 0.003*    | 0.950    | 0.933     | -0.001                 | 0.001                  | -0.002                  | -0.001                 | 0.000                  | 100.0   |
| 0.3      | $R_+^{2\kappa}$ | cons.   | 0.4      | 0.6   | 0.6    | 0.6                  | 447 | 0.758             | 0.000*    | 0.940    | 0.013*    | -0.002                 | 0.000                  | -0.001                  | -0.004                 | 0.001                  | 100.0   |
| 0.3      | $R_+^{2\kappa}$ | cons.   | 0.6      | 0.4   | 0.0    | 0.0                  | 698 | 0.791             | 0.105     | 0.935    | 0.000*    | 0.000                  | 0.008                  | 0.001                   | 0.016                  | -1.176                 | 100.0   |
| 0.3      | $R_+^{2\kappa}$ | cons.   | 0.6      | 0.4   | 0.3    | 0.3                  | 635 | 0.780             | 0.004*    | 0.945    | 0.209     | -0.000                 | 0.002                  | -0.001                  | -0.002                 | 0.006                  | 100.0   |
| 0.3      | $R_+^{2\kappa}$ | cons.   | 0.6      | 0.4   | 0.6    | 0.6                  | 447 | 0.738             | 0.000*    | 0.947    | 0.402     | -0.001                 | -0.003                 | -0.003                  | -0.001                 | -0.006                 | 100.0   |
| 0.3      | $R_+^{2\kappa}$ | cons.   | 0.6      | 0.6   | 0.0    | 0.0                  | 698 | 0.789             | 0.076     | 0.947    | 0.451     | -0.001                 | -0.143                 | 0.001                   | 1.093                  | -0.155                 | 100.0   |
| 0.3      | $R_+^{2\kappa}$ | cons.   | 0.6      | 0.6   | 0.3    | 0.3                  | 635 | 0.799             | 0.435     | 0.951    | 0.834     | -0.013                 | -0.143                 | -0.059                  | 0.040                  | 0.360                  | 100.0   |
| 0.3      | $R_+^{2\kappa}$ | cons.   | 0.6      | 0.6   | 0.6    | 0.6                  | 447 | 0.753             | 0.000*    | 0.937    | 0.002*    | -0.052                 | -0.145                 | -0.105                  | 0.108                  | 0.348                  | 100.0   |
| 0.3      | $R_+^{2\kappa}$ | sharp   | 0.4      | 0.4   | 0.3    | 0.3                  | 618 | 0.758             | 0.000*    | 0.949    | 0.737     | 0.013                  | 0.143                  | 0.057                   | -0.037                 | -0.256                 | 100.0   |
| 0.3      | $R_+^{2\kappa}$ | sharp   | 0.4      | 0.4   | 0.6    | 0.6                  | 416 | 0.716             | 0.000*    | 0.951    | 0.834     | 0.052                  | 0.144                  | 0.104                   | -0.102                 | -0.265                 | 100.0   |
| 0.3      | $R_+^{2\kappa}$ | sharp   | 0.4      | 0.6   | 0.3    | 0.3                  | 618 | 0.783             | 0.010*    | 0.950    | 1.000     | -0.001                 | -0.004                 | -0.003                  | -0.006                 | -0.011                 | 100.0   |
| 0.3      | $R_+^{2\kappa}$ | sharp   | 0.4      | 0.6   | 0.6    | 0.6                  | 416 | 0.745             | 0.000*    | 0.943    | 0.071     | 0.000                  | 0.001                  | -0.001                  | 0.004                  | -0.004                 | 100.0   |
| 0.3      | $R_+^{2\kappa}$ | sharp   | 0.6      | 0.4   | 0.3    | 0.3                  | 618 | 0.766             | 0.000*    | 0.955    | 0.258     | 0.001                  | -0.003                 | -0.001                  | 0.002                  | -0.006                 | 100.0   |
| 0.3      | $R_+^{2\kappa}$ | sharp   | 0.6      | 0.4   | 0.6    | 0.6                  | 416 | 0.727             | 0.000*    | 0.949    | 0.867     | -0.002                 | -0.001                 | -0.002                  | -0.003                 | -0.004                 | 100.0   |
| 0.3      | $R_+^{2\kappa}$ | sharp   | 0.6      | 0.6   | 0.3    | 0.3                  | 618 | 0.790             | 0.097     | 0.950    | 1.000     | -0.013                 | -0.144                 | -0.060                  | 0.039                  | 0.339                  | 100.0   |
| 0.3      | $R_+^{2\kappa}$ | sharp   | 0.6      | 0.6   | 0.6    | 0.6                  | 416 | 0.730             | 0.000*    | 0.947    | 0.503     | -0.053                 | -0.143                 | -0.105                  | 0.110                  | 0.346                  | 100.0   |
| 0.3      | $R_-^{2\kappa}$ | cons.   | 0.4      | 0.4   | 0.0    | 0.0                  | 698 | 0.993             | 1.000     | 0.733    | 0.000*    | -0.001                 | -0.143                 | 0.001                   | 1.438                  | -0.298                 | 100.0   |
| 0.3      | $R_-^{2\kappa}$ | cons.   | 0.4      | 0.4   | 0.3    | 0.3                  | 635 | 0.992             | 1.000     | 0.716    | 0.000*    | -0.013                 | -0.143                 | -0.059                  | 0.040                  | 0.359                  | 100.0   |
| 0.3      | $R_-^{2\kappa}$ | cons.   | 0.4      | 0.4   | 0.6    | 0.6                  | 447 | 0.981             | 1.000     | 0.727    | 0.000*    | -0.052                 | -0.145                 | -0.105                  | 0.108                  | 0.347                  | 100.0   |
| 0.3      | $R_-^{2\kappa}$ | cons.   | 0.4      | 0.6   | 0.0    | 0.0                  | 698 | 0.727             | 0.000*    | 0.937    | 0.002*    | 0.000                  | 0.008                  | 0.001                   | -0.261                 | -1.203                 | 100.0   |
| 0.3      | $R_-^{2\kappa}$ | cons.   | 0.4      | 0.6   | 0.3    | 0.3                  | 635 | 0.729             | 0.000*    | 0.944    | 0.132     | -0.000                 | 0.002                  | -0.001                  | -0.000                 | 0.008                  | 100.0   |
| 0.3      | $R_-^{2\kappa}$ | cons.   | 0.4      | 0.6   | 0.6    | 0.6                  | 447 | 0.693             | 0.000*    | 0.937    | 0.002*    | -0.001                 | -0.003                 | -0.003                  | -0.001                 | -0.007                 | 100.0   |
| 0.3      | $R_-^{2\kappa}$ | cons.   | 0.4      | 0.6   | 0.8    | 0.8                  | 252 | 0.618             | 0.000*    | 0.946    | 0.357     | 0.001                  | 0.002                  | 0.002                   | -0.002                 | 0.001                  | 100.0   |
| 0.3      | $R_-^{2\kappa}$ | cons.   | 0.6      | 0.4   | 0.0    | 0.0                  | 698 | 0.832             | 1.000     | 0.937    | 0.002*    | -0.001                 | 0.006                  | 0.001                   | 2.248                  | -1.254                 | 100.0   |
| 0.3      | $R_-^{2\kappa}$ | cons.   | 0.6      | 0.4   | 0.3    | 0.3                  | 635 | 0.805             | 0.745     | 0.944    | 0.111     | -0.001                 | 0.001                  | -0.002                  | -0.001                 | -0.000                 | 100.0   |
| 0.3      | $R_-^{2\kappa}$ | cons.   | 0.6      | 0.4   | 0.6    | 0.6                  | 447 | 0.757             | 0.000*    | 0.935    | 0.000*    | -0.002                 | 0.000                  | -0.001                  | -0.003                 | 0.001                  | 100.0   |
| 0.3      | $R_-^{2\kappa}$ | cons.   | 0.6      | 0.6   | 0.0    | 0.0                  | 698 | 0.286             | 0.000*    | 0.777    | 0.000*    | 0.000                  | 0.145                  | 0.001                   | 0.717                  | 1.591                  | 100.0   |
| 0.3      | $R_-^{2\kappa}$ | cons.   | 0.6      | 0.6   | 0.3    | 0.3                  | 635 | 0.268             | 0.000*    | 0.785    | 0.000*    | 0.013                  | 0.144                  | 0.058                   | -0.039                 | -0.275                 | 100.0   |
| 0.3      | $R_-^{2\kappa}$ | cons.   | 0.6      | 0.6   | 0.6    | 0.6                  | 447 | 0.252             | 0.000*    | 0.807    | 0.000*    | 0.050                  | 0.144                  | 0.104                   | -0.102                 | -0.265                 | 100.0   |
| 0.3      | $R_-^{2\kappa}$ | sharp   | 0.4      | 0.4   | 0.3    | 0.3                  | 618 | 0.988             | 1.000     | 0.734    | 0.000*    | -0.013                 | -0.144                 | -0.060                  | 0.039                  | 0.340                  | 100.0   |
| 0.3      | $R_-^{2\kappa}$ | sharp   | 0.4      | 0.4   | 0.6    | 0.6                  | 416 | 0.979             | 1.000     | 0.740    | 0.000*    | -0.053                 | -0.143                 | -0.105                  | 0.109                  | 0.346                  | 100.0   |
| 0.3      | $R_-^{2\kappa}$ | sharp   | 0.4      | 0.6   | 0.3    | 0.3                  | 618 | 0.707             | 0.000*    | 0.953    | 0.476     | 0.001                  | -0.003                 | -0.001                  | 0.002                  | -0.006                 | 100.0   |
| 0.3      | $R_-^{2\kappa}$ | sharp   | 0.4      | 0.6   | 0.6    | 0.6                  | 416 | 0.674             | 0.000*    | 0.949    | 0.737     | -0.002                 | -0.001                 | -0.002                  | -0.002                 | -0.004                 | 100.0   |
| 0.3      | $R_-^{2\kappa}$ | sharp   | 0.4      | 0.6   | 0.8    | 0.8                  | 227 | 0.578             | 0.000*    | 0.939    | 0.006*    | -0.005                 | 0.008                  | 0.007                   | 0.004                  | 0.005                  | 100.0   |

Continued on next page

Additional simulation results for design I when working assumption A1(a) is violated: responders' end-of-study variance is 25% below the appropriate lower bound.

| $\delta$ | Response        | Formula | $r_{-1}$ | $r_1$ | $\rho$ | $\rho_{\text{size}}$ | $n$ | $1 - \hat{\beta}$ | $p$ value | Coverage | $p$ value | $\text{Cor}(R, Y_0^2)$ | $\text{Cor}(R, Y_1^2)$ | $\text{Cor}(R, Y_0Y_1)$ | $\text{Cov}(Y_0, Y_2)$ | $\text{Cov}(Y_1, Y_2)$ | % Valid |
|----------|-----------------|---------|----------|-------|--------|----------------------|-----|-------------------|-----------|----------|-----------|------------------------|------------------------|-------------------------|------------------------|------------------------|---------|
| 0.3      | $R_-^{2\kappa}$ | sharp   | 0.6      | 0.4   | 0.3    | 0.3                  | 618 | 0.800             | 0.507     | 0.947    | 0.451     | -0.001                 | -0.004                 | -0.003                  | -0.005                 | -0.011                 | 100.0   |
| 0.3      | $R_-^{2\kappa}$ | sharp   | 0.6      | 0.4   | 0.6    | 0.6                  | 416 | 0.741             | 0.000*    | 0.939    | 0.009*    | 0.000                  | 0.001                  | -0.001                  | 0.004                  | -0.004                 | 100.0   |
| 0.3      | $R_-^{2\kappa}$ | sharp   | 0.6      | 0.6   | 0.3    | 0.3                  | 618 | 0.265             | 0.000*    | 0.784    | 0.000*    | 0.013                  | 0.143                  | 0.057                   | -0.037                 | -0.256                 | 100.0   |
| 0.3      | $R_-^{2\kappa}$ | sharp   | 0.6      | 0.6   | 0.6    | 0.6                  | 416 | 0.241             | 0.000*    | 0.817    | 0.000*    | 0.052                  | 0.144                  | 0.104                   | -0.103                 | -0.265                 | 100.0   |
| 0.5      | $R_+$           | cons.   | 0.4      | 0.4   | 0.0    | 0.0                  | 252 | 0.798             | 0.417     | 0.938    | 0.004*    | -0.001                 | 0.079                  | -0.003                  | 10.442                 | 0.109                  | 100.0   |
| 0.5      | $R_+$           | cons.   | 0.4      | 0.4   | 0.3    | 0.3                  | 229 | 0.814             | 0.977     | 0.939    | 0.007*    | 0.007                  | 0.079                  | 0.032                   | -0.018                 | -0.101                 | 100.0   |
| 0.5      | $R_+$           | cons.   | 0.4      | 0.4   | 0.6    | 0.6                  | 161 | 0.868             | 1.000     | 0.935    | 0.000*    | 0.031                  | 0.081                  | 0.061                   | -0.052                 | -0.101                 | 100.0   |
| 0.5      | $R_+$           | cons.   | 0.4      | 0.4   | 0.8    | 0.8                  | 91  | 0.926             | 1.000     | 0.935    | 0.000*    | 0.054                  | 0.081                  | 0.072                   | -0.087                 | -0.109                 | 100.0   |
| 0.5      | $R_+$           | cons.   | 0.4      | 0.6   | 0.0    | 0.0                  | 252 | 0.802             | 0.597     | 0.940    | 0.012*    | -0.002                 | 0.011                  | -0.002                  | 6.769                  | 0.562                  | 100.0   |
| 0.5      | $R_+$           | cons.   | 0.4      | 0.6   | 0.3    | 0.3                  | 229 | 0.816             | 0.987     | 0.943    | 0.071     | -0.002                 | 0.011                  | 0.003                   | -0.012                 | -0.023                 | 100.0   |
| 0.5      | $R_+$           | cons.   | 0.4      | 0.6   | 0.6    | 0.6                  | 161 | 0.850             | 1.000     | 0.945    | 0.180     | 0.008                  | 0.012                  | 0.012                   | -0.006                 | -0.005                 | 100.0   |
| 0.5      | $R_+$           | cons.   | 0.4      | 0.6   | 0.8    | 0.8                  | 91  | 0.894             | 1.000     | 0.935    | 0.000*    | 0.010                  | 0.011                  | 0.012                   | -0.014                 | -0.013                 | 100.0   |
| 0.5      | $R_+$           | cons.   | 0.6      | 0.4   | 0.0    | 0.0                  | 252 | 0.797             | 0.331     | 0.949    | 0.737     | -0.003                 | 0.010                  | -0.002                  | 1.000                  | 1.235                  | 100.0   |
| 0.5      | $R_+$           | cons.   | 0.6      | 0.4   | 0.3    | 0.3                  | 229 | 0.828             | 1.000     | 0.943    | 0.071     | 0.002                  | 0.009                  | 0.003                   | 0.012                  | -0.010                 | 100.0   |
| 0.5      | $R_+$           | cons.   | 0.6      | 0.4   | 0.6    | 0.6                  | 161 | 0.874             | 1.000     | 0.943    | 0.094     | 0.005                  | 0.010                  | 0.009                   | 0.001                  | 0.003                  | 100.0   |
| 0.5      | $R_+$           | cons.   | 0.6      | 0.4   | 0.8    | 0.8                  | 91  | 0.923             | 1.000     | 0.933    | 0.000*    | 0.009                  | 0.015                  | 0.014                   | -0.019                 | -0.017                 | 100.0   |
| 0.5      | $R_+$           | cons.   | 0.6      | 0.6   | 0.0    | 0.0                  | 252 | 0.792             | 0.152     | 0.942    | 0.049*    | -0.004                 | -0.060                 | -0.002                  | -0.691                 | -1.242                 | 100.0   |
| 0.5      | $R_+$           | cons.   | 0.6      | 0.6   | 0.3    | 0.3                  | 229 | 0.811             | 0.943     | 0.950    | 0.933     | -0.009                 | -0.061                 | -0.026                  | -0.002                 | 0.047                  | 100.0   |
| 0.5      | $R_+$           | cons.   | 0.6      | 0.6   | 0.6    | 0.6                  | 161 | 0.861             | 1.000     | 0.941    | 0.026*    | -0.021                 | -0.060                 | -0.041                  | 0.045                  | 0.087                  | 100.0   |
| 0.5      | $R_+$           | cons.   | 0.6      | 0.6   | 0.8    | 0.8                  | 91  | 0.896             | 1.000     | 0.940    | 0.013*    | -0.038                 | -0.060                 | -0.052                  | 0.056                  | 0.078                  | 100.0   |
| 0.5      | $R_+$           | sharp   | 0.4      | 0.4   | 0.3    | 0.3                  | 223 | 0.816             | 0.987     | 0.953    | 0.426     | 0.007                  | 0.077                  | 0.032                   | -0.029                 | -0.104                 | 100.0   |
| 0.5      | $R_+$           | sharp   | 0.4      | 0.4   | 0.6    | 0.6                  | 150 | 0.841             | 1.000     | 0.945    | 0.180     | 0.030                  | 0.082                  | 0.060                   | -0.053                 | -0.102                 | 100.0   |
| 0.5      | $R_+$           | sharp   | 0.4      | 0.4   | 0.8    | 0.8                  | 82  | 0.896             | 1.000     | 0.947    | 0.476     | 0.052                  | 0.082                  | 0.073                   | -0.091                 | -0.114                 | 99.9    |
| 0.5      | $R_+$           | sharp   | 0.4      | 0.6   | 0.3    | 0.3                  | 223 | 0.813             | 0.965     | 0.942    | 0.049*    | 0.002                  | 0.009                  | 0.004                   | 0.007                  | -0.013                 | 100.0   |
| 0.5      | $R_+$           | sharp   | 0.4      | 0.6   | 0.6    | 0.6                  | 150 | 0.836             | 1.000     | 0.944    | 0.111     | 0.006                  | 0.015                  | 0.012                   | -0.003                 | -0.006                 | 100.0   |
| 0.5      | $R_+$           | sharp   | 0.4      | 0.6   | 0.8    | 0.8                  | 82  | 0.865             | 1.000     | 0.937    | 0.002*    | 0.008                  | 0.013                  | 0.010                   | -0.017                 | -0.010                 | 99.9    |
| 0.5      | $R_+$           | sharp   | 0.6      | 0.4   | 0.3    | 0.3                  | 223 | 0.815             | 0.980     | 0.942    | 0.059     | 0.004                  | 0.008                  | 0.004                   | -0.000                 | -0.024                 | 100.0   |
| 0.5      | $R_+$           | sharp   | 0.6      | 0.4   | 0.6    | 0.6                  | 150 | 0.839             | 1.000     | 0.936    | 0.000*    | 0.003                  | 0.009                  | 0.007                   | -0.004                 | -0.008                 | 100.0   |
| 0.5      | $R_+$           | sharp   | 0.6      | 0.4   | 0.8    | 0.8                  | 82  | 0.888             | 1.000     | 0.937    | 0.002*    | 0.007                  | 0.013                  | 0.010                   | -0.014                 | -0.013                 | 100.0   |
| 0.5      | $R_+$           | sharp   | 0.6      | 0.6   | 0.3    | 0.3                  | 223 | 0.805             | 0.760     | 0.940    | 0.017*    | -0.004                 | -0.061                 | -0.024                  | 0.031                  | 0.086                  | 100.0   |
| 0.5      | $R_+$           | sharp   | 0.6      | 0.6   | 0.6    | 0.6                  | 150 | 0.834             | 1.000     | 0.947    | 0.451     | -0.023                 | -0.064                 | -0.045                  | 0.041                  | 0.078                  | 100.0   |
| 0.5      | $R_+$           | sharp   | 0.6      | 0.6   | 0.8    | 0.8                  | 82  | 0.870             | 1.000     | 0.938    | 0.004*    | -0.037                 | -0.062                 | -0.053                  | 0.064                  | 0.087                  | 100.0   |
| 0.5      | $R_-$           | cons.   | 0.4      | 0.4   | 0.0    | 0.0                  | 252 | 0.799             | 0.435     | 0.953    | 0.530     | 0.004                  | 0.079                  | 0.001                   | 3.910                  | 0.248                  | 100.0   |
| 0.5      | $R_-$           | cons.   | 0.4      | 0.4   | 0.3    | 0.3                  | 229 | 0.791             | 0.105     | 0.946    | 0.357     | 0.009                  | 0.079                  | 0.033                   | -0.024                 | -0.098                 | 100.0   |
| 0.5      | $R_-$           | cons.   | 0.4      | 0.4   | 0.6    | 0.6                  | 161 | 0.781             | 0.006*    | 0.937    | 0.002*    | 0.026                  | 0.078                  | 0.054                   | -0.058                 | -0.113                 | 100.0   |
| 0.5      | $R_-$           | cons.   | 0.4      | 0.4   | 0.8    | 0.8                  | 91  | 0.730             | 0.000*    | 0.935    | 0.000*    | 0.051                  | 0.080                  | 0.070                   | -0.066                 | -0.098                 | 100.0   |
| 0.5      | $R_-$           | cons.   | 0.4      | 0.6   | 0.0    | 0.0                  | 252 | 0.794             | 0.225     | 0.945    | 0.241     | 0.004                  | 0.009                  | 0.001                   | 2.011                  | 2.250                  | 100.0   |
| 0.5      | $R_-$           | cons.   | 0.4      | 0.6   | 0.3    | 0.3                  | 229 | 0.791             | 0.114     | 0.938    | 0.003*    | 0.001                  | 0.010                  | 0.006                   | -0.011                 | -0.001                 | 100.0   |
| 0.5      | $R_-$           | cons.   | 0.4      | 0.6   | 0.6    | 0.6                  | 161 | 0.799             | 0.435     | 0.943    | 0.086     | 0.002                  | 0.011                  | 0.007                   | -0.014                 | -0.017                 | 100.0   |
| 0.5      | $R_-$           | cons.   | 0.4      | 0.6   | 0.8    | 0.8                  | 91  | 0.771             | 0.000*    | 0.938    | 0.004*    | 0.005                  | 0.011                  | 0.007                   | 0.002                  | -0.002                 | 99.9    |
| 0.5      | $R_-$           | cons.   | 0.6      | 0.4   | 0.0    | 0.0                  | 252 | 0.794             | 0.199     | 0.939    | 0.006*    | 0.002                  | 0.010                  | 0.001                   | 0.155                  | 1.211                  | 100.0   |
| 0.5      | $R_-$           | cons.   | 0.6      | 0.4   | 0.3    | 0.3                  | 229 | 0.789             | 0.070     | 0.935    | 0.000*    | 0.001                  | 0.011                  | 0.006                   | -0.002                 | -0.012                 | 100.0   |
| 0.5      | $R_-$           | cons.   | 0.6      | 0.4   | 0.6    | 0.6                  | 161 | 0.788             | 0.053     | 0.947    | 0.451     | 0.003                  | 0.012                  | 0.007                   | -0.013                 | -0.014                 | 100.0   |
| 0.5      | $R_-$           | cons.   | 0.6      | 0.4   | 0.8    | 0.8                  | 91  | 0.757             | 0.000*    | 0.941    | 0.026*    | 0.011                  | 0.012                  | 0.012                   | 0.010                  | 0.000                  | 100.0   |
| 0.5      | $R_-$           | cons.   | 0.6      | 0.6   | 0.0    | 0.0                  | 252 | 0.810             | 0.925     | 0.946    | 0.357     | 0.001                  | -0.062                 | 0.002                   | 1.356                  | -0.222                 | 100.0   |

Continued on next page

Additional simulation results for design I when working assumption A1(a) is violated: responders' end-of-study variance is 25% below the appropriate lower bound.

| $\delta$ | Response | Formula | $r_{-1}$ | $r_1$ | $\rho$ | $\rho_{\text{size}}$ | $n$ | $1 - \hat{\beta}$ | $p$ value | Coverage | $p$ value | $\text{Cor}(R, Y_0^2)$ | $\text{Cor}(R, Y_1^2)$ | $\text{Cor}(R, Y_0Y_1)$ | $\text{Cov}(Y_0, Y_2)$ | $\text{Cov}(Y_1, Y_2)$ | % Valid |
|----------|----------|---------|----------|-------|--------|----------------------|-----|-------------------|-----------|----------|-----------|------------------------|------------------------|-------------------------|------------------------|------------------------|---------|
| 0.5      | $R_-$    | cons.   | 0.6      | 0.6   | 0.3    | 0.3                  | 229 | 0.809             | 0.904     | 0.946    | 0.276     | -0.006                 | -0.060                 | -0.025                  | 0.022                  | 0.079                  | 100.0   |
| 0.5      | $R_-$    | cons.   | 0.6      | 0.6   | 0.6    | 0.6                  | 161 | 0.795             | 0.239     | 0.943    | 0.094     | -0.025                 | -0.063                 | -0.049                  | 0.038                  | 0.076                  | 100.0   |
| 0.5      | $R_-$    | cons.   | 0.6      | 0.6   | 0.8    | 0.8                  | 91  | 0.765             | 0.000*    | 0.937    | 0.001*    | -0.042                 | -0.060                 | -0.055                  | 0.085                  | 0.100                  | 99.9    |
| 0.5      | $R_-$    | sharp   | 0.4      | 0.4   | 0.3    | 0.3                  | 223 | 0.778             | 0.002*    | 0.944    | 0.132     | 0.007                  | 0.080                  | 0.032                   | -0.027                 | -0.103                 | 100.0   |
| 0.5      | $R_-$    | sharp   | 0.4      | 0.4   | 0.6    | 0.6                  | 150 | 0.763             | 0.000*    | 0.941    | 0.033*    | 0.028                  | 0.081                  | 0.058                   | -0.053                 | -0.109                 | 100.0   |
| 0.5      | $R_-$    | sharp   | 0.4      | 0.4   | 0.8    | 0.8                  | 82  | 0.703             | 0.000*    | 0.930    | 0.000*    | 0.051                  | 0.081                  | 0.070                   | -0.073                 | -0.108                 | 99.9    |
| 0.5      | $R_-$    | sharp   | 0.4      | 0.6   | 0.3    | 0.3                  | 223 | 0.792             | 0.142     | 0.946    | 0.315     | 0.002                  | 0.011                  | 0.005                   | 0.009                  | -0.012                 | 100.0   |
| 0.5      | $R_-$    | sharp   | 0.4      | 0.6   | 0.6    | 0.6                  | 150 | 0.769             | 0.000*    | 0.939    | 0.009*    | 0.003                  | 0.012                  | 0.008                   | -0.002                 | -0.007                 | 100.0   |
| 0.5      | $R_-$    | sharp   | 0.4      | 0.6   | 0.8    | 0.8                  | 82  | 0.732             | 0.000*    | 0.942    | 0.040*    | 0.006                  | 0.010                  | 0.009                   | 0.006                  | -0.005                 | 99.9    |
| 0.5      | $R_-$    | sharp   | 0.6      | 0.4   | 0.3    | 0.3                  | 223 | 0.774             | 0.000*    | 0.947    | 0.451     | 0.001                  | 0.013                  | 0.004                   | -0.014                 | -0.028                 | 100.0   |
| 0.5      | $R_-$    | sharp   | 0.6      | 0.4   | 0.6    | 0.6                  | 150 | 0.758             | 0.000*    | 0.939    | 0.007*    | 0.004                  | 0.014                  | 0.008                   | -0.016                 | -0.016                 | 100.0   |
| 0.5      | $R_-$    | sharp   | 0.6      | 0.4   | 0.8    | 0.8                  | 82  | 0.716             | 0.000*    | 0.930    | 0.000*    | 0.009                  | 0.010                  | 0.010                   | 0.006                  | -0.006                 | 100.0   |
| 0.5      | $R_-$    | sharp   | 0.6      | 0.6   | 0.3    | 0.3                  | 223 | 0.799             | 0.471     | 0.949    | 0.867     | -0.005                 | -0.058                 | -0.024                  | 0.016                  | 0.083                  | 100.0   |
| 0.5      | $R_-$    | sharp   | 0.6      | 0.6   | 0.6    | 0.6                  | 150 | 0.762             | 0.000*    | 0.942    | 0.040*    | -0.024                 | -0.063                 | -0.046                  | 0.038                  | 0.084                  | 100.0   |
| 0.5      | $R_-$    | sharp   | 0.6      | 0.6   | 0.8    | 0.8                  | 82  | 0.721             | 0.000*    | 0.930    | 0.000*    | -0.041                 | -0.063                 | -0.056                  | 0.073                  | 0.089                  | 99.9    |

**Table S6:** Additional simulation results for design I when working assumption A1(b) is violated: response is highly correlated with  $(Y_1^{(d)} - \mu_1^{(d)})^2$

| $\delta$ | Response | Formula | $r_{-1}$ | $r_1$ | $\rho$ | $\rho_{size}$ | $n$ | $1 - \hat{\beta}$ | $p$ value | Coverage | $p$ value | $Cor(R, Y_0^2)$ | $Cor(R, Y_1^2)$ | $Cor(R, Y_0Y_1)$ | $Cov(Y_0, Y_2)$ | $Cov(Y_1, Y_2)$ | % Valid |
|----------|----------|---------|----------|-------|--------|---------------|-----|-------------------|-----------|----------|-----------|-----------------|-----------------|------------------|-----------------|-----------------|---------|
| 0.3      | $R_+^2$  | cons.   | 0.4      | 0.4   | 0.0    | 0.0           | 698 | 0.796             | 0.299     | 0.944    | 0.111     | -0.000          | 0.687           | 0.001            | 2.542           | -1.575          | 100.0   |
| 0.3      | $R_+^2$  | cons.   | 0.4      | 0.4   | 0.3    | 0.3           | 635 | 0.804             | 0.715     | 0.948    | 0.615     | 0.061           | 0.686           | 0.276            | 0.775           | 9.173           | 100.0   |
| 0.3      | $R_+^2$  | cons.   | 0.4      | 0.4   | 0.6    | 0.6           | 447 | 0.817             | 0.990     | 0.946    | 0.315     | 0.245           | 0.690           | 0.499            | 2.224           | 9.146           | 100.0   |
| 0.3      | $R_+^2$  | cons.   | 0.4      | 0.6   | 0.0    | 0.0           | 698 | 0.798             | 0.399     | 0.945    | 0.209     | 0.000           | 0.612           | 0.001            | -1.282          | 1.678           | 100.0   |
| 0.3      | $R_+^2$  | cons.   | 0.4      | 0.6   | 0.3    | 0.3           | 635 | 0.811             | 0.932     | 0.951    | 0.769     | 0.054           | 0.609           | 0.245            | 0.705           | 11.667          | 100.0   |
| 0.3      | $R_+^2$  | cons.   | 0.4      | 0.6   | 0.6    | 0.6           | 447 | 0.823             | 0.999     | 0.946    | 0.357     | 0.218           | 0.613           | 0.443            | 2.150           | 11.578          | 100.0   |
| 0.3      | $R_+^2$  | cons.   | 0.6      | 0.4   | 0.0    | 0.0           | 698 | 0.792             | 0.152     | 0.946    | 0.357     | -0.001          | 0.613           | 0.001            | -2.017          | 40.017          | 100.0   |
| 0.3      | $R_+^2$  | cons.   | 0.6      | 0.4   | 0.3    | 0.3           | 635 | 0.792             | 0.142     | 0.952    | 0.706     | 0.055           | 0.609           | 0.245            | 0.699           | 11.569          | 100.0   |
| 0.3      | $R_+^2$  | cons.   | 0.6      | 0.4   | 0.6    | 0.6           | 447 | 0.828             | 1.000     | 0.938    | 0.004*    | 0.218           | 0.611           | 0.443            | 2.130           | 11.502          | 100.0   |
| 0.3      | $R_+^2$  | cons.   | 0.6      | 0.6   | 0.0    | 0.0           | 698 | 0.791             | 0.105     | 0.942    | 0.040*    | -0.001          | 0.532           | 0.001            | -0.927          | -0.459          | 100.0   |
| 0.3      | $R_+^2$  | cons.   | 0.6      | 0.6   | 0.3    | 0.3           | 635 | 0.805             | 0.745     | 0.949    | 0.801     | 0.048           | 0.531           | 0.214            | 0.644           | 17.538          | 100.0   |
| 0.3      | $R_+^2$  | cons.   | 0.6      | 0.6   | 0.6    | 0.6           | 447 | 0.831             | 1.000     | 0.942    | 0.049*    | 0.191           | 0.534           | 0.386            | 2.016           | 17.045          | 100.0   |
| 0.3      | $R_+^2$  | sharp   | 0.4      | 0.4   | 0.3    | 0.3           | 618 | 0.786             | 0.030*    | 0.941    | 0.026*    | 0.061           | 0.688           | 0.277            | 0.770           | 9.035           | 100.0   |
| 0.3      | $R_+^2$  | sharp   | 0.4      | 0.4   | 0.6    | 0.6           | 416 | 0.800             | 0.489     | 0.943    | 0.086     | 0.248           | 0.690           | 0.499            | 2.225           | 9.141           | 100.0   |
| 0.3      | $R_+^2$  | sharp   | 0.4      | 0.6   | 0.3    | 0.3           | 618 | 0.794             | 0.225     | 0.950    | 0.933     | 0.054           | 0.612           | 0.246            | 0.700           | 11.497          | 100.0   |
| 0.3      | $R_+^2$  | sharp   | 0.4      | 0.6   | 0.6    | 0.6           | 416 | 0.814             | 0.972     | 0.945    | 0.180     | 0.220           | 0.612           | 0.443            | 2.135           | 11.494          | 100.0   |
| 0.3      | $R_+^2$  | sharp   | 0.6      | 0.4   | 0.3    | 0.3           | 618 | 0.790             | 0.083     | 0.948    | 0.615     | 0.054           | 0.610           | 0.246            | 0.706           | 11.568          | 100.0   |
| 0.3      | $R_+^2$  | sharp   | 0.6      | 0.4   | 0.6    | 0.6           | 416 | 0.802             | 0.615     | 0.954    | 0.295     | 0.220           | 0.613           | 0.443            | 2.144           | 11.510          | 100.0   |
| 0.3      | $R_+^2$  | sharp   | 0.6      | 0.6   | 0.3    | 0.3           | 618 | 0.815             | 0.980     | 0.952    | 0.706     | 0.047           | 0.533           | 0.215            | 0.628           | 17.519          | 100.0   |
| 0.3      | $R_+^2$  | sharp   | 0.6      | 0.6   | 0.6    | 0.6           | 416 | 0.800             | 0.507     | 0.944    | 0.154     | 0.192           | 0.534           | 0.387            | 2.032           | 17.123          | 100.0   |
| 0.3      | $R_+^2$  | cons.   | 0.4      | 0.4   | 0.0    | 0.0           | 698 | 1.000             | 1.000     | 0.278    | 0.000*    | 0.000           | -0.422          | -0.002           | 1.455           | 4.183           | 100.0   |
| 0.3      | $R_-^2$  | cons.   | 0.4      | 0.4   | 0.3    | 0.3           | 635 | 1.000             | 1.000     | 0.331    | 0.000*    | -0.038          | -0.421          | -0.169           | 0.142           | 1.648           | 100.0   |
| 0.3      | $R_-^2$  | cons.   | 0.4      | 0.6   | 0.0    | 0.0           | 698 | 0.977             | 1.000     | 0.781    | 0.000*    | 0.000           | -0.355          | -0.001           | -1.562          | 2.041           | 100.0   |
| 0.3      | $R_-^2$  | cons.   | 0.4      | 0.6   | 0.3    | 0.3           | 635 | 0.967             | 1.000     | 0.793    | 0.000*    | -0.032          | -0.353          | -0.141           | 0.106           | 1.241           | 100.0   |
| 0.3      | $R_-^2$  | cons.   | 0.6      | 0.4   | 0.0    | 0.0           | 698 | 0.998             | 1.000     | 0.497    | 0.000*    | 0.001           | -0.357          | -0.001           | 1.714           | 0.783           | 100.0   |
| 0.3      | $R_-^2$  | cons.   | 0.6      | 0.4   | 0.3    | 0.3           | 635 | 0.996             | 1.000     | 0.496    | 0.000*    | -0.032          | -0.353          | -0.142           | 0.106           | 1.221           | 100.0   |
| 0.3      | $R_-^2$  | cons.   | 0.6      | 0.6   | 0.0    | 0.0           | 698 | 0.932             | 1.000     | 0.897    | 0.000*    | 0.001           | -0.286          | -0.001           | -0.089          | -1.619          | 100.0   |
| 0.3      | $R_-^2$  | cons.   | 0.6      | 0.6   | 0.3    | 0.3           | 635 | 0.944             | 1.000     | 0.906    | 0.000*    | -0.026          | -0.285          | -0.115           | 0.086           | 0.857           | 100.0   |
| 0.3      | $R_-^2$  | sharp   | 0.4      | 0.4   | 0.3    | 0.3           | 618 | 0.999             | 1.000     | 0.341    | 0.000*    | -0.038          | -0.420          | -0.168           | 0.135           | 1.691           | 100.0   |
| 0.3      | $R_-^2$  | sharp   | 0.4      | 0.6   | 0.3    | 0.3           | 618 | 0.976             | 1.000     | 0.786    | 0.000*    | -0.032          | -0.354          | -0.142           | 0.102           | 1.217           | 100.0   |
| 0.3      | $R_-^2$  | sharp   | 0.6      | 0.4   | 0.3    | 0.3           | 618 | 0.998             | 1.000     | 0.496    | 0.000*    | -0.032          | -0.352          | -0.141           | 0.114           | 1.236           | 100.0   |
| 0.3      | $R_-^2$  | sharp   | 0.6      | 0.6   | 0.3    | 0.3           | 618 | 0.937             | 1.000     | 0.890    | 0.000*    | -0.026          | -0.285          | -0.114           | 0.082           | 0.867           | 100.0   |
| 0.5      | $R_+^2$  | cons.   | 0.4      | 0.4   | 0.0    | 0.0           | 252 | 0.801             | 0.562     | 0.951    | 0.834     | -0.002          | 0.695           | -0.002           | -1.868          | 1.491           | 100.0   |
| 0.5      | $R_+^2$  | cons.   | 0.4      | 0.4   | 0.3    | 0.3           | 229 | 0.811             | 0.932     | 0.950    | 1.000     | 0.062           | 0.698           | 0.276            | 0.766           | 8.951           | 100.0   |
| 0.5      | $R_+^2$  | cons.   | 0.4      | 0.4   | 0.6    | 0.6           | 161 | 0.833             | 1.000     | 0.945    | 0.209     | 0.248           | 0.702           | 0.506            | 2.228           | 9.254           | 100.0   |
| 0.5      | $R_+^2$  | cons.   | 0.4      | 0.6   | 0.0    | 0.0           | 252 | 0.797             | 0.331     | 0.945    | 0.180     | -0.002          | 0.617           | -0.002           | -8.931          | -13.084         | 100.0   |
| 0.5      | $R_+^2$  | cons.   | 0.4      | 0.6   | 0.3    | 0.3           | 229 | 0.819             | 0.995     | 0.943    | 0.086     | 0.053           | 0.622           | 0.246            | 0.706           | 11.237          | 100.0   |
| 0.5      | $R_+^2$  | cons.   | 0.4      | 0.6   | 0.6    | 0.6           | 161 | 0.834             | 1.000     | 0.943    | 0.094     | 0.220           | 0.625           | 0.450            | 2.143           | 11.509          | 100.0   |
| 0.5      | $R_+^2$  | cons.   | 0.6      | 0.4   | 0.0    | 0.0           | 252 | 0.799             | 0.453     | 0.955    | 0.224     | -0.003          | 0.617           | -0.001           | -1.532          | -0.613          | 100.0   |
| 0.5      | $R_+^2$  | cons.   | 0.6      | 0.4   | 0.3    | 0.3           | 229 | 0.788             | 0.053     | 0.937    | 0.001*    | 0.056           | 0.620           | 0.247            | 0.676           | 11.415          | 100.0   |
| 0.5      | $R_+^2$  | cons.   | 0.6      | 0.4   | 0.6    | 0.6           | 161 | 0.811             | 0.938     | 0.939    | 0.006*    | 0.220           | 0.624           | 0.450            | 2.144           | 11.601          | 100.0   |
| 0.5      | $R_+^2$  | cons.   | 0.6      | 0.6   | 0.0    | 0.0           | 252 | 0.802             | 0.597     | 0.946    | 0.276     | -0.003          | 0.539           | -0.001           | 1.038           | -2.668          | 100.0   |
| 0.5      | $R_+^2$  | cons.   | 0.6      | 0.6   | 0.3    | 0.3           | 229 | 0.823             | 0.999     | 0.949    | 0.801     | 0.047           | 0.541           | 0.216            | 0.632           | 17.131          | 100.0   |
| 0.5      | $R_+^2$  | cons.   | 0.6      | 0.6   | 0.6    | 0.6           | 161 | 0.832             | 1.000     | 0.949    | 0.737     | 0.192           | 0.544           | 0.394            | 2.012           | 17.313          | 100.0   |
| 0.5      | $R_+^2$  | sharp   | 0.4      | 0.4   | 0.3    | 0.3           | 223 | 0.793             | 0.163     | 0.948    | 0.557     | 0.063           | 0.699           | 0.277            | 0.758           | 9.071           | 100.0   |

Continued on next page

Additional simulation results for design I when working assumption A1(b) is violated: response is highly correlated with  $(Y_1^{(d)} - \mu_1^{(d)})^2$

| $\delta$ | Response | Formula | $r_{-1}$ | $r_1$ | $\rho$ | $\rho_{\text{size}}$ | $n$ | $1 - \hat{\beta}$ | $p$ value | Coverage | $p$ value | $\text{Cor}(R, Y_0^2)$ | $\text{Cor}(R, Y_1^2)$ | $\text{Cor}(R, Y_0 Y_1)$ | $\text{Cov}(Y_0, Y_2)$ | $\text{Cov}(Y_1, Y_2)$ | % Valid |
|----------|----------|---------|----------|-------|--------|----------------------|-----|-------------------|-----------|----------|-----------|------------------------|------------------------|--------------------------|------------------------|------------------------|---------|
| 0.5      | $R_+^2$  | sharp   | 0.4      | 0.4   | 0.6    | 0.6                  | 150 | 0.787             | 0.036*    | 0.931    | 0.000*    | 0.247                  | 0.704                  | 0.507                    | 2.223                  | 9.164                  | 100.0   |
| 0.5      | $R_+^2$  | sharp   | 0.4      | 0.6   | 0.3    | 0.3                  | 223 | 0.791             | 0.123     | 0.943    | 0.071     | 0.055                  | 0.621                  | 0.246                    | 0.696                  | 11.096                 | 100.0   |
| 0.5      | $R_+^2$  | sharp   | 0.4      | 0.6   | 0.6    | 0.6                  | 150 | 0.803             | 0.666     | 0.948    | 0.557     | 0.221                  | 0.628                  | 0.453                    | 2.134                  | 11.586                 | 100.0   |
| 0.5      | $R_+^2$  | sharp   | 0.6      | 0.4   | 0.3    | 0.3                  | 223 | 0.792             | 0.142     | 0.944    | 0.132     | 0.054                  | 0.620                  | 0.247                    | 0.688                  | 11.585                 | 100.0   |
| 0.5      | $R_+^2$  | sharp   | 0.6      | 0.4   | 0.6    | 0.6                  | 150 | 0.785             | 0.022*    | 0.941    | 0.021*    | 0.219                  | 0.627                  | 0.451                    | 2.109                  | 11.586                 | 100.0   |
| 0.5      | $R_+^2$  | sharp   | 0.6      | 0.6   | 0.3    | 0.3                  | 223 | 0.800             | 0.507     | 0.944    | 0.132     | 0.047                  | 0.542                  | 0.216                    | 0.609                  | 17.692                 | 100.0   |
| 0.5      | $R_+^2$  | sharp   | 0.6      | 0.6   | 0.6    | 0.6                  | 150 | 0.790             | 0.090     | 0.943    | 0.094     | 0.193                  | 0.548                  | 0.395                    | 1.968                  | 17.396                 | 100.0   |
| 0.5      | $R_-^2$  | cons.   | 0.4      | 0.4   | 0.0    | 0.0                  | 252 | 0.990             | 1.000     | 0.661    | 0.000*    | 0.002                  | -0.425                 | 0.001                    | -1.936                 | 4.827                  | 100.0   |
| 0.5      | $R_-^2$  | cons.   | 0.4      | 0.4   | 0.3    | 0.3                  | 229 | 0.982             | 1.000     | 0.689    | 0.000*    | -0.038                 | -0.427                 | -0.171                   | 0.147                  | 1.700                  | 100.0   |
| 0.5      | $R_-^2$  | cons.   | 0.4      | 0.6   | 0.0    | 0.0                  | 252 | 0.941             | 1.000     | 0.878    | 0.000*    | 0.002                  | -0.357                 | 0.001                    | -2.046                 | -0.134                 | 100.0   |
| 0.5      | $R_-^2$  | cons.   | 0.4      | 0.6   | 0.3    | 0.3                  | 229 | 0.926             | 1.000     | 0.881    | 0.000*    | -0.033                 | -0.360                 | -0.144                   | 0.124                  | 1.321                  | 100.0   |
| 0.5      | $R_-^2$  | cons.   | 0.6      | 0.4   | 0.0    | 0.0                  | 252 | 0.974             | 1.000     | 0.759    | 0.000*    | 0.002                  | -0.356                 | -0.001                   | -1.615                 | 0.185                  | 100.0   |
| 0.5      | $R_-^2$  | cons.   | 0.6      | 0.4   | 0.3    | 0.3                  | 229 | 0.981             | 1.000     | 0.778    | 0.000*    | -0.031                 | -0.360                 | -0.146                   | 0.128                  | 1.206                  | 100.0   |
| 0.5      | $R_-^2$  | cons.   | 0.6      | 0.6   | 0.0    | 0.0                  | 252 | 0.896             | 1.000     | 0.923    | 0.000*    | 0.002                  | -0.288                 | -0.001                   | 1.074                  | -1.343                 | 100.0   |
| 0.5      | $R_-^2$  | cons.   | 0.6      | 0.6   | 0.3    | 0.3                  | 229 | 0.912             | 1.000     | 0.923    | 0.000*    | -0.026                 | -0.289                 | -0.118                   | 0.072                  | 0.875                  | 100.0   |
| 0.5      | $R_-^2$  | sharp   | 0.4      | 0.4   | 0.3    | 0.3                  | 223 | 0.980             | 1.000     | 0.694    | 0.000*    | -0.037                 | -0.428                 | -0.169                   | 0.138                  | 1.669                  | 100.0   |
| 0.5      | $R_-^2$  | sharp   | 0.4      | 0.6   | 0.3    | 0.3                  | 223 | 0.916             | 1.000     | 0.891    | 0.000*    | -0.031                 | -0.359                 | -0.141                   | 0.111                  | 1.230                  | 100.0   |
| 0.5      | $R_-^2$  | sharp   | 0.6      | 0.4   | 0.3    | 0.3                  | 223 | 0.972             | 1.000     | 0.776    | 0.000*    | -0.029                 | -0.360                 | -0.141                   | 0.120                  | 1.270                  | 100.0   |
| 0.5      | $R_-^2$  | sharp   | 0.6      | 0.6   | 0.3    | 0.3                  | 223 | 0.899             | 1.000     | 0.934    | 0.000*    | -0.024                 | -0.291                 | -0.114                   | 0.072                  | 0.853                  | 100.0   |



**Table S7:** Additional simulation results for design I when working assumption A1(c) is violated.

| $\delta$ | Response         | Formula | $r_{-1}$ | $r_1$ | $\rho$ | $\rho_{\text{size}}$ | $n$ | $1 - \hat{\beta}$ | $p$ value | Coverage | $p$ value | $\text{Cor}(R, Y_0^2)$ | $\text{Cor}(R, Y_1^2)$ | $\text{Cor}(R, Y_0 Y_1)$ | $\text{Cov}(Y_0, Y_2)$ | $\text{Cov}(Y_1, Y_2)$ | % Valid |
|----------|------------------|---------|----------|-------|--------|----------------------|-----|-------------------|-----------|----------|-----------|------------------------|------------------------|--------------------------|------------------------|------------------------|---------|
| 0.3      | $R_{\perp\perp}$ | cons.   | 0.4      | 0.4   | 0.3    | 0.3                  | 635 | 0.815             | 0.982     | 0.950    | 1.000     | -0.001                 | 0.001                  | 0.000                    | 2.476                  | 2.535                  | 100.0   |
| 0.3      | $R_{\perp\perp}$ | cons.   | 0.4      | 0.4   | 0.6    | 0.6                  | 447 | 0.827             | 1.000     | 0.949    | 0.867     | -0.001                 | -0.001                 | -0.001                   | 0.485                  | 0.488                  | 100.0   |
| 0.3      | $R_{\perp\perp}$ | cons.   | 0.4      | 0.4   | 0.8    | 0.8                  | 252 | 0.840             | 1.000     | 0.948    | 0.557     | -0.003                 | -0.002                 | -0.003                   | 0.162                  | 0.161                  | 100.0   |
| 0.3      | $R_{\perp\perp}$ | cons.   | 0.4      | 0.6   | 0.3    | 0.3                  | 635 | 0.807             | 0.848     | 0.949    | 0.801     | -0.001                 | -0.001                 | -0.001                   | 2.035                  | 2.071                  | 100.0   |
| 0.3      | $R_{\perp\perp}$ | cons.   | 0.4      | 0.6   | 0.6    | 0.6                  | 447 | 0.829             | 1.000     | 0.942    | 0.040*    | 0.001                  | -0.001                 | 0.000                    | 0.696                  | 0.690                  | 100.0   |
| 0.3      | $R_{\perp\perp}$ | cons.   | 0.4      | 0.6   | 0.8    | 0.8                  | 252 | 0.829             | 1.000     | 0.943    | 0.071     | 0.003                  | 0.003                  | 0.003                    | 0.219                  | 0.222                  | 100.0   |
| 0.3      | $R_{\perp\perp}$ | cons.   | 0.6      | 0.4   | 0.3    | 0.3                  | 635 | 0.810             | 0.912     | 0.945    | 0.209     | -0.001                 | 0.003                  | 0.001                    | 2.078                  | 2.099                  | 100.0   |
| 0.3      | $R_{\perp\perp}$ | cons.   | 0.6      | 0.4   | 0.6    | 0.6                  | 447 | 0.841             | 1.000     | 0.949    | 0.737     | -0.001                 | -0.001                 | 0.000                    | 0.687                  | 0.697                  | 100.0   |
| 0.3      | $R_{\perp\perp}$ | cons.   | 0.6      | 0.4   | 0.8    | 0.8                  | 252 | 0.859             | 1.000     | 0.951    | 0.900     | -0.000                 | 0.001                  | 0.000                    | 0.217                  | 0.215                  | 100.0   |
| 0.3      | $R_{\perp\perp}$ | cons.   | 0.6      | 0.6   | 0.3    | 0.3                  | 635 | 0.807             | 0.848     | 0.951    | 0.834     | 0.001                  | 0.001                  | -0.001                   | 1.640                  | 1.639                  | 100.0   |
| 0.3      | $R_{\perp\perp}$ | cons.   | 0.6      | 0.6   | 0.6    | 0.6                  | 447 | 0.838             | 1.000     | 0.947    | 0.503     | -0.000                 | -0.001                 | 0.001                    | 0.962                  | 0.962                  | 100.0   |
| 0.3      | $R_{\perp\perp}$ | cons.   | 0.6      | 0.6   | 0.8    | 0.8                  | 252 | 0.835             | 1.000     | 0.940    | 0.013*    | 0.002                  | -0.002                 | -0.001                   | 0.267                  | 0.265                  | 100.0   |
| 0.3      | $R_{\perp\perp}$ | sharp   | 0.4      | 0.4   | 0.3    | 0.3                  | 618 | 0.799             | 0.453     | 0.947    | 0.503     | 0.001                  | 0.001                  | -0.000                   | 2.474                  | 2.528                  | 100.0   |
| 0.3      | $R_{\perp\perp}$ | sharp   | 0.4      | 0.4   | 0.6    | 0.6                  | 416 | 0.813             | 0.961     | 0.943    | 0.071     | 0.001                  | 0.001                  | 0.001                    | 0.486                  | 0.485                  | 100.0   |
| 0.3      | $R_{\perp\perp}$ | sharp   | 0.4      | 0.4   | 0.8    | 0.8                  | 227 | 0.818             | 0.994     | 0.945    | 0.180     | 0.003                  | 0.002                  | 0.003                    | 0.171                  | 0.166                  | 100.0   |
| 0.3      | $R_{\perp\perp}$ | sharp   | 0.4      | 0.6   | 0.3    | 0.3                  | 618 | 0.803             | 0.650     | 0.946    | 0.276     | 0.002                  | 0.001                  | 0.001                    | 2.085                  | 2.148                  | 100.0   |
| 0.3      | $R_{\perp\perp}$ | sharp   | 0.4      | 0.6   | 0.6    | 0.6                  | 416 | 0.803             | 0.666     | 0.940    | 0.013*    | 0.000                  | -0.002                 | -0.002                   | 0.695                  | 0.685                  | 100.0   |
| 0.3      | $R_{\perp\perp}$ | sharp   | 0.4      | 0.6   | 0.8    | 0.8                  | 227 | 0.789             | 0.076     | 0.946    | 0.276     | 0.003                  | 0.001                  | 0.001                    | 0.219                  | 0.216                  | 100.0   |
| 0.3      | $R_{\perp\perp}$ | sharp   | 0.6      | 0.4   | 0.3    | 0.3                  | 618 | 0.810             | 0.925     | 0.949    | 0.867     | -0.002                 | 0.001                  | -0.002                   | 2.063                  | 2.049                  | 100.0   |
| 0.3      | $R_{\perp\perp}$ | sharp   | 0.6      | 0.4   | 0.6    | 0.6                  | 416 | 0.797             | 0.365     | 0.945    | 0.241     | -0.001                 | -0.001                 | -0.000                   | 0.691                  | 0.696                  | 100.0   |
| 0.3      | $R_{\perp\perp}$ | sharp   | 0.6      | 0.4   | 0.8    | 0.8                  | 227 | 0.815             | 0.982     | 0.946    | 0.315     | -0.002                 | -0.001                 | -0.002                   | 0.206                  | 0.208                  | 100.0   |
| 0.3      | $R_{\perp\perp}$ | sharp   | 0.6      | 0.6   | 0.3    | 0.3                  | 618 | 0.790             | 0.090     | 0.947    | 0.503     | -0.001                 | 0.002                  | 0.001                    | 1.682                  | 1.697                  | 100.0   |
| 0.3      | $R_{\perp\perp}$ | sharp   | 0.6      | 0.6   | 0.6    | 0.6                  | 416 | 0.804             | 0.730     | 0.945    | 0.180     | -0.002                 | -0.001                 | -0.002                   | 0.956                  | 0.962                  | 100.0   |
| 0.3      | $R_{\perp\perp}$ | sharp   | 0.6      | 0.6   | 0.8    | 0.8                  | 227 | 0.804             | 0.699     | 0.945    | 0.241     | 0.000                  | 0.002                  | 0.001                    | 0.269                  | 0.273                  | 100.0   |
| 0.5      | $R_{\perp\perp}$ | cons.   | 0.4      | 0.4   | 0.3    | 0.3                  | 229 | 0.814             | 0.977     | 0.946    | 0.276     | 0.002                  | 0.001                  | 0.002                    | 2.476                  | 2.532                  | 100.0   |
| 0.5      | $R_{\perp\perp}$ | cons.   | 0.4      | 0.4   | 0.6    | 0.6                  | 161 | 0.843             | 1.000     | 0.943    | 0.086     | -0.002                 | -0.003                 | -0.003                   | 0.473                  | 0.472                  | 100.0   |
| 0.5      | $R_{\perp\perp}$ | cons.   | 0.4      | 0.4   | 0.8    | 0.8                  | 91  | 0.839             | 1.000     | 0.942    | 0.040*    | 0.002                  | 0.006                  | 0.004                    | 0.166                  | 0.164                  | 100.0   |
| 0.5      | $R_{\perp\perp}$ | cons.   | 0.4      | 0.6   | 0.3    | 0.3                  | 229 | 0.816             | 0.989     | 0.942    | 0.059     | -0.001                 | 0.002                  | -0.004                   | 2.044                  | 2.090                  | 100.0   |
| 0.5      | $R_{\perp\perp}$ | cons.   | 0.4      | 0.6   | 0.6    | 0.6                  | 161 | 0.834             | 1.000     | 0.948    | 0.615     | 0.003                  | 0.004                  | 0.003                    | 0.697                  | 0.699                  | 100.0   |
| 0.5      | $R_{\perp\perp}$ | cons.   | 0.4      | 0.6   | 0.8    | 0.8                  | 91  | 0.837             | 1.000     | 0.936    | 0.001*    | -0.001                 | 0.001                  | 0.001                    | 0.204                  | 0.202                  | 99.9    |
| 0.5      | $R_{\perp\perp}$ | cons.   | 0.6      | 0.4   | 0.3    | 0.3                  | 229 | 0.814             | 0.972     | 0.952    | 0.586     | 0.003                  | 0.002                  | 0.002                    | 2.134                  | 2.152                  | 100.0   |
| 0.5      | $R_{\perp\perp}$ | cons.   | 0.6      | 0.4   | 0.6    | 0.6                  | 161 | 0.828             | 1.000     | 0.937    | 0.002*    | -0.002                 | -0.002                 | -0.002                   | 0.688                  | 0.695                  | 100.0   |
| 0.5      | $R_{\perp\perp}$ | cons.   | 0.6      | 0.4   | 0.8    | 0.8                  | 91  | 0.852             | 1.000     | 0.939    | 0.009*    | -0.004                 | -0.001                 | -0.001                   | 0.210                  | 0.211                  | 100.0   |
| 0.5      | $R_{\perp\perp}$ | cons.   | 0.6      | 0.6   | 0.3    | 0.3                  | 229 | 0.823             | 0.999     | 0.952    | 0.586     | 0.001                  | 0.002                  | -0.004                   | 1.607                  | 1.647                  | 100.0   |
| 0.5      | $R_{\perp\perp}$ | cons.   | 0.6      | 0.6   | 0.6    | 0.6                  | 161 | 0.837             | 1.000     | 0.942    | 0.059     | 0.001                  | 0.003                  | 0.002                    | 0.987                  | 0.987                  | 100.0   |
| 0.5      | $R_{\perp\perp}$ | cons.   | 0.6      | 0.6   | 0.8    | 0.8                  | 91  | 0.859             | 1.000     | 0.939    | 0.007*    | 0.004                  | 0.001                  | 0.004                    | 0.287                  | 0.286                  | 100.0   |
| 0.5      | $R_{\perp\perp}$ | sharp   | 0.4      | 0.4   | 0.3    | 0.3                  | 223 | 0.806             | 0.800     | 0.949    | 0.867     | 0.000                  | 0.002                  | 0.003                    | 2.550                  | 2.504                  | 100.0   |
| 0.5      | $R_{\perp\perp}$ | sharp   | 0.4      | 0.4   | 0.6    | 0.6                  | 150 | 0.814             | 0.972     | 0.929    | 0.000*    | 0.001                  | -0.003                 | -0.001                   | 0.488                  | 0.480                  | 100.0   |
| 0.5      | $R_{\perp\perp}$ | sharp   | 0.4      | 0.4   | 0.8    | 0.8                  | 82  | 0.809             | 0.891     | 0.940    | 0.011*    | 0.003                  | 0.002                  | 0.002                    | 0.167                  | 0.168                  | 99.9    |
| 0.5      | $R_{\perp\perp}$ | sharp   | 0.4      | 0.6   | 0.3    | 0.3                  | 223 | 0.802             | 0.632     | 0.947    | 0.451     | 0.003                  | -0.005                 | 0.005                    | 2.060                  | 2.023                  | 100.0   |
| 0.5      | $R_{\perp\perp}$ | sharp   | 0.4      | 0.6   | 0.6    | 0.6                  | 150 | 0.795             | 0.268     | 0.938    | 0.003*    | 0.002                  | 0.002                  | 0.003                    | 0.721                  | 0.706                  | 100.0   |
| 0.5      | $R_{\perp\perp}$ | sharp   | 0.4      | 0.6   | 0.8    | 0.8                  | 82  | 0.813             | 0.964     | 0.929    | 0.000*    | 0.003                  | 0.005                  | 0.004                    | 0.212                  | 0.218                  | 100.0   |
| 0.5      | $R_{\perp\perp}$ | sharp   | 0.6      | 0.4   | 0.3    | 0.3                  | 223 | 0.808             | 0.878     | 0.942    | 0.040*    | -0.002                 | -0.002                 | -0.001                   | 2.063                  | 2.101                  | 100.0   |
| 0.5      | $R_{\perp\perp}$ | sharp   | 0.6      | 0.4   | 0.6    | 0.6                  | 150 | 0.804             | 0.730     | 0.951    | 0.900     | 0.003                  | -0.002                 | 0.001                    | 0.704                  | 0.681                  | 100.0   |
| 0.5      | $R_{\perp\perp}$ | sharp   | 0.6      | 0.4   | 0.8    | 0.8                  | 82  | 0.807             | 0.835     | 0.930    | 0.000*    | -0.001                 | -0.005                 | -0.003                   | 0.225                  | 0.228                  | 100.0   |
| 0.5      | $R_{\perp\perp}$ | sharp   | 0.6      | 0.6   | 0.3    | 0.3                  | 223 | 0.815             | 0.980     | 0.943    | 0.086     | 0.001                  | 0.003                  | 0.001                    | 1.695                  | 1.700                  | 100.0   |
| 0.5      | $R_{\perp\perp}$ | sharp   | 0.6      | 0.6   | 0.6    | 0.6                  | 150 | 0.802             | 0.632     | 0.934    | 0.000*    | 0.004                  | -0.005                 | -0.002                   | 0.980                  | 0.970                  | 100.0   |

Continued on next page

Additional simulation results for design I when working assumption A1(c) is violated.

| $\delta$ | Response         | Formula | $r_{-1}$ | $r_1$ | $\rho$ | $\rho_{\text{size}}$ | $n$ | $1 - \hat{\beta}$ | $p$ value | Coverage | $p$ value | $\text{Cor}(R, Y_0^2)$ | $\text{Cor}(R, Y_1^2)$ | $\text{Cor}(R, Y_0 Y_1)$ | $\text{Cov}(Y_0, Y_2)$ | $\text{Cov}(Y_1, Y_2)$ | % Valid |
|----------|------------------|---------|----------|-------|--------|----------------------|-----|-------------------|-----------|----------|-----------|------------------------|------------------------|--------------------------|------------------------|------------------------|---------|
| 0.5      | $R_{\perp\perp}$ | sharp   | 0.6      | 0.6   | 0.8    | 0.8                  | 82  | 0.825             | 1.000     | 0.935    | 0.000*    | 0.006                  | 0.005                  | 0.006                    | 0.288                  | 0.279                  | 100.0   |

**Table S8:** Additional simulation results for design I when working assumption A2 is violated: the true within-person correlation structure is AR(1) with correlation  $\rho$

| $\delta$ | Response | Formula | $r_{-1}$ | $r_1$ | $\rho$ | $\rho_{\text{size}}$ | $n$ | $1 - \hat{\beta}$ | $p$ value | Coverage | $p$ value | $\text{Cor}(R, Y_0^2)$ | $\text{Cor}(R, Y_1^2)$ | $\text{Cor}(R, Y_0Y_1)$ | $\text{Cov}(Y_0, Y_2)$ | $\text{Cov}(Y_1, Y_2)$ | % Valid |
|----------|----------|---------|----------|-------|--------|----------------------|-----|-------------------|-----------|----------|-----------|------------------------|------------------------|-------------------------|------------------------|------------------------|---------|
| 0.3      | $R_+$    | cons.   | 0.4      | 0.4   | 0.0    | 0.0                  | 698 | 0.807             | 0.848     | 0.955    | 0.258     | 0.001                  | 0.077                  | -0.001                  | -2.906                 | 23.178                 | 100.0   |
| 0.3      | $R_+$    | cons.   | 0.4      | 0.4   | 0.3    | 0.3                  | 635 | 0.780             | 0.004*    | 0.949    | 0.801     | 0.008                  | 0.078                  | 0.032                   | -0.071                 | -0.102                 | 100.0   |
| 0.3      | $R_+$    | cons.   | 0.4      | 0.4   | 0.6    | 0.6                  | 447 | 0.728             | 0.000*    | 0.948    | 0.675     | 0.028                  | 0.078                  | 0.057                   | -0.093                 | -0.095                 | 100.0   |
| 0.3      | $R_+$    | cons.   | 0.4      | 0.4   | 0.8    | 0.8                  | 252 | 0.721             | 0.000*    | 0.947    | 0.402     | 0.051                  | 0.078                  | 0.069                   | -0.102                 | -0.101                 | 100.0   |
| 0.3      | $R_+$    | cons.   | 0.4      | 0.6   | 0.0    | 0.0                  | 698 | 0.784             | 0.016*    | 0.945    | 0.209     | -0.001                 | 0.012                  | -0.001                  | -27.792                | -2.362                 | 100.0   |
| 0.3      | $R_+$    | cons.   | 0.4      | 0.6   | 0.3    | 0.3                  | 635 | 0.781             | 0.006*    | 0.956    | 0.167     | 0.002                  | 0.009                  | 0.005                   | -0.011                 | -0.016                 | 100.0   |
| 0.3      | $R_+$    | cons.   | 0.4      | 0.6   | 0.6    | 0.6                  | 447 | 0.721             | 0.000*    | 0.947    | 0.402     | 0.003                  | 0.010                  | 0.009                   | -0.004                 | -0.010                 | 100.0   |
| 0.3      | $R_+$    | cons.   | 0.4      | 0.6   | 0.8    | 0.8                  | 252 | 0.707             | 0.000*    | 0.944    | 0.132     | 0.007                  | 0.010                  | 0.008                   | -0.007                 | -0.007                 | 100.0   |
| 0.3      | $R_+$    | cons.   | 0.6      | 0.4   | 0.0    | 0.0                  | 698 | 0.793             | 0.186     | 0.941    | 0.026*    | 0.001                  | 0.011                  | -0.001                  | 0.386                  | -4.877                 | 100.0   |
| 0.3      | $R_+$    | cons.   | 0.6      | 0.4   | 0.3    | 0.3                  | 635 | 0.786             | 0.027*    | 0.950    | 0.967     | 0.001                  | 0.009                  | 0.004                   | 0.019                  | 0.004                  | 100.0   |
| 0.3      | $R_+$    | cons.   | 0.6      | 0.4   | 0.6    | 0.6                  | 447 | 0.729             | 0.000*    | 0.935    | 0.000*    | 0.003                  | 0.009                  | 0.007                   | -0.006                 | -0.007                 | 100.0   |
| 0.3      | $R_+$    | cons.   | 0.6      | 0.6   | 0.0    | 0.0                  | 698 | 0.799             | 0.471     | 0.947    | 0.451     | -0.001                 | -0.061                 | -0.001                  | -5.979                 | -2.460                 | 100.0   |
| 0.3      | $R_+$    | cons.   | 0.6      | 0.6   | 0.3    | 0.3                  | 635 | 0.775             | 0.000*    | 0.948    | 0.675     | -0.006                 | -0.061                 | -0.024                  | 0.098                  | 0.072                  | 100.0   |
| 0.3      | $R_+$    | cons.   | 0.6      | 0.6   | 0.6    | 0.6                  | 447 | 0.727             | 0.000*    | 0.942    | 0.040*    | -0.022                 | -0.061                 | -0.044                  | 0.083                  | 0.088                  | 100.0   |
| 0.3      | $R_+$    | sharp   | 0.4      | 0.4   | 0.3    | 0.3                  | 618 | 0.774             | 0.000*    | 0.945    | 0.241     | 0.007                  | 0.078                  | 0.032                   | -0.096                 | -0.099                 | 100.0   |
| 0.3      | $R_+$    | sharp   | 0.4      | 0.4   | 0.6    | 0.6                  | 416 | 0.711             | 0.000*    | 0.942    | 0.049*    | 0.030                  | 0.078                  | 0.058                   | -0.101                 | -0.097                 | 100.0   |
| 0.3      | $R_+$    | sharp   | 0.4      | 0.4   | 0.8    | 0.8                  | 227 | 0.689             | 0.000*    | 0.946    | 0.276     | 0.049                  | 0.077                  | 0.068                   | -0.109                 | -0.104                 | 100.0   |
| 0.3      | $R_+$    | sharp   | 0.4      | 0.6   | 0.3    | 0.3                  | 618 | 0.771             | 0.000*    | 0.949    | 0.801     | 0.002                  | 0.010                  | 0.005                   | 0.028                  | -0.006                 | 100.0   |
| 0.3      | $R_+$    | sharp   | 0.4      | 0.6   | 0.6    | 0.6                  | 416 | 0.695             | 0.000*    | 0.944    | 0.154     | 0.003                  | 0.008                  | 0.007                   | -0.011                 | -0.011                 | 100.0   |
| 0.3      | $R_+$    | sharp   | 0.4      | 0.6   | 0.8    | 0.8                  | 227 | 0.671             | 0.000*    | 0.944    | 0.111     | 0.007                  | 0.011                  | 0.009                   | -0.021                 | -0.016                 | 100.0   |
| 0.3      | $R_+$    | sharp   | 0.6      | 0.4   | 0.3    | 0.3                  | 618 | 0.763             | 0.000*    | 0.947    | 0.503     | 0.003                  | 0.011                  | 0.006                   | -0.008                 | -0.010                 | 100.0   |
| 0.3      | $R_+$    | sharp   | 0.6      | 0.4   | 0.6    | 0.6                  | 416 | 0.711             | 0.000*    | 0.951    | 0.900     | 0.006                  | 0.009                  | 0.007                   | 0.004                  | -0.005                 | 100.0   |
| 0.3      | $R_+$    | sharp   | 0.6      | 0.6   | 0.3    | 0.3                  | 618 | 0.773             | 0.000*    | 0.944    | 0.132     | -0.005                 | -0.059                 | -0.023                  | 0.059                  | 0.083                  | 100.0   |
| 0.3      | $R_+$    | sharp   | 0.6      | 0.6   | 0.6    | 0.6                  | 416 | 0.713             | 0.000*    | 0.950    | 0.967     | -0.022                 | -0.061                 | -0.044                  | 0.079                  | 0.078                  | 100.0   |
| 0.3      | $R_-$    | cons.   | 0.4      | 0.4   | 0.0    | 0.0                  | 698 | 0.803             | 0.650     | 0.953    | 0.476     | 0.001                  | 0.079                  | 0.001                   | 2.023                  | -3.344                 | 100.0   |
| 0.3      | $R_-$    | cons.   | 0.4      | 0.4   | 0.3    | 0.3                  | 635 | 0.764             | 0.000*    | 0.954    | 0.295     | 0.008                  | 0.079                  | 0.031                   | -0.096                 | -0.097                 | 100.0   |
| 0.3      | $R_-$    | cons.   | 0.4      | 0.4   | 0.6    | 0.6                  | 447 | 0.654             | 0.000*    | 0.949    | 0.737     | 0.027                  | 0.079                  | 0.057                   | -0.102                 | -0.102                 | 100.0   |
| 0.3      | $R_-$    | cons.   | 0.4      | 0.4   | 0.8    | 0.8                  | 252 | 0.578             | 0.000*    | 0.943    | 0.094     | 0.051                  | 0.079                  | 0.069                   | -0.099                 | -0.102                 | 100.0   |
| 0.3      | $R_-$    | cons.   | 0.4      | 0.6   | 0.0    | 0.0                  | 698 | 0.792             | 0.132     | 0.949    | 0.867     | -0.001                 | 0.013                  | 0.001                   | -0.712                 | 4.656                  | 100.0   |
| 0.3      | $R_-$    | cons.   | 0.4      | 0.6   | 0.3    | 0.3                  | 635 | 0.748             | 0.000*    | 0.953    | 0.530     | 0.002                  | 0.011                  | 0.003                   | -0.072                 | -0.007                 | 100.0   |
| 0.3      | $R_-$    | cons.   | 0.4      | 0.6   | 0.6    | 0.6                  | 447 | 0.680             | 0.000*    | 0.948    | 0.615     | 0.004                  | 0.010                  | 0.007                   | -0.001                 | -0.007                 | 100.0   |
| 0.3      | $R_-$    | cons.   | 0.4      | 0.6   | 0.8    | 0.8                  | 252 | 0.604             | 0.000*    | 0.945    | 0.180     | 0.007                  | 0.010                  | 0.009                   | -0.003                 | -0.003                 | 100.0   |
| 0.3      | $R_-$    | cons.   | 0.6      | 0.4   | 0.0    | 0.0                  | 698 | 0.803             | 0.683     | 0.950    | 0.967     | 0.001                  | 0.014                  | 0.001                   | 1.690                  | -28.430                | 100.0   |
| 0.3      | $R_-$    | cons.   | 0.6      | 0.4   | 0.3    | 0.3                  | 635 | 0.746             | 0.000*    | 0.946    | 0.315     | 0.000                  | 0.010                  | 0.002                   | -0.006                 | -0.015                 | 100.0   |
| 0.3      | $R_-$    | cons.   | 0.6      | 0.4   | 0.6    | 0.6                  | 447 | 0.684             | 0.000*    | 0.947    | 0.402     | 0.004                  | 0.010                  | 0.007                   | -0.017                 | -0.013                 | 100.0   |
| 0.3      | $R_-$    | cons.   | 0.6      | 0.6   | 0.0    | 0.0                  | 698 | 0.806             | 0.787     | 0.949    | 0.867     | -0.001                 | -0.059                 | 0.001                   | 5.713                  | -1.166                 | 100.0   |
| 0.3      | $R_-$    | cons.   | 0.6      | 0.6   | 0.3    | 0.3                  | 635 | 0.760             | 0.000*    | 0.948    | 0.615     | -0.006                 | -0.060                 | -0.025                  | 0.105                  | 0.086                  | 100.0   |
| 0.3      | $R_-$    | cons.   | 0.6      | 0.6   | 0.6    | 0.6                  | 447 | 0.678             | 0.000*    | 0.943    | 0.086     | -0.021                 | -0.060                 | -0.044                  | 0.084                  | 0.084                  | 100.0   |
| 0.3      | $R_-$    | sharp   | 0.4      | 0.4   | 0.3    | 0.3                  | 618 | 0.734             | 0.000*    | 0.942    | 0.049*    | 0.007                  | 0.078                  | 0.031                   | -0.106                 | -0.104                 | 100.0   |
| 0.3      | $R_-$    | sharp   | 0.4      | 0.4   | 0.6    | 0.6                  | 416 | 0.642             | 0.000*    | 0.942    | 0.040*    | 0.028                  | 0.079                  | 0.057                   | -0.102                 | -0.103                 | 100.0   |
| 0.3      | $R_-$    | sharp   | 0.4      | 0.4   | 0.8    | 0.8                  | 227 | 0.548             | 0.000*    | 0.941    | 0.026*    | 0.050                  | 0.080                  | 0.070                   | -0.099                 | -0.100                 | 100.0   |
| 0.3      | $R_-$    | sharp   | 0.4      | 0.6   | 0.3    | 0.3                  | 618 | 0.744             | 0.000*    | 0.942    | 0.040*    | 0.001                  | 0.010                  | 0.004                   | -0.067                 | -0.011                 | 100.0   |
| 0.3      | $R_-$    | sharp   | 0.4      | 0.6   | 0.6    | 0.6                  | 416 | 0.650             | 0.000*    | 0.952    | 0.645     | 0.005                  | 0.010                  | 0.007                   | 0.001                  | -0.004                 | 100.0   |
| 0.3      | $R_-$    | sharp   | 0.4      | 0.6   | 0.8    | 0.8                  | 227 | 0.579             | 0.000*    | 0.942    | 0.040*    | 0.009                  | 0.015                  | 0.014                   | -0.005                 | -0.007                 | 100.0   |
| 0.3      | $R_-$    | sharp   | 0.6      | 0.4   | 0.3    | 0.3                  | 618 | 0.728             | 0.000*    | 0.948    | 0.615     | 0.002                  | 0.009                  | 0.003                   | -0.015                 | -0.008                 | 100.0   |
| 0.3      | $R_-$    | sharp   | 0.6      | 0.4   | 0.6    | 0.6                  | 416 | 0.616             | 0.000*    | 0.948    | 0.615     | 0.004                  | 0.010                  | 0.008                   | -0.009                 | -0.009                 | 100.0   |

Continued on next page

Additional simulation results for design I when working assumption A2 is violated: the true within-person correlation structure is AR(1) with correlation  $\rho$

| $\delta$ | Response         | Formula | $r_{-1}$ | $r_1$ | $\rho$ | $\rho_{\text{size}}$ | $n$ | $1 - \hat{\beta}$ | $p$ value | Coverage | $p$ value | $\text{Cor}(R, Y_0^2)$ | $\text{Cor}(R, Y_1^2)$ | $\text{Cor}(R, Y_0Y_1)$ | $\text{Cov}(Y_0, Y_2)$ | $\text{Cov}(Y_1, Y_2)$ | % Valid |
|----------|------------------|---------|----------|-------|--------|----------------------|-----|-------------------|-----------|----------|-----------|------------------------|------------------------|-------------------------|------------------------|------------------------|---------|
| 0.3      | $R_-$            | sharp   | 0.6      | 0.6   | 0.3    | 0.3                  | 618 | 0.741             | 0.000*    | 0.948    | 0.615     | -0.006                 | -0.061                 | -0.026                  | 0.057                  | 0.081                  | 100.0   |
| 0.3      | $R_-$            | sharp   | 0.6      | 0.6   | 0.6    | 0.6                  | 416 | 0.662             | 0.000*    | 0.947    | 0.402     | -0.023                 | -0.059                 | -0.045                  | 0.080                  | 0.084                  | 100.0   |
| 0.3      | $R_{\perp\perp}$ | cons.   | 0.4      | 0.4   | 0.0    | 0.0                  | 698 | 0.798             | 0.399     | 0.945    | 0.241     | -0.000                 | -0.001                 | 0.001                   | 0.329                  | -0.532                 | 100.0   |
| 0.3      | $R_{\perp\perp}$ | cons.   | 0.4      | 0.4   | 0.3    | 0.3                  | 635 | 0.778             | 0.002*    | 0.951    | 0.769     | 0.002                  | 0.000                  | -0.000                  | -0.008                 | 0.007                  | 100.0   |
| 0.3      | $R_{\perp\perp}$ | cons.   | 0.4      | 0.4   | 0.6    | 0.6                  | 447 | 0.688             | 0.000*    | 0.942    | 0.040*    | 0.001                  | -0.001                 | 0.000                   | -0.007                 | -0.006                 | 100.0   |
| 0.3      | $R_{\perp\perp}$ | cons.   | 0.4      | 0.4   | 0.8    | 0.8                  | 252 | 0.656             | 0.000*    | 0.951    | 0.769     | 0.002                  | 0.002                  | 0.002                   | 0.002                  | 0.002                  | 100.0   |
| 0.3      | $R_{\perp\perp}$ | cons.   | 0.4      | 0.6   | 0.0    | 0.0                  | 698 | 0.804             | 0.699     | 0.952    | 0.706     | -0.001                 | -0.000                 | 0.002                   | 1.966                  | -1.472                 | 100.0   |
| 0.3      | $R_{\perp\perp}$ | cons.   | 0.4      | 0.6   | 0.3    | 0.3                  | 635 | 0.769             | 0.000*    | 0.949    | 0.867     | 0.000                  | 0.001                  | -0.001                  | -0.007                 | 0.012                  | 100.0   |
| 0.3      | $R_{\perp\perp}$ | cons.   | 0.4      | 0.6   | 0.6    | 0.6                  | 447 | 0.685             | 0.000*    | 0.952    | 0.645     | 0.002                  | -0.002                 | 0.002                   | -0.002                 | -0.001                 | 100.0   |
| 0.3      | $R_{\perp\perp}$ | cons.   | 0.4      | 0.6   | 0.8    | 0.8                  | 252 | 0.639             | 0.000*    | 0.949    | 0.867     | 0.003                  | 0.001                  | 0.002                   | 0.008                  | 0.005                  | 100.0   |
| 0.3      | $R_{\perp\perp}$ | cons.   | 0.6      | 0.4   | 0.0    | 0.0                  | 698 | 0.795             | 0.253     | 0.953    | 0.426     | 0.001                  | 0.000                  | -0.002                  | 2.232                  | -0.917                 | 100.0   |
| 0.3      | $R_{\perp\perp}$ | cons.   | 0.6      | 0.4   | 0.3    | 0.3                  | 635 | 0.770             | 0.000*    | 0.946    | 0.357     | -0.000                 | -0.001                 | 0.001                   | 0.006                  | 0.007                  | 100.0   |
| 0.3      | $R_{\perp\perp}$ | cons.   | 0.6      | 0.4   | 0.6    | 0.6                  | 447 | 0.696             | 0.000*    | 0.949    | 0.801     | -0.002                 | 0.002                  | -0.002                  | -0.000                 | 0.002                  | 100.0   |
| 0.3      | $R_{\perp\perp}$ | cons.   | 0.6      | 0.4   | 0.8    | 0.8                  | 252 | 0.661             | 0.000*    | 0.944    | 0.154     | -0.003                 | -0.001                 | -0.002                  | -0.005                 | -0.002                 | 100.0   |
| 0.3      | $R_{\perp\perp}$ | cons.   | 0.6      | 0.6   | 0.0    | 0.0                  | 698 | 0.796             | 0.283     | 0.942    | 0.059     | 0.000                  | 0.001                  | -0.001                  | 1.919                  | -1.397                 | 100.0   |
| 0.3      | $R_{\perp\perp}$ | cons.   | 0.6      | 0.6   | 0.3    | 0.3                  | 635 | 0.768             | 0.000*    | 0.953    | 0.476     | -0.002                 | -0.000                 | 0.000                   | -0.022                 | -0.001                 | 100.0   |
| 0.3      | $R_{\perp\perp}$ | cons.   | 0.6      | 0.6   | 0.6    | 0.6                  | 447 | 0.710             | 0.000*    | 0.946    | 0.357     | -0.001                 | 0.001                  | -0.000                  | 0.005                  | 0.008                  | 100.0   |
| 0.3      | $R_{\perp\perp}$ | cons.   | 0.6      | 0.6   | 0.8    | 0.8                  | 252 | 0.657             | 0.000*    | 0.945    | 0.241     | -0.002                 | -0.002                 | -0.002                  | 0.001                  | 0.001                  | 100.0   |
| 0.3      | $R_{\perp\perp}$ | sharp   | 0.4      | 0.4   | 0.3    | 0.3                  | 618 | 0.756             | 0.000*    | 0.949    | 0.737     | -0.001                 | 0.001                  | 0.001                   | -0.006                 | 0.004                  | 100.0   |
| 0.3      | $R_{\perp\perp}$ | sharp   | 0.4      | 0.4   | 0.6    | 0.6                  | 416 | 0.671             | 0.000*    | 0.952    | 0.706     | 0.002                  | -0.002                 | 0.002                   | 0.006                  | 0.001                  | 100.0   |
| 0.3      | $R_{\perp\perp}$ | sharp   | 0.4      | 0.4   | 0.8    | 0.8                  | 227 | 0.606             | 0.000*    | 0.941    | 0.033*    | -0.001                 | 0.003                  | -0.001                  | 0.001                  | 0.003                  | 100.0   |
| 0.3      | $R_{\perp\perp}$ | sharp   | 0.4      | 0.6   | 0.3    | 0.3                  | 618 | 0.749             | 0.000*    | 0.949    | 0.801     | -0.001                 | -0.002                 | -0.002                  | -0.042                 | -0.006                 | 100.0   |
| 0.3      | $R_{\perp\perp}$ | sharp   | 0.4      | 0.6   | 0.6    | 0.6                  | 416 | 0.662             | 0.000*    | 0.947    | 0.402     | -0.003                 | -0.002                 | -0.002                  | -0.013                 | -0.004                 | 100.0   |
| 0.3      | $R_{\perp\perp}$ | sharp   | 0.4      | 0.6   | 0.8    | 0.8                  | 227 | 0.606             | 0.000*    | 0.939    | 0.007*    | -0.001                 | -0.002                 | -0.001                  | -0.000                 | -0.001                 | 100.0   |
| 0.3      | $R_{\perp\perp}$ | sharp   | 0.6      | 0.4   | 0.3    | 0.3                  | 618 | 0.764             | 0.000*    | 0.943    | 0.094     | 0.001                  | 0.002                  | 0.002                   | 0.010                  | 0.004                  | 100.0   |
| 0.3      | $R_{\perp\perp}$ | sharp   | 0.6      | 0.4   | 0.6    | 0.6                  | 416 | 0.666             | 0.000*    | 0.947    | 0.451     | 0.003                  | 0.002                  | 0.002                   | 0.007                  | -0.001                 | 100.0   |
| 0.3      | $R_{\perp\perp}$ | sharp   | 0.6      | 0.4   | 0.8    | 0.8                  | 227 | 0.605             | 0.000*    | 0.940    | 0.013*    | 0.001                  | 0.002                  | 0.001                   | 0.002                  | 0.002                  | 100.0   |
| 0.3      | $R_{\perp\perp}$ | sharp   | 0.6      | 0.6   | 0.3    | 0.3                  | 618 | 0.752             | 0.000*    | 0.952    | 0.706     | 0.001                  | -0.001                 | -0.001                  | -0.009                 | -0.003                 | 100.0   |
| 0.3      | $R_{\perp\perp}$ | sharp   | 0.6      | 0.6   | 0.6    | 0.6                  | 416 | 0.685             | 0.000*    | 0.942    | 0.049*    | -0.002                 | 0.002                  | -0.002                  | -0.002                 | -0.002                 | 100.0   |
| 0.3      | $R_{\perp\perp}$ | sharp   | 0.6      | 0.6   | 0.8    | 0.8                  | 227 | 0.617             | 0.000*    | 0.945    | 0.209     | 0.001                  | -0.003                 | 0.001                   | -0.001                 | -0.003                 | 100.0   |
| 0.5      | $R_+$            | cons.   | 0.4      | 0.4   | 0.0    | 0.0                  | 252 | 0.801             | 0.562     | 0.942    | 0.059     | -0.001                 | 0.079                  | -0.003                  | 15.305                 | 0.679                  | 100.0   |
| 0.5      | $R_+$            | cons.   | 0.4      | 0.4   | 0.3    | 0.3                  | 229 | 0.771             | 0.000*    | 0.942    | 0.040*    | 0.007                  | 0.079                  | 0.032                   | -0.089                 | -0.099                 | 100.0   |
| 0.5      | $R_+$            | cons.   | 0.4      | 0.4   | 0.6    | 0.6                  | 161 | 0.742             | 0.000*    | 0.935    | 0.000*    | 0.031                  | 0.081                  | 0.061                   | -0.101                 | -0.101                 | 100.0   |
| 0.5      | $R_+$            | cons.   | 0.4      | 0.4   | 0.8    | 0.8                  | 91  | 0.725             | 0.000*    | 0.934    | 0.000*    | 0.054                  | 0.081                  | 0.072                   | -0.112                 | -0.106                 | 100.0   |
| 0.5      | $R_+$            | cons.   | 0.4      | 0.6   | 0.0    | 0.0                  | 252 | 0.799             | 0.471     | 0.941    | 0.021*    | -0.002                 | 0.011                  | -0.002                  | 12.072                 | 1.704                  | 100.0   |
| 0.5      | $R_+$            | cons.   | 0.4      | 0.6   | 0.3    | 0.3                  | 229 | 0.781             | 0.006*    | 0.944    | 0.111     | -0.002                 | 0.011                  | 0.003                   | -0.043                 | -0.020                 | 100.0   |
| 0.5      | $R_+$            | cons.   | 0.4      | 0.6   | 0.6    | 0.6                  | 161 | 0.732             | 0.000*    | 0.944    | 0.111     | 0.008                  | 0.012                  | 0.012                   | -0.013                 | -0.006                 | 100.0   |
| 0.5      | $R_+$            | cons.   | 0.4      | 0.6   | 0.8    | 0.8                  | 91  | 0.713             | 0.000*    | 0.945    | 0.180     | 0.010                  | 0.011                  | 0.012                   | -0.019                 | -0.012                 | 100.0   |
| 0.5      | $R_+$            | cons.   | 0.6      | 0.4   | 0.0    | 0.0                  | 252 | 0.795             | 0.268     | 0.947    | 0.402     | -0.003                 | 0.010                  | -0.002                  | 2.184                  | 1.344                  | 100.0   |
| 0.5      | $R_+$            | cons.   | 0.6      | 0.4   | 0.3    | 0.3                  | 229 | 0.796             | 0.315     | 0.942    | 0.059     | 0.002                  | 0.009                  | 0.003                   | 0.063                  | -0.010                 | 100.0   |
| 0.5      | $R_+$            | cons.   | 0.6      | 0.4   | 0.6    | 0.6                  | 161 | 0.749             | 0.000*    | 0.936    | 0.001*    | 0.005                  | 0.010                  | 0.009                   | 0.008                  | 0.002                  | 100.0   |
| 0.5      | $R_+$            | cons.   | 0.6      | 0.6   | 0.0    | 0.0                  | 252 | 0.797             | 0.348     | 0.937    | 0.002*    | -0.004                 | -0.060                 | -0.002                  | -0.466                 | -1.418                 | 100.0   |
| 0.5      | $R_+$            | cons.   | 0.6      | 0.6   | 0.3    | 0.3                  | 229 | 0.771             | 0.000*    | 0.953    | 0.426     | -0.009                 | -0.061                 | -0.026                  | 0.013                  | 0.053                  | 100.0   |
| 0.5      | $R_+$            | cons.   | 0.6      | 0.6   | 0.6    | 0.6                  | 161 | 0.749             | 0.000*    | 0.946    | 0.276     | -0.021                 | -0.060                 | -0.041                  | 0.087                  | 0.084                  | 100.0   |
| 0.5      | $R_+$            | sharp   | 0.4      | 0.4   | 0.3    | 0.3                  | 223 | 0.780             | 0.003*    | 0.950    | 0.933     | 0.007                  | 0.077                  | 0.032                   | -0.125                 | -0.108                 | 100.0   |

Continued on next page

Additional simulation results for design I when working assumption A2 is violated: the true within-person correlation structure is AR(1) with correlation  $\rho$

| $\delta$ | Response         | Formula | $r_{-1}$ | $r_1$ | $\rho$ | $\rho_{\text{size}}$ | $n$ | $1 - \hat{\beta}$ | $p$ value | Coverage | $p$ value | $\text{Cor}(R, Y_0^2)$ | $\text{Cor}(R, Y_1^2)$ | $\text{Cor}(R, Y_0Y_1)$ | $\text{Cov}(Y_0, Y_2)$ | $\text{Cov}(Y_1, Y_2)$ | % Valid |
|----------|------------------|---------|----------|-------|--------|----------------------|-----|-------------------|-----------|----------|-----------|------------------------|------------------------|-------------------------|------------------------|------------------------|---------|
| 0.5      | $R_+$            | sharp   | 0.4      | 0.4   | 0.6    | 0.6                  | 150 | 0.707             | 0.000*    | 0.945    | 0.241     | 0.030                  | 0.082                  | 0.060                   | -0.107                 | -0.103                 | 100.0   |
| 0.5      | $R_+$            | sharp   | 0.4      | 0.4   | 0.8    | 0.8                  | 82  | 0.693             | 0.000*    | 0.941    | 0.026*    | 0.052                  | 0.082                  | 0.073                   | -0.118                 | -0.108                 | 99.9    |
| 0.5      | $R_+$            | sharp   | 0.4      | 0.6   | 0.3    | 0.3                  | 223 | 0.778             | 0.002*    | 0.942    | 0.049*    | 0.002                  | 0.009                  | 0.004                   | 0.038                  | -0.013                 | 100.0   |
| 0.5      | $R_+$            | sharp   | 0.4      | 0.6   | 0.6    | 0.6                  | 150 | 0.713             | 0.000*    | 0.948    | 0.557     | 0.006                  | 0.015                  | 0.012                   | -0.006                 | -0.007                 | 100.0   |
| 0.5      | $R_+$            | sharp   | 0.4      | 0.6   | 0.8    | 0.8                  | 82  | 0.670             | 0.000*    | 0.940    | 0.011*    | 0.008                  | 0.013                  | 0.010                   | -0.013                 | -0.000                 | 99.9    |
| 0.5      | $R_+$            | sharp   | 0.6      | 0.4   | 0.3    | 0.3                  | 223 | 0.778             | 0.002*    | 0.941    | 0.033*    | 0.004                  | 0.008                  | 0.004                   | -0.016                 | -0.025                 | 100.0   |
| 0.5      | $R_+$            | sharp   | 0.6      | 0.4   | 0.6    | 0.6                  | 150 | 0.713             | 0.000*    | 0.939    | 0.009*    | 0.003                  | 0.009                  | 0.007                   | -0.005                 | -0.008                 | 100.0   |
| 0.5      | $R_+$            | sharp   | 0.6      | 0.6   | 0.3    | 0.3                  | 223 | 0.770             | 0.000*    | 0.948    | 0.615     | -0.004                 | -0.061                 | -0.024                  | 0.123                  | 0.084                  | 100.0   |
| 0.5      | $R_+$            | sharp   | 0.6      | 0.6   | 0.6    | 0.6                  | 150 | 0.708             | 0.000*    | 0.947    | 0.402     | -0.023                 | -0.064                 | -0.045                  | 0.083                  | 0.078                  | 100.0   |
| 0.5      | $R_-$            | cons.   | 0.4      | 0.4   | 0.0    | 0.0                  | 252 | 0.798             | 0.417     | 0.955    | 0.224     | 0.004                  | 0.079                  | 0.001                   | 5.406                  | -0.139                 | 100.0   |
| 0.5      | $R_-$            | cons.   | 0.4      | 0.4   | 0.3    | 0.3                  | 229 | 0.763             | 0.000*    | 0.942    | 0.040*    | 0.009                  | 0.079                  | 0.033                   | -0.100                 | -0.103                 | 100.0   |
| 0.5      | $R_-$            | cons.   | 0.4      | 0.4   | 0.6    | 0.6                  | 161 | 0.678             | 0.000*    | 0.936    | 0.001*    | 0.026                  | 0.078                  | 0.054                   | -0.116                 | -0.112                 | 100.0   |
| 0.5      | $R_-$            | cons.   | 0.4      | 0.4   | 0.8    | 0.8                  | 91  | 0.583             | 0.000*    | 0.937    | 0.002*    | 0.051                  | 0.080                  | 0.070                   | -0.091                 | -0.099                 | 100.0   |
| 0.5      | $R_-$            | cons.   | 0.4      | 0.6   | 0.0    | 0.0                  | 252 | 0.799             | 0.453     | 0.946    | 0.315     | 0.004                  | 0.009                  | 0.001                   | 2.658                  | 2.910                  | 100.0   |
| 0.5      | $R_-$            | cons.   | 0.4      | 0.6   | 0.3    | 0.3                  | 229 | 0.755             | 0.000*    | 0.941    | 0.033*    | 0.001                  | 0.010                  | 0.006                   | -0.046                 | -0.002                 | 100.0   |
| 0.5      | $R_-$            | cons.   | 0.4      | 0.6   | 0.6    | 0.6                  | 161 | 0.674             | 0.000*    | 0.946    | 0.315     | 0.002                  | 0.011                  | 0.007                   | -0.028                 | -0.016                 | 100.0   |
| 0.5      | $R_-$            | cons.   | 0.4      | 0.6   | 0.8    | 0.8                  | 91  | 0.618             | 0.000*    | 0.938    | 0.003*    | 0.005                  | 0.011                  | 0.007                   | -0.002                 | -0.003                 | 99.9    |
| 0.5      | $R_-$            | cons.   | 0.6      | 0.4   | 0.0    | 0.0                  | 252 | 0.800             | 0.507     | 0.939    | 0.006*    | 0.002                  | 0.010                  | 0.001                   | -0.376                 | 1.378                  | 100.0   |
| 0.5      | $R_-$            | cons.   | 0.6      | 0.4   | 0.3    | 0.3                  | 229 | 0.754             | 0.000*    | 0.938    | 0.003*    | 0.001                  | 0.011                  | 0.006                   | -0.028                 | -0.016                 | 100.0   |
| 0.5      | $R_-$            | cons.   | 0.6      | 0.4   | 0.6    | 0.6                  | 161 | 0.672             | 0.000*    | 0.946    | 0.276     | 0.003                  | 0.012                  | 0.007                   | -0.025                 | -0.011                 | 100.0   |
| 0.5      | $R_-$            | cons.   | 0.6      | 0.6   | 0.0    | 0.0                  | 252 | 0.810             | 0.919     | 0.947    | 0.402     | 0.001                  | -0.062                 | 0.002                   | 1.618                  | -1.119                 | 100.0   |
| 0.5      | $R_-$            | cons.   | 0.6      | 0.6   | 0.3    | 0.3                  | 229 | 0.770             | 0.000*    | 0.942    | 0.059     | -0.006                 | -0.060                 | -0.025                  | 0.099                  | 0.078                  | 100.0   |
| 0.5      | $R_-$            | cons.   | 0.6      | 0.6   | 0.6    | 0.6                  | 161 | 0.678             | 0.000*    | 0.942    | 0.059     | -0.025                 | -0.063                 | -0.049                  | 0.080                  | 0.077                  | 100.0   |
| 0.5      | $R_-$            | sharp   | 0.4      | 0.4   | 0.3    | 0.3                  | 223 | 0.739             | 0.000*    | 0.947    | 0.402     | 0.007                  | 0.080                  | 0.032                   | -0.102                 | -0.101                 | 100.0   |
| 0.5      | $R_-$            | sharp   | 0.4      | 0.4   | 0.6    | 0.6                  | 150 | 0.647             | 0.000*    | 0.942    | 0.040*    | 0.028                  | 0.081                  | 0.058                   | -0.107                 | -0.107                 | 100.0   |
| 0.5      | $R_-$            | sharp   | 0.4      | 0.4   | 0.8    | 0.8                  | 82  | 0.547             | 0.000*    | 0.934    | 0.000*    | 0.051                  | 0.081                  | 0.070                   | -0.102                 | -0.113                 | 99.9    |
| 0.5      | $R_-$            | sharp   | 0.4      | 0.6   | 0.3    | 0.3                  | 223 | 0.759             | 0.000*    | 0.944    | 0.154     | 0.002                  | 0.011                  | 0.005                   | 0.028                  | -0.013                 | 100.0   |
| 0.5      | $R_-$            | sharp   | 0.4      | 0.6   | 0.6    | 0.6                  | 150 | 0.651             | 0.000*    | 0.942    | 0.040*    | 0.003                  | 0.012                  | 0.008                   | -0.009                 | -0.011                 | 100.0   |
| 0.5      | $R_-$            | sharp   | 0.4      | 0.6   | 0.8    | 0.8                  | 82  | 0.566             | 0.000*    | 0.940    | 0.011*    | 0.006                  | 0.010                  | 0.009                   | 0.002                  | -0.011                 | 99.9    |
| 0.5      | $R_-$            | sharp   | 0.6      | 0.4   | 0.3    | 0.3                  | 223 | 0.747             | 0.000*    | 0.946    | 0.315     | 0.001                  | 0.013                  | 0.004                   | -0.045                 | -0.027                 | 100.0   |
| 0.5      | $R_-$            | sharp   | 0.6      | 0.4   | 0.6    | 0.6                  | 150 | 0.634             | 0.000*    | 0.940    | 0.012*    | 0.004                  | 0.014                  | 0.008                   | -0.034                 | -0.014                 | 100.0   |
| 0.5      | $R_-$            | sharp   | 0.6      | 0.6   | 0.3    | 0.3                  | 223 | 0.765             | 0.000*    | 0.947    | 0.451     | -0.005                 | -0.058                 | -0.024                  | 0.067                  | 0.085                  | 100.0   |
| 0.5      | $R_-$            | sharp   | 0.6      | 0.6   | 0.6    | 0.6                  | 150 | 0.652             | 0.000*    | 0.941    | 0.026*    | -0.024                 | -0.063                 | -0.046                  | 0.080                  | 0.086                  | 100.0   |
| 0.5      | $R_{\perp\perp}$ | cons.   | 0.4      | 0.4   | 0.0    | 0.0                  | 252 | 0.799             | 0.453     | 0.953    | 0.476     | 0.002                  | 0.001                  | -0.003                  | -7.229                 | 2.731                  | 100.0   |
| 0.5      | $R_{\perp\perp}$ | cons.   | 0.4      | 0.4   | 0.3    | 0.3                  | 229 | 0.768             | 0.000*    | 0.948    | 0.557     | -0.002                 | 0.003                  | -0.003                  | -0.017                 | 0.010                  | 100.0   |
| 0.5      | $R_{\perp\perp}$ | cons.   | 0.4      | 0.4   | 0.6    | 0.6                  | 161 | 0.705             | 0.000*    | 0.948    | 0.615     | -0.001                 | 0.004                  | -0.000                  | -0.003                 | 0.002                  | 100.0   |
| 0.5      | $R_{\perp\perp}$ | cons.   | 0.4      | 0.4   | 0.8    | 0.8                  | 91  | 0.643             | 0.000*    | 0.945    | 0.180     | -0.003                 | 0.003                  | -0.001                  | 0.005                  | 0.005                  | 100.0   |
| 0.5      | $R_{\perp\perp}$ | cons.   | 0.4      | 0.6   | 0.0    | 0.0                  | 252 | 0.804             | 0.730     | 0.944    | 0.154     | 0.003                  | 0.002                  | -0.002                  | 3.037                  | 0.143                  | 100.0   |
| 0.5      | $R_{\perp\perp}$ | cons.   | 0.4      | 0.6   | 0.3    | 0.3                  | 229 | 0.768             | 0.000*    | 0.945    | 0.241     | 0.002                  | -0.002                 | 0.003                   | 0.029                  | -0.001                 | 100.0   |
| 0.5      | $R_{\perp\perp}$ | cons.   | 0.4      | 0.6   | 0.6    | 0.6                  | 161 | 0.704             | 0.000*    | 0.944    | 0.154     | 0.004                  | 0.003                  | 0.005                   | -0.012                 | -0.009                 | 100.0   |
| 0.5      | $R_{\perp\perp}$ | cons.   | 0.4      | 0.6   | 0.8    | 0.8                  | 91  | 0.659             | 0.000*    | 0.936    | 0.001*    | -0.006                 | -0.006                 | -0.006                  | -0.000                 | -0.002                 | 100.0   |
| 0.5      | $R_{\perp\perp}$ | cons.   | 0.6      | 0.4   | 0.0    | 0.0                  | 252 | 0.795             | 0.239     | 0.937    | 0.001*    | -0.003                 | -0.002                 | 0.002                   | -7.906                 | 1.927                  | 100.0   |
| 0.5      | $R_{\perp\perp}$ | cons.   | 0.6      | 0.4   | 0.3    | 0.3                  | 229 | 0.770             | 0.000*    | 0.941    | 0.033*    | -0.002                 | 0.002                  | -0.003                  | -0.034                 | 0.017                  | 100.0   |
| 0.5      | $R_{\perp\perp}$ | cons.   | 0.6      | 0.4   | 0.6    | 0.6                  | 161 | 0.710             | 0.000*    | 0.944    | 0.154     | -0.004                 | -0.003                 | -0.005                  | -0.012                 | -0.009                 | 100.0   |
| 0.5      | $R_{\perp\perp}$ | cons.   | 0.6      | 0.4   | 0.8    | 0.8                  | 91  | 0.667             | 0.000*    | 0.940    | 0.017*    | 0.006                  | 0.006                  | 0.006                   | 0.005                  | 0.006                  | 100.0   |

Continued on next page

Additional simulation results for design I when working assumption A2 is violated: the true within-person correlation structure is AR(1) with correlation  $\rho$

| $\delta$ | Response         | Formula | $r_{-1}$ | $r_1$ | $\rho$ | $\rho_{\text{size}}$ | $n$ | $1 - \hat{\beta}$ | $p$ value | Coverage | $p$ value | $\text{Cor}(R, Y_0^2)$ | $\text{Cor}(R, Y_1^2)$ | $\text{Cor}(R, Y_0Y_1)$ | $\text{Cov}(Y_0, Y_2)$ | $\text{Cov}(Y_1, Y_2)$ | % Valid |
|----------|------------------|---------|----------|-------|--------|----------------------|-----|-------------------|-----------|----------|-----------|------------------------|------------------------|-------------------------|------------------------|------------------------|---------|
| 0.5      | $R_{\perp\perp}$ | cons.   | 0.6      | 0.6   | 0.0    | 0.0                  | 252 | 0.796             | 0.283     | 0.941    | 0.026*    | -0.002                 | -0.001                 | 0.003                   | 110.092                | -0.705                 | 100.0   |
| 0.5      | $R_{\perp\perp}$ | cons.   | 0.6      | 0.6   | 0.3    | 0.3                  | 229 | 0.774             | 0.000*    | 0.949    | 0.737     | 0.002                  | -0.003                 | 0.003                   | 0.094                  | 0.014                  | 100.0   |
| 0.5      | $R_{\perp\perp}$ | cons.   | 0.6      | 0.6   | 0.6    | 0.6                  | 161 | 0.707             | 0.000*    | 0.951    | 0.900     | 0.001                  | -0.004                 | 0.000                   | -0.009                 | -0.007                 | 100.0   |
| 0.5      | $R_{\perp\perp}$ | cons.   | 0.6      | 0.6   | 0.8    | 0.8                  | 91  | 0.667             | 0.000*    | 0.935    | 0.000*    | 0.003                  | -0.003                 | 0.001                   | -0.006                 | -0.009                 | 100.0   |
| 0.5      | $R_{\perp\perp}$ | sharp   | 0.4      | 0.4   | 0.3    | 0.3                  | 223 | 0.763             | 0.000*    | 0.945    | 0.241     | -0.004                 | -0.001                 | -0.002                  | -0.069                 | -0.012                 | 100.0   |
| 0.5      | $R_{\perp\perp}$ | sharp   | 0.4      | 0.4   | 0.6    | 0.6                  | 150 | 0.656             | 0.000*    | 0.938    | 0.003*    | 0.001                  | 0.002                  | 0.001                   | 0.004                  | 0.001                  | 100.0   |
| 0.5      | $R_{\perp\perp}$ | sharp   | 0.4      | 0.4   | 0.8    | 0.8                  | 82  | 0.619             | 0.000*    | 0.938    | 0.004*    | 0.002                  | 0.002                  | 0.002                   | -0.004                 | -0.002                 | 100.0   |
| 0.5      | $R_{\perp\perp}$ | sharp   | 0.4      | 0.6   | 0.3    | 0.3                  | 223 | 0.773             | 0.000*    | 0.947    | 0.503     | -0.001                 | -0.003                 | 0.002                   | -0.024                 | -0.016                 | 100.0   |
| 0.5      | $R_{\perp\perp}$ | sharp   | 0.4      | 0.6   | 0.6    | 0.6                  | 150 | 0.685             | 0.000*    | 0.953    | 0.476     | -0.003                 | 0.002                  | -0.001                  | -0.013                 | 0.000                  | 100.0   |
| 0.5      | $R_{\perp\perp}$ | sharp   | 0.4      | 0.6   | 0.8    | 0.8                  | 82  | 0.619             | 0.000*    | 0.937    | 0.002*    | -0.002                 | 0.003                  | 0.002                   | 0.012                  | 0.014                  | 100.0   |
| 0.5      | $R_{\perp\perp}$ | sharp   | 0.6      | 0.4   | 0.3    | 0.3                  | 223 | 0.768             | 0.000*    | 0.949    | 0.801     | 0.001                  | 0.003                  | -0.002                  | -0.049                 | -0.003                 | 100.0   |
| 0.5      | $R_{\perp\perp}$ | sharp   | 0.6      | 0.4   | 0.6    | 0.6                  | 150 | 0.680             | 0.000*    | 0.939    | 0.007*    | 0.003                  | -0.002                 | 0.001                   | 0.001                  | -0.001                 | 100.0   |
| 0.5      | $R_{\perp\perp}$ | sharp   | 0.6      | 0.4   | 0.8    | 0.8                  | 82  | 0.617             | 0.000*    | 0.932    | 0.000*    | 0.002                  | -0.003                 | -0.002                  | -0.013                 | -0.011                 | 99.9    |
| 0.5      | $R_{\perp\perp}$ | sharp   | 0.6      | 0.6   | 0.3    | 0.3                  | 223 | 0.776             | 0.001*    | 0.949    | 0.801     | 0.004                  | 0.001                  | 0.002                   | 0.008                  | -0.006                 | 100.0   |
| 0.5      | $R_{\perp\perp}$ | sharp   | 0.6      | 0.6   | 0.6    | 0.6                  | 150 | 0.690             | 0.000*    | 0.944    | 0.132     | -0.001                 | -0.002                 | -0.001                  | 0.006                  | 0.005                  | 100.0   |
| 0.5      | $R_{\perp\perp}$ | sharp   | 0.6      | 0.6   | 0.8    | 0.8                  | 82  | 0.616             | 0.000*    | 0.932    | 0.000*    | -0.002                 | -0.002                 | -0.002                  | 0.008                  | 0.013                  | 100.0   |

## S7.2 Additional Simulations for Design II

**Table S9:** Additional simulation results for design II when working assumptions A1 and A2 are satisfied

| $\delta$ | Response | Formula | $r_{-1}$ | $r_1$ | $\rho$ | $\rho_{\text{size}}$ | $n$ | $1 - \hat{\beta}$ | $p$ value | Coverage | $p$ value | $\text{Cor}(R, Y_0^2)$ | $\text{Cor}(R, Y_1^2)$ | $\text{Cor}(R, Y_0 Y_1)$ | $\text{Cov}(Y_0, Y_2)$ | $\text{Cov}(Y_1, Y_2)$ | % Valid |
|----------|----------|---------|----------|-------|--------|----------------------|-----|-------------------|-----------|----------|-----------|------------------------|------------------------|--------------------------|------------------------|------------------------|---------|
| 0.3      | $R_+$    | cons.   | 0.4      | 0.4   | 0.0    | 0.0                  | 559 | 0.801             | 0.580     | 0.955    | 0.194     | -0.001                 | 0.079                  | 0.001                    | 1.057                  | -0.615                 | 100.0   |
| 0.3      | $R_+$    | cons.   | 0.4      | 0.4   | 0.3    | 0.3                  | 508 | 0.813             | 0.961     | 0.950    | 0.933     | 0.007                  | 0.078                  | 0.031                    | -0.031                 | -0.099                 | 100.0   |
| 0.3      | $R_+$    | cons.   | 0.4      | 0.4   | 0.6    | 0.6                  | 358 | 0.819             | 0.997     | 0.947    | 0.451     | 0.028                  | 0.078                  | 0.057                    | -0.045                 | -0.097                 | 100.0   |
| 0.3      | $R_+$    | cons.   | 0.4      | 0.4   | 0.8    | 0.8                  | 201 | 0.814             | 0.975     | 0.952    | 0.586     | 0.051                  | 0.079                  | 0.070                    | -0.074                 | -0.101                 | 100.0   |
| 0.3      | $R_+$    | cons.   | 0.4      | 0.6   | 0.0    | 0.0                  | 524 | 0.813             | 0.961     | 0.945    | 0.209     | 0.001                  | 0.010                  | 0.002                    | -1.033                 | -6.739                 | 100.0   |
| 0.3      | $R_+$    | cons.   | 0.4      | 0.6   | 0.3    | 0.3                  | 477 | 0.811             | 0.938     | 0.950    | 1.000     | -0.001                 | 0.010                  | 0.005                    | -0.004                 | -0.007                 | 100.0   |
| 0.3      | $R_+$    | cons.   | 0.4      | 0.6   | 0.6    | 0.6                  | 335 | 0.839             | 1.000     | 0.955    | 0.224     | 0.003                  | 0.009                  | 0.006                    | -0.008                 | -0.013                 | 100.0   |
| 0.3      | $R_+$    | cons.   | 0.6      | 0.4   | 0.0    | 0.0                  | 524 | 0.797             | 0.331     | 0.955    | 0.224     | -0.002                 | 0.010                  | 0.001                    | 0.745                  | 2.258                  | 100.0   |
| 0.3      | $R_+$    | cons.   | 0.6      | 0.4   | 0.3    | 0.3                  | 477 | 0.809             | 0.887     | 0.949    | 0.737     | 0.003                  | 0.012                  | 0.004                    | -0.001                 | -0.015                 | 100.0   |
| 0.3      | $R_+$    | cons.   | 0.6      | 0.4   | 0.6    | 0.6                  | 335 | 0.819             | 0.996     | 0.949    | 0.867     | 0.002                  | 0.009                  | 0.006                    | -0.006                 | -0.009                 | 100.0   |
| 0.3      | $R_+$    | cons.   | 0.6      | 0.6   | 0.0    | 0.0                  | 489 | 0.796             | 0.315     | 0.951    | 0.769     | 0.001                  | -0.059                 | 0.002                    | 1.300                  | -3.495                 | 100.0   |
| 0.3      | $R_+$    | cons.   | 0.6      | 0.6   | 0.3    | 0.3                  | 445 | 0.804             | 0.715     | 0.936    | 0.000*    | -0.006                 | -0.061                 | -0.026                   | 0.016                  | 0.080                  | 100.0   |
| 0.3      | $R_+$    | cons.   | 0.6      | 0.6   | 0.6    | 0.6                  | 313 | 0.831             | 1.000     | 0.951    | 0.834     | -0.024                 | -0.059                 | -0.045                   | 0.042                  | 0.085                  | 100.0   |
| 0.3      | $R_+$    | sharp   | 0.4      | 0.4   | 0.3    | 0.3                  | 498 | 0.809             | 0.887     | 0.951    | 0.769     | 0.007                  | 0.081                  | 0.032                    | -0.021                 | -0.100                 | 100.0   |
| 0.3      | $R_+$    | sharp   | 0.4      | 0.4   | 0.6    | 0.6                  | 339 | 0.811             | 0.938     | 0.951    | 0.900     | 0.029                  | 0.082                  | 0.059                    | -0.046                 | -0.095                 | 100.0   |
| 0.3      | $R_+$    | sharp   | 0.4      | 0.4   | 0.8    | 0.8                  | 187 | 0.794             | 0.225     | 0.944    | 0.154     | 0.050                  | 0.079                  | 0.069                    | -0.076                 | -0.103                 | 100.0   |
| 0.3      | $R_+$    | sharp   | 0.4      | 0.6   | 0.3    | 0.3                  | 468 | 0.818             | 0.995     | 0.949    | 0.801     | 0.002                  | 0.012                  | 0.004                    | 0.005                  | -0.008                 | 100.0   |
| 0.3      | $R_+$    | sharp   | 0.4      | 0.6   | 0.6    | 0.6                  | 320 | 0.802             | 0.632     | 0.943    | 0.071     | 0.003                  | 0.010                  | 0.006                    | -0.005                 | -0.011                 | 100.0   |
| 0.3      | $R_+$    | sharp   | 0.6      | 0.4   | 0.3    | 0.3                  | 468 | 0.807             | 0.825     | 0.949    | 0.737     | 0.003                  | 0.011                  | 0.002                    | -0.003                 | -0.017                 | 100.0   |
| 0.3      | $R_+$    | sharp   | 0.6      | 0.4   | 0.6    | 0.6                  | 320 | 0.796             | 0.299     | 0.939    | 0.006*    | 0.004                  | 0.010                  | 0.006                    | -0.006                 | -0.012                 | 100.0   |
| 0.3      | $R_+$    | sharp   | 0.6      | 0.6   | 0.3    | 0.3                  | 438 | 0.814             | 0.975     | 0.948    | 0.675     | -0.006                 | -0.059                 | -0.024                   | 0.031                  | 0.078                  | 100.0   |
| 0.3      | $R_+$    | sharp   | 0.6      | 0.6   | 0.6    | 0.6                  | 301 | 0.829             | 1.000     | 0.953    | 0.530     | -0.022                 | -0.060                 | -0.043                   | 0.043                  | 0.083                  | 100.0   |
| 0.3      | $R_-$    | cons.   | 0.4      | 0.4   | 0.0    | 0.0                  | 559 | 0.808             | 0.869     | 0.952    | 0.586     | -0.001                 | 0.078                  | -0.000                   | -6.889                 | -132.627               | 100.0   |
| 0.3      | $R_-$    | cons.   | 0.4      | 0.4   | 0.3    | 0.3                  | 508 | 0.831             | 1.000     | 0.953    | 0.426     | 0.007                  | 0.077                  | 0.032                    | -0.022                 | -0.090                 | 100.0   |
| 0.3      | $R_-$    | cons.   | 0.4      | 0.4   | 0.6    | 0.6                  | 358 | 0.834             | 1.000     | 0.946    | 0.357     | 0.027                  | 0.078                  | 0.056                    | -0.051                 | -0.100                 | 100.0   |
| 0.3      | $R_-$    | cons.   | 0.4      | 0.4   | 0.8    | 0.8                  | 201 | 0.836             | 1.000     | 0.941    | 0.026*    | 0.051                  | 0.077                  | 0.069                    | -0.079                 | -0.109                 | 100.0   |
| 0.3      | $R_-$    | cons.   | 0.4      | 0.6   | 0.0    | 0.0                  | 524 | 0.799             | 0.435     | 0.940    | 0.017*    | 0.002                  | 0.009                  | -0.001                   | -1.225                 | -1.641                 | 100.0   |
| 0.3      | $R_-$    | cons.   | 0.4      | 0.6   | 0.3    | 0.3                  | 477 | 0.816             | 0.987     | 0.951    | 0.834     | -0.001                 | 0.011                  | 0.004                    | -0.006                 | -0.011                 | 100.0   |
| 0.3      | $R_-$    | cons.   | 0.4      | 0.6   | 0.6    | 0.6                  | 335 | 0.840             | 1.000     | 0.952    | 0.706     | 0.006                  | 0.010                  | 0.008                    | 0.002                  | -0.005                 | 100.0   |
| 0.3      | $R_-$    | cons.   | 0.6      | 0.4   | 0.0    | 0.0                  | 524 | 0.796             | 0.283     | 0.945    | 0.209     | -0.001                 | 0.010                  | -0.002                   | 0.111                  | 1.097                  | 100.0   |
| 0.3      | $R_-$    | cons.   | 0.6      | 0.4   | 0.3    | 0.3                  | 477 | 0.818             | 0.995     | 0.942    | 0.049*    | 0.003                  | 0.011                  | 0.005                    | -0.001                 | -0.001                 | 100.0   |
| 0.3      | $R_-$    | cons.   | 0.6      | 0.4   | 0.6    | 0.6                  | 335 | 0.840             | 1.000     | 0.947    | 0.503     | 0.004                  | 0.011                  | 0.007                    | 0.005                  | -0.004                 | 100.0   |
| 0.3      | $R_-$    | cons.   | 0.6      | 0.6   | 0.0    | 0.0                  | 489 | 0.793             | 0.175     | 0.950    | 0.933     | 0.001                  | -0.061                 | -0.002                   | -1.186                 | 0.992                  | 100.0   |
| 0.3      | $R_-$    | cons.   | 0.6      | 0.6   | 0.3    | 0.3                  | 445 | 0.818             | 0.993     | 0.949    | 0.737     | -0.008                 | -0.060                 | -0.024                   | 0.020                  | 0.087                  | 100.0   |
| 0.3      | $R_-$    | cons.   | 0.6      | 0.6   | 0.6    | 0.6                  | 313 | 0.844             | 1.000     | 0.943    | 0.086     | -0.022                 | -0.063                 | -0.046                   | 0.041                  | 0.071                  | 100.0   |
| 0.3      | $R_-$    | sharp   | 0.4      | 0.4   | 0.3    | 0.3                  | 498 | 0.813             | 0.965     | 0.950    | 0.933     | 0.008                  | 0.076                  | 0.032                    | -0.023                 | -0.094                 | 100.0   |
| 0.3      | $R_-$    | sharp   | 0.4      | 0.4   | 0.6    | 0.6                  | 339 | 0.801             | 0.562     | 0.947    | 0.451     | 0.027                  | 0.077                  | 0.055                    | -0.058                 | -0.106                 | 100.0   |
| 0.3      | $R_-$    | sharp   | 0.4      | 0.4   | 0.8    | 0.8                  | 187 | 0.816             | 0.987     | 0.940    | 0.012*    | 0.049                  | 0.077                  | 0.068                    | -0.071                 | -0.098                 | 100.0   |
| 0.3      | $R_-$    | sharp   | 0.4      | 0.6   | 0.3    | 0.3                  | 468 | 0.809             | 0.896     | 0.944    | 0.132     | 0.002                  | 0.010                  | 0.006                    | -0.003                 | -0.001                 | 100.0   |
| 0.3      | $R_-$    | sharp   | 0.4      | 0.6   | 0.6    | 0.6                  | 320 | 0.806             | 0.800     | 0.949    | 0.801     | 0.004                  | 0.010                  | 0.007                    | -0.001                 | 0.001                  | 100.0   |
| 0.3      | $R_-$    | sharp   | 0.6      | 0.4   | 0.3    | 0.3                  | 468 | 0.812             | 0.953     | 0.946    | 0.315     | 0.003                  | 0.010                  | 0.007                    | -0.003                 | -0.005                 | 100.0   |
| 0.3      | $R_-$    | sharp   | 0.6      | 0.4   | 0.6    | 0.6                  | 320 | 0.815             | 0.980     | 0.940    | 0.013*    | 0.004                  | 0.011                  | 0.007                    | -0.004                 | -0.006                 | 100.0   |
| 0.3      | $R_-$    | sharp   | 0.6      | 0.6   | 0.3    | 0.3                  | 438 | 0.803             | 0.666     | 0.946    | 0.276     | -0.005                 | -0.059                 | -0.024                   | 0.022                  | 0.080                  | 100.0   |
| 0.3      | $R_-$    | sharp   | 0.6      | 0.6   | 0.6    | 0.6                  | 301 | 0.831             | 1.000     | 0.944    | 0.132     | -0.024                 | -0.063                 | -0.046                   | 0.040                  | 0.080                  | 100.0   |

Continued on next page

Additional simulation results for design II when working assumptions A1 and A2 are satisfied

| $\delta$ | Response         | Formula | $r_{-1}$ | $r_1$ | $\rho$ | $\rho_{\text{size}}$ | $n$ | $1 - \hat{\beta}$ | $p$ value | Coverage | $p$ value | $\text{Cor}(R, Y_0^2)$ | $\text{Cor}(R, Y_1^2)$ | $\text{Cor}(R, Y_0Y_1)$ | $\text{Cov}(Y_0, Y_2)$ | $\text{Cov}(Y_1, Y_2)$ | % Valid |
|----------|------------------|---------|----------|-------|--------|----------------------|-----|-------------------|-----------|----------|-----------|------------------------|------------------------|-------------------------|------------------------|------------------------|---------|
| 0.3      | $R_{\perp\perp}$ | cons.   | 0.4      | 0.4   | 0.0    | 0.0                  | 559 | 0.801             | 0.562     | 0.941    | 0.021*    | -0.002                 | 0.000                  | -0.002                  | 5.995                  | -2.940                 | 100.0   |
| 0.3      | $R_{\perp\perp}$ | cons.   | 0.4      | 0.4   | 0.3    | 0.3                  | 508 | 0.804             | 0.715     | 0.951    | 0.769     | 0.000                  | -0.002                 | -0.001                  | -0.010                 | -0.007                 | 100.0   |
| 0.3      | $R_{\perp\perp}$ | cons.   | 0.4      | 0.4   | 0.6    | 0.6                  | 358 | 0.817             | 0.992     | 0.946    | 0.357     | 0.003                  | 0.002                  | 0.002                   | 0.006                  | 0.004                  | 100.0   |
| 0.3      | $R_{\perp\perp}$ | cons.   | 0.4      | 0.4   | 0.8    | 0.8                  | 201 | 0.836             | 1.000     | 0.948    | 0.557     | -0.002                 | -0.002                 | -0.002                  | -0.000                 | 0.000                  | 100.0   |
| 0.3      | $R_{\perp\perp}$ | cons.   | 0.4      | 0.6   | 0.0    | 0.0                  | 524 | 0.806             | 0.787     | 0.943    | 0.071     | 0.002                  | -0.001                 | 0.000                   | -9.908                 | -3.397                 | 100.0   |
| 0.3      | $R_{\perp\perp}$ | cons.   | 0.4      | 0.6   | 0.3    | 0.3                  | 477 | 0.807             | 0.825     | 0.948    | 0.615     | 0.000                  | -0.003                 | -0.001                  | -0.001                 | -0.004                 | 100.0   |
| 0.3      | $R_{\perp\perp}$ | cons.   | 0.4      | 0.6   | 0.6    | 0.6                  | 335 | 0.833             | 1.000     | 0.960    | 0.015*    | -0.001                 | -0.001                 | -0.000                  | -0.001                 | -0.003                 | 100.0   |
| 0.3      | $R_{\perp\perp}$ | cons.   | 0.4      | 0.6   | 0.8    | 0.8                  | 189 | 0.840             | 1.000     | 0.949    | 0.801     | 0.002                  | 0.001                  | 0.001                   | 0.001                  | -0.002                 | 100.0   |
| 0.3      | $R_{\perp\perp}$ | cons.   | 0.6      | 0.4   | 0.0    | 0.0                  | 524 | 0.794             | 0.212     | 0.957    | 0.079     | -0.002                 | 0.001                  | -0.000                  | 3.552                  | -0.370                 | 100.0   |
| 0.3      | $R_{\perp\perp}$ | cons.   | 0.6      | 0.4   | 0.3    | 0.3                  | 477 | 0.805             | 0.774     | 0.948    | 0.615     | -0.000                 | 0.003                  | 0.001                   | -0.005                 | -0.002                 | 100.0   |
| 0.3      | $R_{\perp\perp}$ | cons.   | 0.6      | 0.4   | 0.6    | 0.6                  | 335 | 0.817             | 0.991     | 0.953    | 0.426     | 0.001                  | 0.001                  | 0.000                   | 0.005                  | 0.004                  | 100.0   |
| 0.3      | $R_{\perp\perp}$ | cons.   | 0.6      | 0.4   | 0.8    | 0.8                  | 189 | 0.836             | 1.000     | 0.939    | 0.007*    | -0.002                 | -0.001                 | -0.001                  | 0.000                  | 0.001                  | 100.0   |
| 0.3      | $R_{\perp\perp}$ | cons.   | 0.6      | 0.6   | 0.0    | 0.0                  | 489 | 0.804             | 0.715     | 0.952    | 0.645     | 0.002                  | 0.002                  | -0.002                  | -0.609                 | -1.578                 | 100.0   |
| 0.3      | $R_{\perp\perp}$ | cons.   | 0.6      | 0.6   | 0.3    | 0.3                  | 445 | 0.797             | 0.365     | 0.937    | 0.002*    | 0.001                  | -0.001                 | 0.002                   | 0.002                  | 0.003                  | 100.0   |
| 0.3      | $R_{\perp\perp}$ | cons.   | 0.6      | 0.6   | 0.6    | 0.6                  | 313 | 0.824             | 1.000     | 0.944    | 0.154     | 0.001                  | 0.003                  | 0.002                   | -0.001                 | 0.002                  | 100.0   |
| 0.3      | $R_{\perp\perp}$ | cons.   | 0.6      | 0.6   | 0.8    | 0.8                  | 176 | 0.845             | 1.000     | 0.944    | 0.132     | 0.002                  | -0.001                 | 0.001                   | -0.000                 | -0.002                 | 100.0   |
| 0.3      | $R_{\perp\perp}$ | sharp   | 0.4      | 0.4   | 0.3    | 0.3                  | 498 | 0.803             | 0.666     | 0.949    | 0.867     | -0.001                 | 0.002                  | -0.001                  | -0.001                 | -0.006                 | 100.0   |
| 0.3      | $R_{\perp\perp}$ | sharp   | 0.4      | 0.4   | 0.6    | 0.6                  | 339 | 0.805             | 0.745     | 0.946    | 0.357     | -0.002                 | -0.003                 | -0.002                  | 0.000                  | -0.006                 | 100.0   |
| 0.3      | $R_{\perp\perp}$ | sharp   | 0.4      | 0.4   | 0.8    | 0.8                  | 187 | 0.812             | 0.957     | 0.951    | 0.900     | -0.003                 | -0.001                 | -0.001                  | -0.001                 | 0.001                  | 100.0   |
| 0.3      | $R_{\perp\perp}$ | sharp   | 0.4      | 0.6   | 0.3    | 0.3                  | 468 | 0.813             | 0.969     | 0.945    | 0.180     | -0.000                 | -0.001                 | -0.002                  | -0.011                 | 0.000                  | 100.0   |
| 0.3      | $R_{\perp\perp}$ | sharp   | 0.4      | 0.6   | 0.6    | 0.6                  | 320 | 0.802             | 0.597     | 0.949    | 0.867     | -0.003                 | -0.001                 | -0.001                  | -0.001                 | -0.005                 | 100.0   |
| 0.3      | $R_{\perp\perp}$ | sharp   | 0.4      | 0.6   | 0.8    | 0.8                  | 176 | 0.816             | 0.989     | 0.947    | 0.451     | -0.001                 | -0.002                 | -0.002                  | 0.002                  | -0.000                 | 100.0   |
| 0.3      | $R_{\perp\perp}$ | sharp   | 0.6      | 0.4   | 0.3    | 0.3                  | 468 | 0.801             | 0.580     | 0.944    | 0.132     | 0.000                  | 0.001                  | 0.002                   | 0.001                  | -0.002                 | 100.0   |
| 0.3      | $R_{\perp\perp}$ | sharp   | 0.6      | 0.4   | 0.6    | 0.6                  | 320 | 0.793             | 0.186     | 0.948    | 0.557     | 0.003                  | 0.001                  | 0.001                   | 0.003                  | 0.004                  | 100.0   |
| 0.3      | $R_{\perp\perp}$ | sharp   | 0.6      | 0.4   | 0.8    | 0.8                  | 176 | 0.804             | 0.715     | 0.944    | 0.154     | 0.001                  | 0.002                  | 0.002                   | -0.002                 | -0.000                 | 100.0   |
| 0.3      | $R_{\perp\perp}$ | sharp   | 0.6      | 0.6   | 0.3    | 0.3                  | 438 | 0.803             | 0.666     | 0.949    | 0.867     | 0.001                  | 0.002                  | -0.002                  | 0.002                  | -0.004                 | 100.0   |
| 0.3      | $R_{\perp\perp}$ | sharp   | 0.6      | 0.6   | 0.6    | 0.6                  | 301 | 0.800             | 0.507     | 0.943    | 0.086     | 0.002                  | 0.002                  | 0.002                   | 0.004                  | 0.007                  | 100.0   |
| 0.3      | $R_{\perp\perp}$ | sharp   | 0.6      | 0.6   | 0.8    | 0.8                  | 166 | 0.819             | 0.996     | 0.949    | 0.737     | 0.002                  | 0.002                  | 0.002                   | -0.000                 | 0.001                  | 100.0   |
| 0.5      | $R_+$            | cons.   | 0.4      | 0.4   | 0.0    | 0.0                  | 201 | 0.800             | 0.525     | 0.942    | 0.059     | -0.002                 | 0.079                  | 0.001                   | -0.312                 | -0.007                 | 100.0   |
| 0.5      | $R_+$            | cons.   | 0.4      | 0.4   | 0.3    | 0.3                  | 183 | 0.800             | 0.525     | 0.942    | 0.059     | 0.009                  | 0.077                  | 0.033                   | -0.020                 | -0.082                 | 100.0   |
| 0.5      | $R_+$            | cons.   | 0.4      | 0.4   | 0.6    | 0.6                  | 129 | 0.828             | 1.000     | 0.943    | 0.071     | 0.028                  | 0.082                  | 0.058                   | -0.059                 | -0.095                 | 100.0   |
| 0.5      | $R_+$            | cons.   | 0.4      | 0.4   | 0.8    | 0.8                  | 73  | 0.841             | 1.000     | 0.928    | 0.000*    | 0.050                  | 0.077                  | 0.068                   | -0.080                 | -0.112                 | 100.0   |
| 0.5      | $R_+$            | cons.   | 0.4      | 0.6   | 0.0    | 0.0                  | 189 | 0.802             | 0.597     | 0.936    | 0.000*    | 0.002                  | 0.009                  | -0.003                  | -0.029                 | -1.744                 | 100.0   |
| 0.5      | $R_+$            | cons.   | 0.4      | 0.6   | 0.3    | 0.3                  | 172 | 0.809             | 0.887     | 0.943    | 0.086     | 0.001                  | 0.013                  | 0.004                   | 0.001                  | -0.027                 | 100.0   |
| 0.5      | $R_+$            | cons.   | 0.4      | 0.6   | 0.6    | 0.6                  | 121 | 0.831             | 1.000     | 0.940    | 0.017*    | 0.004                  | 0.010                  | 0.007                   | -0.004                 | -0.013                 | 100.0   |
| 0.5      | $R_+$            | cons.   | 0.6      | 0.4   | 0.0    | 0.0                  | 189 | 0.800             | 0.489     | 0.946    | 0.276     | -0.002                 | 0.010                  | -0.002                  | -1.141                 | 1.114                  | 100.0   |
| 0.5      | $R_+$            | cons.   | 0.6      | 0.4   | 0.3    | 0.3                  | 172 | 0.812             | 0.953     | 0.946    | 0.315     | 0.002                  | 0.014                  | 0.006                   | 0.000                  | 0.012                  | 100.0   |
| 0.5      | $R_+$            | cons.   | 0.6      | 0.4   | 0.6    | 0.6                  | 121 | 0.825             | 1.000     | 0.939    | 0.006*    | 0.004                  | 0.008                  | 0.007                   | 0.004                  | -0.011                 | 100.0   |
| 0.5      | $R_+$            | cons.   | 0.6      | 0.6   | 0.0    | 0.0                  | 176 | 0.799             | 0.453     | 0.946    | 0.357     | -0.003                 | -0.060                 | -0.003                  | -1.694                 | -1.570                 | 100.0   |
| 0.5      | $R_+$            | cons.   | 0.6      | 0.6   | 0.3    | 0.3                  | 160 | 0.815             | 0.980     | 0.945    | 0.209     | -0.005                 | -0.061                 | -0.024                  | 0.016                  | 0.085                  | 100.0   |
| 0.5      | $R_+$            | cons.   | 0.6      | 0.6   | 0.6    | 0.6                  | 113 | 0.830             | 1.000     | 0.943    | 0.086     | -0.027                 | -0.070                 | -0.051                  | 0.032                  | 0.065                  | 100.0   |
| 0.5      | $R_+$            | sharp   | 0.4      | 0.4   | 0.3    | 0.3                  | 180 | 0.801             | 0.562     | 0.941    | 0.033*    | 0.010                  | 0.082                  | 0.033                   | -0.044                 | -0.108                 | 100.0   |
| 0.5      | $R_+$            | sharp   | 0.4      | 0.4   | 0.6    | 0.6                  | 122 | 0.804             | 0.715     | 0.940    | 0.013*    | 0.032                  | 0.080                  | 0.058                   | -0.053                 | -0.103                 | 100.0   |
| 0.5      | $R_+$            | sharp   | 0.4      | 0.4   | 0.8    | 0.8                  | 67  | 0.788             | 0.058     | 0.932    | 0.000*    | 0.053                  | 0.083                  | 0.072                   | -0.062                 | -0.096                 | 100.0   |
| 0.5      | $R_+$            | sharp   | 0.4      | 0.6   | 0.3    | 0.3                  | 169 | 0.813             | 0.961     | 0.939    | 0.009*    | 0.007                  | 0.008                  | 0.003                   | -0.002                 | 0.008                  | 100.0   |
| 0.5      | $R_+$            | sharp   | 0.4      | 0.6   | 0.6    | 0.6                  | 115 | 0.828             | 1.000     | 0.937    | 0.002*    | 0.006                  | 0.012                  | 0.008                   | -0.003                 | -0.014                 | 100.0   |
| 0.5      | $R_+$            | sharp   | 0.6      | 0.4   | 0.3    | 0.3                  | 169 | 0.813             | 0.961     | 0.937    | 0.001*    | 0.002                  | 0.010                  | 0.005                   | 0.017                  | 0.007                  | 100.0   |

Continued on next page



Additional simulation results for design II when working assumptions A1 and A2 are satisfied

| $\delta$ | Response         | Formula | $r_{-1}$ | $r_1$ | $\rho$ | $\rho_{\text{size}}$ | $n$ | $1 - \hat{\beta}$ | $p$ value | Coverage | $p$ value | $\text{Cor}(R, Y_0^2)$ | $\text{Cor}(R, Y_1^2)$ | $\text{Cor}(R, Y_0Y_1)$ | $\text{Cov}(Y_0, Y_2)$ | $\text{Cov}(Y_1, Y_2)$ | % Valid |
|----------|------------------|---------|----------|-------|--------|----------------------|-----|-------------------|-----------|----------|-----------|------------------------|------------------------|-------------------------|------------------------|------------------------|---------|
| 0.5      | $R_+$            | sharp   | 0.6      | 0.4   | 0.6    | 0.6                  | 115 | 0.809             | 0.904     | 0.938    | 0.004*    | 0.006                  | 0.009                  | 0.007                   | -0.006                 | -0.010                 | 100.0   |
| 0.5      | $R_+$            | sharp   | 0.6      | 0.6   | 0.3    | 0.3                  | 158 | 0.806             | 0.787     | 0.945    | 0.241     | -0.005                 | -0.059                 | -0.023                  | 0.037                  | 0.096                  | 100.0   |
| 0.5      | $R_+$            | sharp   | 0.6      | 0.6   | 0.6    | 0.6                  | 109 | 0.823             | 0.999     | 0.932    | 0.000*    | -0.025                 | -0.060                 | -0.046                  | 0.042                  | 0.082                  | 100.0   |
| 0.5      | $R_-$            | cons.   | 0.4      | 0.4   | 0.0    | 0.0                  | 201 | 0.802             | 0.632     | 0.950    | 0.967     | 0.002                  | 0.078                  | -0.001                  | -6.314                 | -0.973                 | 100.0   |
| 0.5      | $R_-$            | cons.   | 0.4      | 0.4   | 0.3    | 0.3                  | 183 | 0.819             | 0.995     | 0.939    | 0.006*    | 0.007                  | 0.077                  | 0.031                   | -0.034                 | -0.114                 | 100.0   |
| 0.5      | $R_-$            | cons.   | 0.4      | 0.4   | 0.6    | 0.6                  | 129 | 0.833             | 1.000     | 0.938    | 0.003*    | 0.028                  | 0.078                  | 0.058                   | -0.049                 | -0.103                 | 100.0   |
| 0.5      | $R_-$            | cons.   | 0.4      | 0.4   | 0.8    | 0.8                  | 73  | 0.852             | 1.000     | 0.939    | 0.006*    | 0.052                  | 0.084                  | 0.075                   | -0.088                 | -0.112                 | 100.0   |
| 0.5      | $R_-$            | cons.   | 0.4      | 0.6   | 0.0    | 0.0                  | 189 | 0.808             | 0.878     | 0.938    | 0.004*    | 0.003                  | 0.011                  | 0.002                   | -3.081                 | -1.483                 | 100.0   |
| 0.5      | $R_-$            | cons.   | 0.4      | 0.6   | 0.3    | 0.3                  | 172 | 0.830             | 1.000     | 0.945    | 0.209     | -0.001                 | 0.010                  | 0.005                   | -0.002                 | -0.014                 | 100.0   |
| 0.5      | $R_-$            | cons.   | 0.4      | 0.6   | 0.6    | 0.6                  | 121 | 0.828             | 1.000     | 0.934    | 0.000*    | 0.005                  | 0.011                  | 0.008                   | -0.002                 | -0.013                 | 100.0   |
| 0.5      | $R_-$            | cons.   | 0.6      | 0.4   | 0.0    | 0.0                  | 189 | 0.810             | 0.919     | 0.943    | 0.086     | -0.003                 | 0.011                  | 0.004                   | 0.923                  | -1.917                 | 100.0   |
| 0.5      | $R_-$            | cons.   | 0.6      | 0.4   | 0.3    | 0.3                  | 172 | 0.827             | 1.000     | 0.947    | 0.402     | 0.002                  | 0.013                  | 0.004                   | -0.018                 | -0.001                 | 100.0   |
| 0.5      | $R_-$            | cons.   | 0.6      | 0.4   | 0.6    | 0.6                  | 121 | 0.847             | 1.000     | 0.938    | 0.003*    | 0.007                  | 0.012                  | 0.009                   | 0.001                  | -0.002                 | 100.0   |
| 0.5      | $R_-$            | cons.   | 0.6      | 0.6   | 0.0    | 0.0                  | 176 | 0.796             | 0.283     | 0.943    | 0.086     | -0.005                 | -0.061                 | -0.003                  | -0.924                 | -12.598                | 100.0   |
| 0.5      | $R_-$            | cons.   | 0.6      | 0.6   | 0.3    | 0.3                  | 160 | 0.821             | 0.998     | 0.941    | 0.033*    | -0.006                 | -0.060                 | -0.025                  | 0.025                  | 0.090                  | 100.0   |
| 0.5      | $R_-$            | cons.   | 0.6      | 0.6   | 0.6    | 0.6                  | 113 | 0.837             | 1.000     | 0.943    | 0.086     | -0.022                 | -0.060                 | -0.043                  | 0.047                  | 0.098                  | 100.0   |
| 0.5      | $R_-$            | sharp   | 0.4      | 0.4   | 0.3    | 0.3                  | 180 | 0.800             | 0.525     | 0.940    | 0.013*    | 0.006                  | 0.080                  | 0.035                   | -0.017                 | -0.091                 | 100.0   |
| 0.5      | $R_-$            | sharp   | 0.4      | 0.4   | 0.6    | 0.6                  | 122 | 0.811             | 0.938     | 0.941    | 0.026*    | 0.027                  | 0.078                  | 0.057                   | -0.058                 | -0.100                 | 100.0   |
| 0.5      | $R_-$            | sharp   | 0.4      | 0.4   | 0.8    | 0.8                  | 67  | 0.802             | 0.615     | 0.929    | 0.000*    | 0.053                  | 0.084                  | 0.073                   | -0.087                 | -0.108                 | 100.0   |
| 0.5      | $R_-$            | sharp   | 0.4      | 0.6   | 0.3    | 0.3                  | 169 | 0.808             | 0.878     | 0.939    | 0.007*    | 0.003                  | 0.009                  | 0.003                   | 0.001                  | 0.016                  | 100.0   |
| 0.5      | $R_-$            | sharp   | 0.4      | 0.6   | 0.6    | 0.6                  | 115 | 0.812             | 0.953     | 0.936    | 0.000*    | 0.006                  | 0.011                  | 0.008                   | 0.001                  | -0.006                 | 100.0   |
| 0.5      | $R_-$            | sharp   | 0.6      | 0.4   | 0.3    | 0.3                  | 169 | 0.806             | 0.800     | 0.935    | 0.000*    | -0.005                 | 0.012                  | 0.004                   | -0.008                 | -0.023                 | 100.0   |
| 0.5      | $R_-$            | sharp   | 0.6      | 0.4   | 0.6    | 0.6                  | 115 | 0.824             | 1.000     | 0.941    | 0.033*    | 0.007                  | 0.014                  | 0.010                   | -0.016                 | -0.017                 | 100.0   |
| 0.5      | $R_-$            | sharp   | 0.6      | 0.6   | 0.3    | 0.3                  | 158 | 0.818             | 0.995     | 0.944    | 0.132     | -0.008                 | -0.062                 | -0.026                  | 0.009                  | 0.060                  | 100.0   |
| 0.5      | $R_-$            | sharp   | 0.6      | 0.6   | 0.6    | 0.6                  | 109 | 0.841             | 1.000     | 0.941    | 0.021*    | -0.019                 | -0.059                 | -0.041                  | 0.051                  | 0.082                  | 100.0   |
| 0.5      | $R_{\perp\perp}$ | cons.   | 0.4      | 0.4   | 0.0    | 0.0                  | 201 | 0.801             | 0.580     | 0.951    | 0.834     | -0.002                 | -0.001                 | 0.001                   | 3.545                  | 0.583                  | 100.0   |
| 0.5      | $R_{\perp\perp}$ | cons.   | 0.4      | 0.4   | 0.3    | 0.3                  | 183 | 0.813             | 0.969     | 0.944    | 0.111     | 0.002                  | -0.000                 | 0.003                   | 0.010                  | -0.008                 | 100.0   |
| 0.5      | $R_{\perp\perp}$ | cons.   | 0.4      | 0.4   | 0.6    | 0.6                  | 129 | 0.814             | 0.972     | 0.938    | 0.004*    | -0.001                 | 0.004                  | 0.001                   | 0.011                  | 0.010                  | 100.0   |
| 0.5      | $R_{\perp\perp}$ | cons.   | 0.4      | 0.4   | 0.8    | 0.8                  | 73  | 0.839             | 1.000     | 0.941    | 0.026*    | 0.002                  | 0.005                  | 0.005                   | 0.002                  | -0.001                 | 100.0   |
| 0.5      | $R_{\perp\perp}$ | cons.   | 0.4      | 0.6   | 0.0    | 0.0                  | 189 | 0.816             | 0.987     | 0.946    | 0.357     | 0.002                  | 0.004                  | -0.001                  | -4.920                 | -1.927                 | 100.0   |
| 0.5      | $R_{\perp\perp}$ | cons.   | 0.4      | 0.6   | 0.3    | 0.3                  | 172 | 0.814             | 0.975     | 0.943    | 0.071     | -0.003                 | 0.005                  | 0.002                   | -0.006                 | 0.020                  | 100.0   |
| 0.5      | $R_{\perp\perp}$ | cons.   | 0.4      | 0.6   | 0.6    | 0.6                  | 121 | 0.815             | 0.984     | 0.946    | 0.276     | 0.002                  | 0.003                  | 0.002                   | -0.000                 | 0.002                  | 100.0   |
| 0.5      | $R_{\perp\perp}$ | cons.   | 0.4      | 0.6   | 0.8    | 0.8                  | 68  | 0.838             | 1.000     | 0.935    | 0.000*    | -0.004                 | -0.001                 | -0.002                  | 0.003                  | 0.008                  | 100.0   |
| 0.5      | $R_{\perp\perp}$ | cons.   | 0.6      | 0.4   | 0.0    | 0.0                  | 189 | 0.800             | 0.507     | 0.946    | 0.357     | -0.002                 | -0.004                 | 0.001                   | 1.571                  | -3.074                 | 100.0   |
| 0.5      | $R_{\perp\perp}$ | cons.   | 0.6      | 0.4   | 0.3    | 0.3                  | 172 | 0.813             | 0.965     | 0.950    | 0.933     | 0.003                  | -0.005                 | -0.002                  | -0.001                 | -0.010                 | 100.0   |
| 0.5      | $R_{\perp\perp}$ | cons.   | 0.6      | 0.4   | 0.6    | 0.6                  | 121 | 0.824             | 1.000     | 0.947    | 0.451     | -0.002                 | -0.003                 | -0.002                  | -0.010                 | -0.005                 | 100.0   |
| 0.5      | $R_{\perp\perp}$ | cons.   | 0.6      | 0.4   | 0.8    | 0.8                  | 68  | 0.835             | 1.000     | 0.932    | 0.000*    | 0.004                  | 0.001                  | 0.002                   | 0.025                  | 0.020                  | 99.8    |
| 0.5      | $R_{\perp\perp}$ | cons.   | 0.6      | 0.6   | 0.0    | 0.0                  | 176 | 0.807             | 0.837     | 0.947    | 0.503     | 0.002                  | -0.002                 | -0.002                  | -2.984                 | 12.882                 | 100.0   |
| 0.5      | $R_{\perp\perp}$ | cons.   | 0.6      | 0.6   | 0.3    | 0.3                  | 160 | 0.816             | 0.989     | 0.947    | 0.402     | 0.004                  | -0.002                 | 0.003                   | 0.014                  | 0.012                  | 100.0   |
| 0.5      | $R_{\perp\perp}$ | cons.   | 0.6      | 0.6   | 0.6    | 0.6                  | 113 | 0.829             | 1.000     | 0.929    | 0.000*    | 0.001                  | 0.001                  | -0.000                  | 0.001                  | -0.002                 | 100.0   |
| 0.5      | $R_{\perp\perp}$ | cons.   | 0.6      | 0.6   | 0.8    | 0.8                  | 64  | 0.845             | 1.000     | 0.928    | 0.000*    | -0.002                 | -0.006                 | -0.004                  | 0.031                  | 0.029                  | 99.5    |
| 0.5      | $R_{\perp\perp}$ | sharp   | 0.4      | 0.4   | 0.3    | 0.3                  | 180 | 0.800             | 0.507     | 0.935    | 0.000*    | -0.001                 | -0.003                 | -0.003                  | -0.001                 | -0.023                 | 100.0   |
| 0.5      | $R_{\perp\perp}$ | sharp   | 0.4      | 0.4   | 0.6    | 0.6                  | 122 | 0.807             | 0.848     | 0.947    | 0.451     | -0.002                 | 0.004                  | -0.003                  | 0.000                  | -0.003                 | 100.0   |
| 0.5      | $R_{\perp\perp}$ | sharp   | 0.4      | 0.4   | 0.8    | 0.8                  | 67  | 0.816             | 0.986     | 0.933    | 0.000*    | 0.001                  | 0.003                  | 0.003                   | 0.009                  | 0.013                  | 100.0   |
| 0.5      | $R_{\perp\perp}$ | sharp   | 0.4      | 0.6   | 0.3    | 0.3                  | 169 | 0.789             | 0.076     | 0.942    | 0.040*    | 0.005                  | -0.003                 | -0.002                  | -0.009                 | -0.011                 | 100.0   |
| 0.5      | $R_{\perp\perp}$ | sharp   | 0.4      | 0.6   | 0.6    | 0.6                  | 115 | 0.818             | 0.995     | 0.945    | 0.241     | 0.004                  | -0.001                 | 0.004                   | -0.001                 | 0.004                  | 100.0   |
| 0.5      | $R_{\perp\perp}$ | sharp   | 0.4      | 0.6   | 0.8    | 0.8                  | 64  | 0.824             | 1.000     | 0.938    | 0.004*    | -0.001                 | 0.004                  | 0.003                   | 0.010                  | 0.009                  | 99.7    |

Continued on next page

Additional simulation results for design II when working assumptions A1 and A2 are satisfied

| $\delta$ | Response         | Formula | $r_{-1}$ | $r_1$ | $\rho$ | $\rho_{\text{size}}$ | $n$ | $1 - \hat{\beta}$ | $p$ value | Coverage | $p$ value | $\text{Cor}(R, Y_0^2)$ | $\text{Cor}(R, Y_1^2)$ | $\text{Cor}(R, Y_0 Y_1)$ | $\text{Cov}(Y_0, Y_2)$ | $\text{Cov}(Y_1, Y_2)$ | % Valid |
|----------|------------------|---------|----------|-------|--------|----------------------|-----|-------------------|-----------|----------|-----------|------------------------|------------------------|--------------------------|------------------------|------------------------|---------|
| 0.5      | $R_{\perp\perp}$ | sharp   | 0.6      | 0.4   | 0.3    | 0.3                  | 169 | 0.789             | 0.064     | 0.939    | 0.006*    | -0.005                 | 0.003                  | 0.002                    | 0.001                  | 0.009                  | 100.0   |
| 0.5      | $R_{\perp\perp}$ | sharp   | 0.6      | 0.4   | 0.6    | 0.6                  | 115 | 0.806             | 0.787     | 0.937    | 0.002*    | -0.004                 | 0.001                  | -0.004                   | -0.008                 | -0.008                 | 100.0   |
| 0.5      | $R_{\perp\perp}$ | sharp   | 0.6      | 0.4   | 0.8    | 0.8                  | 64  | 0.817             | 0.992     | 0.932    | 0.000*    | 0.001                  | -0.004                 | -0.002                   | 0.008                  | 0.008                  | 99.9    |
| 0.5      | $R_{\perp\perp}$ | sharp   | 0.6      | 0.6   | 0.3    | 0.3                  | 158 | 0.808             | 0.858     | 0.934    | 0.000*    | -0.000                 | -0.001                 | 0.002                    | -0.001                 | -0.003                 | 100.0   |
| 0.5      | $R_{\perp\perp}$ | sharp   | 0.6      | 0.6   | 0.6    | 0.6                  | 109 | 0.806             | 0.800     | 0.939    | 0.009*    | 0.001                  | 0.007                  | 0.005                    | 0.007                  | 0.015                  | 100.0   |
| 0.5      | $R_{\perp\perp}$ | sharp   | 0.6      | 0.6   | 0.8    | 0.8                  | 60  | 0.831             | 1.000     | 0.936    | 0.001*    | 0.003                  | 0.003                  | 0.002                    | 0.048                  | 0.050                  | 99.3    |

**Table S10:** Additional simulation results for design II when working assumption A1(a) is violated: responders' end-of-study variance is 25% below the appropriate lower bound.

| $\delta$ | Response | Formula | $r_{-1}$ | $r_1$ | $\rho$ | $\rho_{\text{size}}$ | $n$ | $1 - \hat{\beta}$ | $p$ value | Coverage | $p$ value | $\text{Cor}(R, Y_0^2)$ | $\text{Cor}(R, Y_1^2)$ | $\text{Cor}(R, Y_0Y_1)$ | $\text{Cov}(Y_0, Y_2)$ | $\text{Cov}(Y_1, Y_2)$ | % Valid |
|----------|----------|---------|----------|-------|--------|----------------------|-----|-------------------|-----------|----------|-----------|------------------------|------------------------|-------------------------|------------------------|------------------------|---------|
| 0.3      | $R_+$    | cons.   | 0.4      | 0.4   | 0.0    | 0.0                  | 559 | 0.778             | 0.001*    | 0.950    | 0.933     | -0.001                 | 0.078                  | -0.000                  | -4.456                 | -70.580                | 100.0   |
| 0.3      | $R_+$    | cons.   | 0.4      | 0.4   | 0.3    | 0.3                  | 508 | 0.800             | 0.507     | 0.950    | 0.967     | 0.007                  | 0.077                  | 0.032                   | -0.022                 | -0.090                 | 100.0   |
| 0.3      | $R_+$    | cons.   | 0.4      | 0.4   | 0.6    | 0.6                  | 358 | 0.807             | 0.848     | 0.942    | 0.059     | 0.027                  | 0.078                  | 0.056                   | -0.051                 | -0.100                 | 100.0   |
| 0.3      | $R_+$    | cons.   | 0.4      | 0.4   | 0.8    | 0.8                  | 201 | 0.809             | 0.904     | 0.946    | 0.276     | 0.051                  | 0.077                  | 0.069                   | -0.079                 | -0.109                 | 100.0   |
| 0.3      | $R_+$    | cons.   | 0.4      | 0.6   | 0.0    | 0.0                  | 524 | 0.743             | 0.000*    | 0.944    | 0.111     | 0.002                  | 0.009                  | -0.001                  | -1.140                 | -1.411                 | 100.0   |
| 0.3      | $R_+$    | cons.   | 0.4      | 0.6   | 0.3    | 0.3                  | 477 | 0.767             | 0.000*    | 0.952    | 0.645     | -0.001                 | 0.011                  | 0.004                   | -0.006                 | -0.010                 | 100.0   |
| 0.3      | $R_+$    | cons.   | 0.4      | 0.6   | 0.6    | 0.6                  | 335 | 0.802             | 0.597     | 0.950    | 0.967     | 0.006                  | 0.010                  | 0.008                   | 0.002                  | -0.005                 | 100.0   |
| 0.3      | $R_+$    | cons.   | 0.4      | 0.6   | 0.8    | 0.8                  | 189 | 0.780             | 0.003*    | 0.945    | 0.209     | 0.007                  | 0.009                  | 0.009                   | -0.002                 | -0.007                 | 100.0   |
| 0.3      | $R_+$    | cons.   | 0.6      | 0.4   | 0.0    | 0.0                  | 524 | 0.745             | 0.000*    | 0.944    | 0.154     | -0.001                 | 0.010                  | -0.002                  | -0.256                 | 1.061                  | 100.0   |
| 0.3      | $R_+$    | cons.   | 0.6      | 0.4   | 0.3    | 0.3                  | 477 | 0.768             | 0.000*    | 0.939    | 0.009*    | 0.003                  | 0.011                  | 0.005                   | -0.001                 | -0.001                 | 100.0   |
| 0.3      | $R_+$    | cons.   | 0.6      | 0.4   | 0.6    | 0.6                  | 335 | 0.802             | 0.632     | 0.948    | 0.557     | 0.004                  | 0.011                  | 0.007                   | 0.005                  | -0.003                 | 100.0   |
| 0.3      | $R_+$    | cons.   | 0.6      | 0.4   | 0.8    | 0.8                  | 189 | 0.804             | 0.699     | 0.941    | 0.033*    | 0.008                  | 0.011                  | 0.011                   | -0.013                 | -0.017                 | 100.0   |
| 0.3      | $R_+$    | cons.   | 0.6      | 0.6   | 0.0    | 0.0                  | 489 | 0.736             | 0.000*    | 0.950    | 0.967     | 0.001                  | -0.061                 | -0.002                  | -1.115                 | 0.989                  | 100.0   |
| 0.3      | $R_+$    | cons.   | 0.6      | 0.6   | 0.3    | 0.3                  | 445 | 0.758             | 0.000*    | 0.946    | 0.276     | -0.008                 | -0.060                 | -0.024                  | 0.017                  | 0.084                  | 100.0   |
| 0.3      | $R_+$    | cons.   | 0.6      | 0.6   | 0.6    | 0.6                  | 313 | 0.793             | 0.163     | 0.945    | 0.180     | -0.022                 | -0.063                 | -0.046                  | 0.042                  | 0.072                  | 100.0   |
| 0.3      | $R_+$    | cons.   | 0.6      | 0.6   | 0.8    | 0.8                  | 176 | 0.754             | 0.000*    | 0.942    | 0.040*    | -0.039                 | -0.061                 | -0.054                  | 0.063                  | 0.079                  | 100.0   |
| 0.3      | $R_+$    | sharp   | 0.4      | 0.4   | 0.3    | 0.3                  | 498 | 0.777             | 0.001*    | 0.950    | 0.933     | 0.008                  | 0.076                  | 0.032                   | -0.025                 | -0.095                 | 100.0   |
| 0.3      | $R_+$    | sharp   | 0.4      | 0.4   | 0.6    | 0.6                  | 339 | 0.781             | 0.005*    | 0.949    | 0.737     | 0.027                  | 0.077                  | 0.055                   | -0.058                 | -0.106                 | 100.0   |
| 0.3      | $R_+$    | sharp   | 0.4      | 0.4   | 0.8    | 0.8                  | 187 | 0.787             | 0.040*    | 0.935    | 0.000*    | 0.049                  | 0.077                  | 0.068                   | -0.071                 | -0.098                 | 100.0   |
| 0.3      | $R_+$    | sharp   | 0.4      | 0.6   | 0.3    | 0.3                  | 468 | 0.771             | 0.000*    | 0.946    | 0.276     | 0.002                  | 0.010                  | 0.006                   | -0.003                 | -0.002                 | 100.0   |
| 0.3      | $R_+$    | sharp   | 0.4      | 0.6   | 0.6    | 0.6                  | 320 | 0.767             | 0.000*    | 0.951    | 0.769     | 0.004                  | 0.010                  | 0.007                   | 0.000                  | 0.001                  | 100.0   |
| 0.3      | $R_+$    | sharp   | 0.4      | 0.6   | 0.8    | 0.8                  | 176 | 0.755             | 0.000*    | 0.945    | 0.180     | 0.008                  | 0.008                  | 0.008                   | -0.010                 | -0.015                 | 100.0   |
| 0.3      | $R_+$    | sharp   | 0.6      | 0.4   | 0.3    | 0.3                  | 468 | 0.772             | 0.000*    | 0.945    | 0.241     | 0.003                  | 0.010                  | 0.007                   | -0.003                 | -0.007                 | 100.0   |
| 0.3      | $R_+$    | sharp   | 0.6      | 0.4   | 0.6    | 0.6                  | 320 | 0.780             | 0.004*    | 0.939    | 0.006*    | 0.004                  | 0.011                  | 0.007                   | -0.005                 | -0.006                 | 100.0   |
| 0.3      | $R_+$    | sharp   | 0.6      | 0.4   | 0.8    | 0.8                  | 176 | 0.777             | 0.001*    | 0.948    | 0.675     | 0.007                  | 0.009                  | 0.008                   | -0.010                 | -0.014                 | 100.0   |
| 0.3      | $R_+$    | sharp   | 0.6      | 0.6   | 0.3    | 0.3                  | 438 | 0.748             | 0.000*    | 0.941    | 0.026*    | -0.005                 | -0.059                 | -0.024                  | 0.020                  | 0.080                  | 100.0   |
| 0.3      | $R_+$    | sharp   | 0.6      | 0.6   | 0.6    | 0.6                  | 301 | 0.773             | 0.000*    | 0.939    | 0.006*    | -0.024                 | -0.063                 | -0.046                  | 0.039                  | 0.078                  | 100.0   |
| 0.3      | $R_+$    | sharp   | 0.6      | 0.6   | 0.8    | 0.8                  | 166 | 0.737             | 0.000*    | 0.948    | 0.675     | -0.037                 | -0.060                 | -0.052                  | 0.058                  | 0.078                  | 100.0   |
| 0.3      | $R_-$    | cons.   | 0.4      | 0.4   | 0.0    | 0.0                  | 559 | 0.778             | 0.001*    | 0.950    | 0.933     | -0.001                 | 0.078                  | -0.000                  | -4.456                 | -70.580                | 100.0   |
| 0.3      | $R_-$    | cons.   | 0.4      | 0.4   | 0.3    | 0.3                  | 508 | 0.799             | 0.453     | 0.951    | 0.900     | 0.007                  | 0.077                  | 0.032                   | -0.022                 | -0.090                 | 100.0   |
| 0.3      | $R_-$    | cons.   | 0.4      | 0.4   | 0.6    | 0.6                  | 358 | 0.802             | 0.632     | 0.943    | 0.086     | 0.027                  | 0.078                  | 0.056                   | -0.050                 | -0.100                 | 100.0   |
| 0.3      | $R_-$    | cons.   | 0.4      | 0.4   | 0.8    | 0.8                  | 201 | 0.802             | 0.615     | 0.947    | 0.402     | 0.051                  | 0.077                  | 0.069                   | -0.078                 | -0.108                 | 100.0   |
| 0.3      | $R_-$    | cons.   | 0.4      | 0.6   | 0.0    | 0.0                  | 524 | 0.743             | 0.000*    | 0.944    | 0.111     | 0.002                  | 0.009                  | -0.001                  | -1.140                 | -1.411                 | 100.0   |
| 0.3      | $R_-$    | cons.   | 0.4      | 0.6   | 0.3    | 0.3                  | 477 | 0.767             | 0.000*    | 0.953    | 0.476     | -0.001                 | 0.011                  | 0.004                   | -0.006                 | -0.010                 | 100.0   |
| 0.3      | $R_-$    | cons.   | 0.4      | 0.6   | 0.6    | 0.6                  | 335 | 0.804             | 0.699     | 0.951    | 0.834     | 0.006                  | 0.010                  | 0.008                   | 0.002                  | -0.005                 | 100.0   |
| 0.3      | $R_-$    | cons.   | 0.4      | 0.6   | 0.8    | 0.8                  | 189 | 0.799             | 0.435     | 0.944    | 0.154     | 0.007                  | 0.009                  | 0.009                   | -0.003                 | -0.008                 | 100.0   |
| 0.3      | $R_-$    | cons.   | 0.6      | 0.4   | 0.0    | 0.0                  | 524 | 0.745             | 0.000*    | 0.944    | 0.154     | -0.001                 | 0.010                  | -0.002                  | -0.256                 | 1.061                  | 100.0   |
| 0.3      | $R_-$    | cons.   | 0.6      | 0.4   | 0.3    | 0.3                  | 477 | 0.763             | 0.000*    | 0.941    | 0.021*    | 0.003                  | 0.011                  | 0.005                   | -0.001                 | -0.000                 | 100.0   |
| 0.3      | $R_-$    | cons.   | 0.6      | 0.4   | 0.6    | 0.6                  | 335 | 0.785             | 0.024*    | 0.945    | 0.209     | 0.004                  | 0.011                  | 0.007                   | 0.005                  | -0.003                 | 100.0   |
| 0.3      | $R_-$    | cons.   | 0.6      | 0.6   | 0.0    | 0.0                  | 489 | 0.736             | 0.000*    | 0.950    | 0.967     | 0.001                  | -0.061                 | -0.002                  | -1.115                 | 0.989                  | 100.0   |
| 0.3      | $R_-$    | cons.   | 0.6      | 0.6   | 0.3    | 0.3                  | 445 | 0.759             | 0.000*    | 0.945    | 0.180     | -0.008                 | -0.060                 | -0.024                  | 0.017                  | 0.085                  | 100.0   |
| 0.3      | $R_-$    | cons.   | 0.6      | 0.6   | 0.6    | 0.6                  | 313 | 0.777             | 0.001*    | 0.945    | 0.209     | -0.022                 | -0.063                 | -0.046                  | 0.042                  | 0.071                  | 100.0   |
| 0.3      | $R_-$    | sharp   | 0.4      | 0.4   | 0.3    | 0.3                  | 498 | 0.776             | 0.001*    | 0.950    | 1.000     | 0.008                  | 0.076                  | 0.032                   | -0.024                 | -0.095                 | 100.0   |
| 0.3      | $R_-$    | sharp   | 0.4      | 0.4   | 0.6    | 0.6                  | 339 | 0.777             | 0.001*    | 0.949    | 0.867     | 0.027                  | 0.077                  | 0.055                   | -0.058                 | -0.106                 | 100.0   |
| 0.3      | $R_-$    | sharp   | 0.4      | 0.4   | 0.8    | 0.8                  | 187 | 0.770             | 0.000*    | 0.938    | 0.004*    | 0.049                  | 0.077                  | 0.068                   | -0.071                 | -0.099                 | 100.0   |
| 0.3      | $R_-$    | sharp   | 0.4      | 0.6   | 0.3    | 0.3                  | 468 | 0.770             | 0.000*    | 0.947    | 0.451     | 0.002                  | 0.010                  | 0.006                   | -0.003                 | -0.002                 | 100.0   |

Continued on next page

Additional simulation results for design II when working assumption A1(a) is violated: responders' end-of-study variance is 25% below the appropriate lower bound.

| $\delta$ | Response         | Formula | $r_{-1}$ | $r_1$ | $\rho$ | $\rho_{\text{size}}$ | $n$ | $1 - \hat{\beta}$ | $p$ value | Coverage | $p$ value | $\text{Cor}(R, Y_0^2)$ | $\text{Cor}(R, Y_1^2)$ | $\text{Cor}(R, Y_0Y_1)$ | $\text{Cov}(Y_0, Y_2)$ | $\text{Cov}(Y_1, Y_2)$ | % Valid |
|----------|------------------|---------|----------|-------|--------|----------------------|-----|-------------------|-----------|----------|-----------|------------------------|------------------------|-------------------------|------------------------|------------------------|---------|
| 0.3      | $R_{-}$          | sharp   | 0.4      | 0.6   | 0.6    | 0.6                  | 320 | 0.769             | 0.000*    | 0.950    | 1.000     | 0.004                  | 0.010                  | 0.007                   | 0.000                  | 0.002                  | 100.0   |
| 0.3      | $R_{-}$          | sharp   | 0.4      | 0.6   | 0.8    | 0.8                  | 176 | 0.774             | 0.000*    | 0.947    | 0.503     | 0.008                  | 0.008                  | 0.008                   | -0.009                 | -0.015                 | 100.0   |
| 0.3      | $R_{-}$          | sharp   | 0.6      | 0.4   | 0.3    | 0.3                  | 468 | 0.767             | 0.000*    | 0.946    | 0.276     | 0.003                  | 0.010                  | 0.007                   | -0.003                 | -0.007                 | 100.0   |
| 0.3      | $R_{-}$          | sharp   | 0.6      | 0.4   | 0.6    | 0.6                  | 320 | 0.757             | 0.000*    | 0.940    | 0.017*    | 0.004                  | 0.011                  | 0.007                   | -0.004                 | -0.005                 | 100.0   |
| 0.3      | $R_{-}$          | sharp   | 0.6      | 0.6   | 0.3    | 0.3                  | 438 | 0.746             | 0.000*    | 0.941    | 0.033*    | -0.005                 | -0.059                 | -0.024                  | 0.020                  | 0.080                  | 100.0   |
| 0.3      | $R_{-}$          | sharp   | 0.6      | 0.6   | 0.6    | 0.6                  | 301 | 0.763             | 0.000*    | 0.940    | 0.012*    | -0.024                 | -0.063                 | -0.046                  | 0.039                  | 0.079                  | 100.0   |
| 0.3      | $R_{\perp\perp}$ | cons.   | 0.4      | 0.4   | 0.0    | 0.0                  | 559 | 0.759             | 0.000*    | 0.940    | 0.017*    | -0.002                 | 0.000                  | -0.002                  | 3.799                  | -2.338                 | 100.0   |
| 0.3      | $R_{\perp\perp}$ | cons.   | 0.4      | 0.4   | 0.0    | 0.0                  | 559 | 0.773             | 0.000*    | 0.945    | 0.241     | -0.001                 | 0.002                  | -0.001                  | 1.782                  | 1.224                  | 100.0   |
| 0.3      | $R_{\perp\perp}$ | cons.   | 0.4      | 0.4   | 0.3    | 0.3                  | 508 | 0.773             | 0.000*    | 0.951    | 0.900     | 0.000                  | -0.002                 | -0.001                  | -0.009                 | -0.007                 | 100.0   |
| 0.3      | $R_{\perp\perp}$ | cons.   | 0.4      | 0.4   | 0.3    | 0.3                  | 508 | 0.784             | 0.016*    | 0.946    | 0.315     | -0.002                 | 0.001                  | -0.002                  | -0.242                 | -0.240                 | 100.0   |
| 0.3      | $R_{\perp\perp}$ | cons.   | 0.4      | 0.4   | 0.6    | 0.6                  | 358 | 0.794             | 0.225     | 0.945    | 0.241     | 0.003                  | 0.002                  | 0.002                   | 0.006                  | 0.004                  | 100.0   |
| 0.3      | $R_{\perp\perp}$ | cons.   | 0.4      | 0.4   | 0.6    | 0.6                  | 358 | 0.812             | 0.948     | 0.951    | 0.834     | 0.002                  | 0.002                  | 0.002                   | -0.122                 | -0.126                 | 100.0   |
| 0.3      | $R_{\perp\perp}$ | cons.   | 0.4      | 0.4   | 0.8    | 0.8                  | 201 | 0.808             | 0.869     | 0.948    | 0.557     | -0.002                 | -0.002                 | -0.002                  | -0.001                 | 0.000                  | 100.0   |
| 0.3      | $R_{\perp\perp}$ | cons.   | 0.4      | 0.4   | 0.8    | 0.8                  | 201 | 0.827             | 1.000     | 0.944    | 0.111     | -0.001                 | -0.001                 | -0.001                  | -0.066                 | -0.066                 | 100.0   |
| 0.3      | $R_{\perp\perp}$ | cons.   | 0.4      | 0.6   | 0.0    | 0.0                  | 524 | 0.750             | 0.000*    | 0.947    | 0.402     | 0.002                  | -0.001                 | 0.000                   | -8.223                 | -2.149                 | 100.0   |
| 0.3      | $R_{\perp\perp}$ | cons.   | 0.4      | 0.6   | 0.0    | 0.0                  | 524 | 0.757             | 0.000*    | 0.956    | 0.142     | -0.000                 | 0.001                  | -0.001                  | -0.724                 | -0.705                 | 100.0   |
| 0.3      | $R_{\perp\perp}$ | cons.   | 0.4      | 0.6   | 0.3    | 0.3                  | 477 | 0.763             | 0.000*    | 0.950    | 1.000     | 0.000                  | -0.003                 | -0.001                  | -0.002                 | -0.004                 | 100.0   |
| 0.3      | $R_{\perp\perp}$ | cons.   | 0.4      | 0.6   | 0.3    | 0.3                  | 477 | 0.775             | 0.000*    | 0.941    | 0.033*    | 0.003                  | -0.002                 | -0.002                  | -0.279                 | -0.282                 | 100.0   |
| 0.3      | $R_{\perp\perp}$ | cons.   | 0.4      | 0.6   | 0.6    | 0.6                  | 335 | 0.796             | 0.315     | 0.958    | 0.054     | -0.001                 | -0.001                 | -0.000                  | 0.000                  | -0.003                 | 100.0   |
| 0.3      | $R_{\perp\perp}$ | cons.   | 0.4      | 0.6   | 0.6    | 0.6                  | 335 | 0.806             | 0.800     | 0.951    | 0.900     | -0.001                 | -0.000                 | 0.002                   | -0.155                 | -0.154                 | 100.0   |
| 0.3      | $R_{\perp\perp}$ | cons.   | 0.4      | 0.6   | 0.8    | 0.8                  | 189 | 0.810             | 0.925     | 0.947    | 0.503     | 0.002                  | 0.001                  | 0.001                   | 0.001                  | -0.002                 | 100.0   |
| 0.3      | $R_{\perp\perp}$ | cons.   | 0.4      | 0.6   | 0.8    | 0.8                  | 189 | 0.816             | 0.989     | 0.944    | 0.154     | -0.002                 | -0.001                 | -0.001                  | -0.080                 | -0.081                 | 100.0   |
| 0.3      | $R_{\perp\perp}$ | cons.   | 0.6      | 0.4   | 0.0    | 0.0                  | 524 | 0.733             | 0.000*    | 0.956    | 0.142     | -0.002                 | 0.001                  | -0.000                  | 2.060                  | -0.604                 | 100.0   |
| 0.3      | $R_{\perp\perp}$ | cons.   | 0.6      | 0.4   | 0.0    | 0.0                  | 524 | 0.755             | 0.000*    | 0.942    | 0.049*    | -0.000                 | -0.001                 | -0.002                  | -0.014                 | 0.821                  | 100.0   |
| 0.3      | $R_{\perp\perp}$ | cons.   | 0.6      | 0.4   | 0.3    | 0.3                  | 477 | 0.762             | 0.000*    | 0.946    | 0.276     | -0.000                 | 0.003                  | 0.001                   | -0.005                 | -0.001                 | 100.0   |
| 0.3      | $R_{\perp\perp}$ | cons.   | 0.6      | 0.4   | 0.3    | 0.3                  | 477 | 0.771             | 0.000*    | 0.947    | 0.402     | 0.001                  | -0.001                 | -0.000                  | -0.278                 | -0.278                 | 100.0   |
| 0.3      | $R_{\perp\perp}$ | cons.   | 0.6      | 0.4   | 0.6    | 0.6                  | 335 | 0.780             | 0.004*    | 0.951    | 0.834     | 0.001                  | 0.001                  | 0.000                   | 0.004                  | 0.003                  | 100.0   |
| 0.3      | $R_{\perp\perp}$ | cons.   | 0.6      | 0.4   | 0.6    | 0.6                  | 335 | 0.797             | 0.331     | 0.939    | 0.007*    | -0.001                 | 0.002                  | 0.001                   | -0.159                 | -0.159                 | 100.0   |
| 0.3      | $R_{\perp\perp}$ | cons.   | 0.6      | 0.4   | 0.8    | 0.8                  | 189 | 0.775             | 0.000*    | 0.935    | 0.000*    | -0.002                 | -0.001                 | -0.001                  | 0.001                  | 0.001                  | 100.0   |
| 0.3      | $R_{\perp\perp}$ | cons.   | 0.6      | 0.4   | 0.8    | 0.8                  | 189 | 0.805             | 0.760     | 0.940    | 0.017*    | 0.003                  | 0.003                  | 0.003                   | -0.129                 | -0.131                 | 100.0   |
| 0.3      | $R_{\perp\perp}$ | cons.   | 0.6      | 0.6   | 0.0    | 0.0                  | 489 | 0.737             | 0.000*    | 0.950    | 1.000     | 0.002                  | 0.002                  | -0.002                  | -0.764                 | -1.341                 | 100.0   |
| 0.3      | $R_{\perp\perp}$ | cons.   | 0.6      | 0.6   | 0.0    | 0.0                  | 489 | 0.737             | 0.000*    | 0.945    | 0.209     | -0.001                 | 0.001                  | -0.000                  | -44.120                | -0.295                 | 100.0   |
| 0.3      | $R_{\perp\perp}$ | cons.   | 0.6      | 0.6   | 0.3    | 0.3                  | 445 | 0.743             | 0.000*    | 0.941    | 0.026*    | 0.001                  | -0.001                 | 0.002                   | 0.001                  | 0.002                  | 100.0   |
| 0.3      | $R_{\perp\perp}$ | cons.   | 0.6      | 0.6   | 0.3    | 0.3                  | 445 | 0.763             | 0.000*    | 0.949    | 0.801     | -0.003                 | -0.002                 | -0.001                  | -0.316                 | -0.320                 | 100.0   |
| 0.3      | $R_{\perp\perp}$ | cons.   | 0.6      | 0.6   | 0.6    | 0.6                  | 313 | 0.784             | 0.016*    | 0.937    | 0.002*    | 0.001                  | 0.003                  | 0.002                   | -0.001                 | 0.001                  | 100.0   |
| 0.3      | $R_{\perp\perp}$ | cons.   | 0.6      | 0.6   | 0.6    | 0.6                  | 313 | 0.806             | 0.787     | 0.951    | 0.900     | 0.001                  | 0.002                  | 0.002                   | -0.177                 | -0.177                 | 100.0   |
| 0.3      | $R_{\perp\perp}$ | cons.   | 0.6      | 0.6   | 0.8    | 0.8                  | 176 | 0.777             | 0.001*    | 0.949    | 0.867     | 0.002                  | -0.001                 | 0.001                   | -0.000                 | -0.001                 | 100.0   |
| 0.3      | $R_{\perp\perp}$ | cons.   | 0.6      | 0.6   | 0.8    | 0.8                  | 176 | 0.820             | 0.997     | 0.940    | 0.012*    | 0.004                  | 0.005                  | 0.004                   | -0.139                 | -0.141                 | 100.0   |
| 0.3      | $R_{\perp\perp}$ | sharp   | 0.4      | 0.4   | 0.3    | 0.3                  | 498 | 0.784             | 0.016*    | 0.952    | 0.586     | -0.001                 | -0.002                 | -0.001                  | -0.241                 | -0.238                 | 100.0   |
| 0.3      | $R_{\perp\perp}$ | sharp   | 0.4      | 0.4   | 0.3    | 0.3                  | 498 | 0.771             | 0.000*    | 0.950    | 0.967     | -0.001                 | 0.002                  | -0.001                  | -0.002                 | -0.006                 | 100.0   |
| 0.3      | $R_{\perp\perp}$ | sharp   | 0.4      | 0.4   | 0.6    | 0.6                  | 339 | 0.781             | 0.005*    | 0.941    | 0.026*    | -0.003                 | -0.001                 | -0.002                  | -0.135                 | -0.133                 | 100.0   |
| 0.3      | $R_{\perp\perp}$ | sharp   | 0.4      | 0.4   | 0.6    | 0.6                  | 339 | 0.772             | 0.000*    | 0.946    | 0.276     | -0.002                 | -0.003                 | -0.002                  | -0.000                 | -0.007                 | 100.0   |
| 0.3      | $R_{\perp\perp}$ | sharp   | 0.4      | 0.4   | 0.8    | 0.8                  | 187 | 0.803             | 0.650     | 0.947    | 0.451     | 0.003                  | -0.000                 | 0.001                   | -0.061                 | -0.062                 | 100.0   |
| 0.3      | $R_{\perp\perp}$ | sharp   | 0.4      | 0.4   | 0.8    | 0.8                  | 187 | 0.786             | 0.033*    | 0.949    | 0.867     | -0.003                 | -0.001                 | -0.001                  | -0.001                 | 0.001                  | 100.0   |
| 0.3      | $R_{\perp\perp}$ | sharp   | 0.4      | 0.6   | 0.3    | 0.3                  | 468 | 0.753             | 0.000*    | 0.947    | 0.451     | -0.001                 | -0.002                 | -0.003                  | -0.282                 | -0.276                 | 100.0   |

Continued on next page

Additional simulation results for design II when working assumption A1(a) is violated: responders' end-of-study variance is 25% below the appropriate lower bound.

| $\delta$ | Response        | Formula | $r_{-1}$ | $r_1$ | $\rho$ | $\rho_{\text{size}}$ | $n$ | $1 - \hat{\beta}$ | $p$ value | Coverage | $p$ value | $\text{Cor}(R, Y_0^2)$ | $\text{Cor}(R, Y_1^2)$ | $\text{Cor}(R, Y_0Y_1)$ | $\text{Cov}(Y_0, Y_2)$ | $\text{Cov}(Y_1, Y_2)$ | % Valid |
|----------|-----------------|---------|----------|-------|--------|----------------------|-----|-------------------|-----------|----------|-----------|------------------------|------------------------|-------------------------|------------------------|------------------------|---------|
| 0.3      | $R_{\perp}$     | sharp   | 0.4      | 0.6   | 0.3    | 0.3                  | 468 | 0.766             | 0.000*    | 0.945    | 0.180     | -0.000                 | -0.001                 | -0.002                  | -0.011                 | -0.001                 | 100.0   |
| 0.3      | $R_{\perp}$     | sharp   | 0.4      | 0.6   | 0.6    | 0.6                  | 320 | 0.786             | 0.030*    | 0.947    | 0.451     | -0.002                 | -0.002                 | -0.002                  | -0.160                 | -0.160                 | 100.0   |
| 0.3      | $R_{\perp}$     | sharp   | 0.4      | 0.6   | 0.6    | 0.6                  | 320 | 0.764             | 0.000*    | 0.952    | 0.586     | -0.003                 | -0.001                 | -0.001                  | -0.002                 | -0.006                 | 100.0   |
| 0.3      | $R_{\perp}$     | sharp   | 0.4      | 0.6   | 0.8    | 0.8                  | 176 | 0.786             | 0.027*    | 0.948    | 0.675     | 0.001                  | 0.003                  | 0.002                   | -0.073                 | -0.072                 | 100.0   |
| 0.3      | $R_{\perp}$     | sharp   | 0.4      | 0.6   | 0.8    | 0.8                  | 176 | 0.792             | 0.132     | 0.945    | 0.241     | -0.001                 | -0.002                 | -0.002                  | 0.001                  | -0.000                 | 100.0   |
| 0.3      | $R_{\perp}$     | sharp   | 0.6      | 0.4   | 0.3    | 0.3                  | 468 | 0.763             | 0.000*    | 0.947    | 0.503     | 0.001                  | 0.001                  | 0.002                   | -0.276                 | -0.281                 | 100.0   |
| 0.3      | $R_{\perp}$     | sharp   | 0.6      | 0.4   | 0.3    | 0.3                  | 468 | 0.757             | 0.000*    | 0.947    | 0.402     | 0.000                  | 0.001                  | 0.002                   | 0.001                  | -0.001                 | 100.0   |
| 0.3      | $R_{\perp}$     | sharp   | 0.6      | 0.4   | 0.6    | 0.6                  | 320 | 0.792             | 0.142     | 0.946    | 0.357     | -0.001                 | -0.001                 | -0.001                  | -0.156                 | -0.155                 | 100.0   |
| 0.3      | $R_{\perp}$     | sharp   | 0.6      | 0.4   | 0.6    | 0.6                  | 320 | 0.758             | 0.000*    | 0.949    | 0.737     | 0.003                  | 0.001                  | 0.001                   | 0.003                  | 0.005                  | 100.0   |
| 0.3      | $R_{\perp}$     | sharp   | 0.6      | 0.4   | 0.8    | 0.8                  | 176 | 0.791             | 0.123     | 0.946    | 0.315     | 0.001                  | 0.002                  | 0.001                   | -0.135                 | -0.134                 | 100.0   |
| 0.3      | $R_{\perp}$     | sharp   | 0.6      | 0.4   | 0.8    | 0.8                  | 176 | 0.754             | 0.000*    | 0.944    | 0.154     | 0.001                  | 0.002                  | 0.002                   | -0.001                 | -0.000                 | 100.0   |
| 0.3      | $R_{\perp}$     | sharp   | 0.6      | 0.6   | 0.3    | 0.3                  | 438 | 0.751             | 0.000*    | 0.942    | 0.059     | 0.001                  | 0.002                  | 0.002                   | -0.315                 | -0.317                 | 100.0   |
| 0.3      | $R_{\perp}$     | sharp   | 0.6      | 0.6   | 0.3    | 0.3                  | 438 | 0.743             | 0.000*    | 0.950    | 0.967     | 0.001                  | 0.002                  | -0.002                  | 0.002                  | -0.005                 | 100.0   |
| 0.3      | $R_{\perp}$     | sharp   | 0.6      | 0.6   | 0.6    | 0.6                  | 301 | 0.787             | 0.040*    | 0.946    | 0.357     | -0.001                 | -0.001                 | -0.002                  | -0.182                 | -0.182                 | 100.0   |
| 0.3      | $R_{\perp}$     | sharp   | 0.6      | 0.6   | 0.6    | 0.6                  | 301 | 0.754             | 0.000*    | 0.941    | 0.021*    | 0.002                  | 0.002                  | 0.002                   | 0.005                  | 0.007                  | 100.0   |
| 0.3      | $R_{\perp}$     | sharp   | 0.6      | 0.6   | 0.8    | 0.8                  | 166 | 0.789             | 0.064     | 0.943    | 0.071     | 0.002                  | 0.003                  | 0.003                   | -0.146                 | -0.146                 | 100.0   |
| 0.3      | $R_{\perp}$     | sharp   | 0.6      | 0.6   | 0.8    | 0.8                  | 166 | 0.751             | 0.000*    | 0.949    | 0.737     | 0.002                  | 0.002                  | 0.002                   | -0.000                 | 0.001                  | 100.0   |
| 0.3      | $R_+^{1\kappa}$ | cons.   | 0.3      | 0.4   | 0.0    | 0.0                  | 578 | 0.777             | 0.001*    | 0.952    | 0.706     | -0.002                 | 0.223                  | -0.001                  | -1.007                 | 0.337                  | 100.0   |
| 0.3      | $R_+^{1\kappa}$ | cons.   | 0.3      | 0.4   | 0.3    | 0.3                  | 526 | 0.785             | 0.024*    | 0.949    | 0.867     | 0.019                  | 0.222                  | 0.089                   | -0.079                 | -0.384                 | 100.0   |
| 0.3      | $R_+^{1\kappa}$ | cons.   | 0.3      | 0.4   | 0.6    | 0.6                  | 370 | 0.806             | 0.813     | 0.950    | 0.933     | 0.081                  | 0.223                  | 0.162                   | -0.159                 | -0.383                 | 100.0   |
| 0.3      | $R_+^{1\kappa}$ | cons.   | 0.5      | 0.6   | 0.0    | 0.0                  | 510 | 0.760             | 0.000*    | 0.948    | 0.615     | -0.001                 | -0.057                 | -0.001                  | -1.111                 | 1.075                  | 100.0   |
| 0.3      | $R_+^{1\kappa}$ | cons.   | 0.5      | 0.6   | 0.3    | 0.3                  | 464 | 0.768             | 0.000*    | 0.947    | 0.503     | -0.006                 | -0.060                 | -0.025                  | 0.016                  | 0.127                  | 100.0   |
| 0.3      | $R_+^{1\kappa}$ | cons.   | 0.5      | 0.6   | 0.6    | 0.6                  | 326 | 0.780             | 0.004*    | 0.937    | 0.001*    | -0.022                 | -0.060                 | -0.043                  | 0.039                  | 0.124                  | 100.0   |
| 0.3      | $R_+^{1\kappa}$ | sharp   | 0.3      | 0.4   | 0.3    | 0.3                  | 515 | 0.781             | 0.005*    | 0.944    | 0.154     | 0.020                  | 0.223                  | 0.091                   | -0.064                 | -0.384                 | 100.0   |
| 0.3      | $R_+^{1\kappa}$ | sharp   | 0.3      | 0.4   | 0.6    | 0.6                  | 349 | 0.771             | 0.000*    | 0.949    | 0.737     | 0.081                  | 0.226                  | 0.163                   | -0.158                 | -0.383                 | 100.0   |
| 0.3      | $R_+^{1\kappa}$ | sharp   | 0.5      | 0.6   | 0.3    | 0.3                  | 456 | 0.784             | 0.016*    | 0.951    | 0.900     | -0.004                 | -0.058                 | -0.023                  | 0.027                  | 0.136                  | 100.0   |
| 0.3      | $R_+^{1\kappa}$ | sharp   | 0.5      | 0.6   | 0.6    | 0.6                  | 312 | 0.789             | 0.064     | 0.951    | 0.900     | -0.021                 | -0.061                 | -0.044                  | 0.047                  | 0.133                  | 100.0   |
| 0.3      | $R_-^{1\kappa}$ | cons.   | 0.3      | 0.4   | 0.0    | 0.0                  | 578 | 0.736             | 0.000*    | 0.950    | 1.000     | -0.002                 | 0.223                  | -0.001                  | -1.008                 | 0.363                  | 100.0   |
| 0.3      | $R_-^{1\kappa}$ | cons.   | 0.3      | 0.4   | 0.3    | 0.3                  | 526 | 0.759             | 0.000*    | 0.948    | 0.675     | 0.019                  | 0.222                  | 0.089                   | -0.079                 | -0.384                 | 100.0   |
| 0.3      | $R_-^{1\kappa}$ | cons.   | 0.3      | 0.4   | 0.6    | 0.6                  | 370 | 0.783             | 0.010*    | 0.950    | 0.967     | 0.081                  | 0.223                  | 0.162                   | -0.159                 | -0.383                 | 100.0   |
| 0.3      | $R_-^{1\kappa}$ | cons.   | 0.5      | 0.6   | 0.0    | 0.0                  | 510 | 0.691             | 0.000*    | 0.948    | 0.615     | -0.001                 | -0.057                 | -0.001                  | -1.124                 | 1.070                  | 100.0   |
| 0.3      | $R_-^{1\kappa}$ | cons.   | 0.5      | 0.6   | 0.3    | 0.3                  | 464 | 0.717             | 0.000*    | 0.946    | 0.276     | -0.006                 | -0.060                 | -0.025                  | 0.015                  | 0.127                  | 100.0   |
| 0.3      | $R_-^{1\kappa}$ | cons.   | 0.5      | 0.6   | 0.6    | 0.6                  | 326 | 0.671             | 0.000*    | 0.937    | 0.001*    | -0.022                 | -0.060                 | -0.043                  | 0.040                  | 0.125                  | 100.0   |
| 0.3      | $R_-^{1\kappa}$ | sharp   | 0.3      | 0.4   | 0.3    | 0.3                  | 515 | 0.752             | 0.000*    | 0.944    | 0.154     | 0.020                  | 0.223                  | 0.091                   | -0.064                 | -0.384                 | 100.0   |
| 0.3      | $R_-^{1\kappa}$ | sharp   | 0.3      | 0.4   | 0.6    | 0.6                  | 349 | 0.750             | 0.000*    | 0.951    | 0.900     | 0.081                  | 0.226                  | 0.163                   | -0.158                 | -0.383                 | 100.0   |
| 0.3      | $R_-^{1\kappa}$ | sharp   | 0.5      | 0.6   | 0.3    | 0.3                  | 456 | 0.729             | 0.000*    | 0.952    | 0.645     | -0.004                 | -0.058                 | -0.023                  | 0.027                  | 0.136                  | 100.0   |
| 0.3      | $R_-^{1\kappa}$ | sharp   | 0.5      | 0.6   | 0.6    | 0.6                  | 312 | 0.668             | 0.000*    | 0.948    | 0.675     | -0.021                 | -0.061                 | -0.044                  | 0.048                  | 0.134                  | 100.0   |
| 0.3      | $R_+^{2\kappa}$ | cons.   | 0.4      | 0.4   | 0.0    | 0.0                  | 559 | 0.764             | 0.000*    | 0.951    | 0.834     | 0.000                  | 0.145                  | -0.001                  | -1.455                 | 4.931                  | 100.0   |
| 0.3      | $R_+^{2\kappa}$ | cons.   | 0.4      | 0.4   | 0.3    | 0.3                  | 508 | 0.787             | 0.044*    | 0.951    | 0.834     | 0.013                  | 0.144                  | 0.058                   | -0.053                 | -0.257                 | 100.0   |
| 0.3      | $R_+^{2\kappa}$ | cons.   | 0.4      | 0.4   | 0.6    | 0.6                  | 358 | 0.799             | 0.471     | 0.939    | 0.009*    | 0.051                  | 0.144                  | 0.105                   | -0.101                 | -0.261                 | 100.0   |
| 0.3      | $R_+^{2\kappa}$ | cons.   | 0.4      | 0.6   | 0.0    | 0.0                  | 524 | 0.751             | 0.000*    | 0.942    | 0.049*    | -0.002                 | 0.001                  | 0.002                   | 3.295                  | -0.810                 | 100.0   |
| 0.3      | $R_+^{2\kappa}$ | cons.   | 0.4      | 0.6   | 0.3    | 0.3                  | 477 | 0.777             | 0.001*    | 0.949    | 0.867     | -0.001                 | -0.003                 | 0.002                   | 0.009                  | 0.002                  | 100.0   |
| 0.3      | $R_+^{2\kappa}$ | cons.   | 0.4      | 0.6   | 0.6    | 0.6                  | 335 | 0.809             | 0.896     | 0.949    | 0.867     | -0.002                 | -0.002                 | -0.002                  | -0.004                 | -0.009                 | 100.0   |
| 0.3      | $R_+^{2\kappa}$ | cons.   | 0.6      | 0.4   | 0.0    | 0.0                  | 524 | 0.753             | 0.000*    | 0.951    | 0.769     | -0.001                 | -0.001                 | 0.002                   | 0.029                  | 1.119                  | 100.0   |
| 0.3      | $R_+^{2\kappa}$ | cons.   | 0.6      | 0.4   | 0.3    | 0.3                  | 477 | 0.773             | 0.000*    | 0.950    | 0.933     | -0.001                 | -0.004                 | 0.001                   | 0.002                  | 0.007                  | 100.0   |

Continued on next page









Additional simulation results for design II when working assumption A1(a) is violated: responders' end-of-study variance is 25% below the appropriate lower bound.

| $\delta$ | Response        | Formula | $r_{-1}$ | $r_1$ | $\rho$ | $\rho_{\text{size}}$ | $n$ | $1 - \hat{\beta}$ | $p$ value | Coverage | $p$ value | $\text{Cor}(R, Y_0^2)$ | $\text{Cor}(R, Y_1^2)$ | $\text{Cor}(R, Y_0 Y_1)$ | $\text{Cov}(Y_0, Y_2)$ | $\text{Cov}(Y_1, Y_2)$ | % Valid |
|----------|-----------------|---------|----------|-------|--------|----------------------|-----|-------------------|-----------|----------|-----------|------------------------|------------------------|--------------------------|------------------------|------------------------|---------|
| 0.5      | $R_+^{2\kappa}$ | cons.   | 0.6      | 0.4   | 0.3    | 0.3                  | 172 | 0.775             | 0.000*    | 0.944    | 0.132     | 0.001                  | 0.005                  | -0.002                   | 0.008                  | 0.002                  | 100.0   |
| 0.5      | $R_+^{2\kappa}$ | cons.   | 0.6      | 0.4   | 0.6    | 0.6                  | 121 | 0.801             | 0.544     | 0.943    | 0.086     | -0.001                 | -0.003                 | -0.001                   | -0.010                 | -0.021                 | 100.0   |
| 0.5      | $R_+^{2\kappa}$ | cons.   | 0.6      | 0.6   | 0.0    | 0.0                  | 176 | 0.747             | 0.000*    | 0.946    | 0.315     | 0.002                  | -0.146                 | 0.004                    | -0.865                 | -0.536                 | 100.0   |
| 0.5      | $R_+^{2\kappa}$ | cons.   | 0.6      | 0.6   | 0.3    | 0.3                  | 160 | 0.777             | 0.001*    | 0.947    | 0.503     | -0.015                 | -0.149                 | -0.060                   | 0.035                  | 0.312                  | 100.0   |
| 0.5      | $R_+^{2\kappa}$ | cons.   | 0.6      | 0.6   | 0.6    | 0.6                  | 113 | 0.804             | 0.715     | 0.944    | 0.154     | -0.053                 | -0.158                 | -0.113                   | 0.128                  | 0.347                  | 100.0   |
| 0.5      | $R_+^{2\kappa}$ | sharp   | 0.4      | 0.4   | 0.3    | 0.3                  | 180 | 0.780             | 0.003*    | 0.944    | 0.111     | 0.015                  | 0.147                  | 0.060                    | -0.031                 | -0.252                 | 100.0   |
| 0.5      | $R_+^{2\kappa}$ | sharp   | 0.4      | 0.4   | 0.6    | 0.6                  | 122 | 0.777             | 0.001*    | 0.940    | 0.013*    | 0.053                  | 0.147                  | 0.107                    | -0.101                 | -0.269                 | 100.0   |
| 0.5      | $R_+^{2\kappa}$ | sharp   | 0.4      | 0.6   | 0.3    | 0.3                  | 169 | 0.774             | 0.000*    | 0.941    | 0.026*    | 0.004                  | 0.003                  | -0.001                   | 0.004                  | -0.004                 | 100.0   |
| 0.5      | $R_+^{2\kappa}$ | sharp   | 0.4      | 0.6   | 0.6    | 0.6                  | 115 | 0.792             | 0.152     | 0.940    | 0.012*    | -0.004                 | -0.009                 | -0.007                   | -0.004                 | -0.011                 | 100.0   |
| 0.5      | $R_+^{2\kappa}$ | sharp   | 0.6      | 0.4   | 0.3    | 0.3                  | 169 | 0.767             | 0.000*    | 0.937    | 0.002*    | 0.004                  | 0.002                  | -0.001                   | -0.001                 | -0.010                 | 100.0   |
| 0.5      | $R_+^{2\kappa}$ | sharp   | 0.6      | 0.4   | 0.6    | 0.6                  | 115 | 0.780             | 0.003*    | 0.938    | 0.003*    | -0.002                 | -0.007                 | -0.005                   | 0.003                  | -0.001                 | 100.0   |
| 0.5      | $R_+^{2\kappa}$ | sharp   | 0.6      | 0.6   | 0.3    | 0.3                  | 158 | 0.755             | 0.000*    | 0.941    | 0.021*    | -0.011                 | -0.145                 | -0.059                   | 0.029                  | 0.338                  | 100.0   |



Additional simulation results for design II when working assumption A1(b) is violated: response is highly correlated  
with  $(Y_1^{(d)} - \mu_1^{(d)})^2$

| $\delta$ | Response | Formula | $r_{-1}$ | $r_1$ | $\rho$ | $\rho_{\text{size}}$ | $n$ | $1 - \hat{\beta}$ | $p$ value | Coverage | $p$ value | $\text{Cor}(R, Y_0^2)$ | $\text{Cor}(R, Y_1^2)$ | $\text{Cor}(R, Y_0 Y_1)$ | $\text{Cov}(Y_0, Y_2)$ | $\text{Cov}(Y_1, Y_2)$ | % Valid |
|----------|----------|---------|----------|-------|--------|----------------------|-----|-------------------|-----------|----------|-----------|------------------------|------------------------|--------------------------|------------------------|------------------------|---------|
| 0.5      | $R_+^2$  | sharp   | 0.4      | 0.4   | 0.6    | 0.6                  | 122 | 0.759             | 0.000*    | 0.933    | 0.000*    | 0.246                  | 0.709                  | 0.508                    | 2.186                  | 9.166                  | 100.0   |
| 0.5      | $R_+^2$  | sharp   | 0.4      | 0.6   | 0.3    | 0.3                  | 169 | 0.798             | 0.417     | 0.948    | 0.615     | 0.054                  | 0.622                  | 0.246                    | 0.695                  | 11.589                 | 100.0   |
| 0.5      | $R_+^2$  | sharp   | 0.4      | 0.6   | 0.6    | 0.6                  | 115 | 0.752             | 0.000*    | 0.942    | 0.059     | 0.218                  | 0.636                  | 0.455                    | 2.106                  | 11.540                 | 100.0   |
| 0.5      | $R_+^2$  | sharp   | 0.6      | 0.4   | 0.3    | 0.3                  | 169 | 0.801             | 0.544     | 0.948    | 0.557     | 0.055                  | 0.624                  | 0.246                    | 0.694                  | 11.057                 | 100.0   |
| 0.5      | $R_+^2$  | sharp   | 0.6      | 0.4   | 0.6    | 0.6                  | 115 | 0.763             | 0.000*    | 0.938    | 0.003*    | 0.219                  | 0.636                  | 0.455                    | 2.109                  | 11.361                 | 100.0   |
| 0.5      | $R_+^2$  | sharp   | 0.6      | 0.6   | 0.3    | 0.3                  | 158 | 0.799             | 0.453     | 0.941    | 0.021*    | 0.048                  | 0.545                  | 0.217                    | 0.617                  | 17.189                 | 100.0   |
| 0.5      | $R_+^2$  | sharp   | 0.6      | 0.6   | 0.6    | 0.6                  | 109 | 0.752             | 0.000*    | 0.941    | 0.026*    | 0.195                  | 0.552                  | 0.395                    | 1.985                  | 16.967                 | 100.0   |
| 0.5      | $R_-^2$  | cons.   | 0.4      | 0.4   | 0.0    | 0.0                  | 201 | 0.915             | 1.000     | 0.934    | 0.000*    | -0.001                 | -0.428                 | -0.003                   | 0.350                  | -0.242                 | 99.9    |
| 0.5      | $R_-^2$  | cons.   | 0.4      | 0.4   | 0.3    | 0.3                  | 183 | 0.901             | 1.000     | 0.941    | 0.026*    | -0.040                 | -0.428                 | -0.175                   | 0.162                  | 1.630                  | 100.0   |
| 0.5      | $R_-^2$  | cons.   | 0.4      | 0.6   | 0.0    | 0.0                  | 189 | 0.894             | 1.000     | 0.952    | 0.675     | -0.001                 | -0.358                 | -0.003                   | -0.783                 | -2.904                 | 99.9    |
| 0.5      | $R_-^2$  | cons.   | 0.4      | 0.6   | 0.3    | 0.3                  | 172 | 0.888             | 1.000     | 0.940    | 0.013*    | -0.031                 | -0.363                 | -0.142                   | 0.121                  | 1.249                  | 100.0   |
| 0.5      | $R_-^2$  | cons.   | 0.6      | 0.4   | 0.0    | 0.0                  | 189 | 0.895             | 1.000     | 0.949    | 0.867     | -0.000                 | -0.357                 | -0.004                   | 1.472                  | -0.443                 | 100.0   |
| 0.5      | $R_-^2$  | cons.   | 0.6      | 0.4   | 0.3    | 0.3                  | 172 | 0.887             | 1.000     | 0.942    | 0.059     | -0.031                 | -0.364                 | -0.142                   | 0.120                  | 1.196                  | 99.9    |
| 0.5      | $R_-^2$  | cons.   | 0.6      | 0.6   | 0.0    | 0.0                  | 176 | 0.849             | 1.000     | 0.947    | 0.402     | -0.002                 | -0.292                 | -0.004                   | -1.504                 | 0.477                  | 100.0   |
| 0.5      | $R_-^2$  | cons.   | 0.6      | 0.6   | 0.3    | 0.3                  | 160 | 0.873             | 1.000     | 0.942    | 0.049*    | -0.027                 | -0.292                 | -0.117                   | 0.069                  | 0.826                  | 100.0   |
| 0.5      | $R_-^2$  | sharp   | 0.4      | 0.4   | 0.3    | 0.3                  | 180 | 0.899             | 1.000     | 0.940    | 0.011*    | -0.040                 | -0.430                 | -0.171                   | 0.150                  | 1.676                  | 100.0   |
| 0.5      | $R_-^2$  | sharp   | 0.4      | 0.6   | 0.3    | 0.3                  | 169 | 0.887             | 1.000     | 0.940    | 0.011*    | -0.036                 | -0.360                 | -0.142                   | 0.112                  | 1.180                  | 99.9    |
| 0.5      | $R_-^2$  | sharp   | 0.6      | 0.4   | 0.3    | 0.3                  | 169 | 0.873             | 1.000     | 0.942    | 0.059     | -0.035                 | -0.359                 | -0.141                   | 0.118                  | 1.205                  | 99.9    |
| 0.5      | $R_-^2$  | sharp   | 0.6      | 0.6   | 0.3    | 0.3                  | 158 | 0.863             | 1.000     | 0.945    | 0.241     | -0.028                 | -0.292                 | -0.116                   | 0.087                  | 0.857                  | 100.0   |



Additional simulation results for design II when working assumption A1(c) is violated.

| $\delta$ | Response    | Formula | $r_{-1}$ | $r_1$ | $\rho$ | $\rho_{\text{size}}$ | $n$ | $1 - \hat{\beta}$ | $p$ value | Coverage | $p$ value | $\text{Cor}(R, Y_0^2)$ | $\text{Cor}(R, Y_1^2)$ | $\text{Cor}(R, Y_0 Y_1)$ | $\text{Cov}(Y_0, Y_2)$ | $\text{Cov}(Y_1, Y_2)$ | % Valid |
|----------|-------------|---------|----------|-------|--------|----------------------|-----|-------------------|-----------|----------|-----------|------------------------|------------------------|--------------------------|------------------------|------------------------|---------|
| 0.5      | $R_{\perp}$ | sharp   | 0.6      | 0.6   | 0.8    | 0.8                  | 60  | 0.766             | 0.000*    | 0.938    | 0.004*    | 0.005                  | 0.003                  | 0.003                    | 0.364                  | 0.358                  | 99.3    |





Additional simulation results for design II when working assumption A2 is violated: the true within-person correlation structure is AR(1) with correlation  $\rho$

| $\delta$ | Response         | Formula | $r_{-1}$ | $r_1$ | $\rho$ | $\rho_{\text{size}}$ | $n$ | $1 - \hat{\beta}$ | $p$ value | Coverage | $p$ value | $\text{Cor}(R, Y_0^2)$ | $\text{Cor}(R, Y_1^2)$ | $\text{Cor}(R, Y_0Y_1)$ | $\text{Cov}(Y_0, Y_2)$ | $\text{Cov}(Y_1, Y_2)$ | % Valid |
|----------|------------------|---------|----------|-------|--------|----------------------|-----|-------------------|-----------|----------|-----------|------------------------|------------------------|-------------------------|------------------------|------------------------|---------|
| 0.5      | $R_{\perp\perp}$ | sharp   | 0.4      | 0.6   | 0.3    | 0.3                  | 169 | 0.758             | 0.000*    | 0.938    | 0.003*    | 0.005                  | -0.003                 | -0.002                  | -0.040                 | -0.009                 | 100.0   |
| 0.5      | $R_{\perp\perp}$ | sharp   | 0.4      | 0.6   | 0.6    | 0.6                  | 115 | 0.684             | 0.000*    | 0.950    | 0.933     | 0.004                  | -0.001                 | 0.004                   | -0.005                 | 0.001                  | 100.0   |
| 0.5      | $R_{\perp\perp}$ | sharp   | 0.4      | 0.6   | 0.8    | 0.8                  | 64  | 0.622             | 0.000*    | 0.937    | 0.001*    | -0.001                 | 0.004                  | 0.003                   | 0.010                  | 0.011                  | 99.7    |
| 0.5      | $R_{\perp\perp}$ | sharp   | 0.6      | 0.4   | 0.3    | 0.3                  | 169 | 0.749             | 0.000*    | 0.939    | 0.009*    | -0.005                 | 0.003                  | 0.002                   | 0.013                  | 0.008                  | 100.0   |
| 0.5      | $R_{\perp\perp}$ | sharp   | 0.6      | 0.4   | 0.6    | 0.6                  | 115 | 0.677             | 0.000*    | 0.942    | 0.049*    | -0.004                 | 0.001                  | -0.004                  | -0.011                 | -0.006                 | 100.0   |
| 0.5      | $R_{\perp\perp}$ | sharp   | 0.6      | 0.4   | 0.8    | 0.8                  | 64  | 0.621             | 0.000*    | 0.934    | 0.000*    | 0.001                  | -0.004                 | -0.002                  | 0.004                  | 0.004                  | 99.9    |
| 0.5      | $R_{\perp\perp}$ | sharp   | 0.6      | 0.6   | 0.3    | 0.3                  | 158 | 0.774             | 0.000*    | 0.934    | 0.000*    | -0.000                 | -0.001                 | 0.002                   | 0.004                  | -0.003                 | 100.0   |
| 0.5      | $R_{\perp\perp}$ | sharp   | 0.6      | 0.6   | 0.6    | 0.6                  | 109 | 0.671             | 0.000*    | 0.943    | 0.094     | 0.001                  | 0.007                  | 0.005                   | 0.012                  | 0.014                  | 100.0   |
| 0.5      | $R_{\perp\perp}$ | sharp   | 0.6      | 0.6   | 0.8    | 0.8                  | 60  | 0.638             | 0.000*    | 0.936    | 0.001*    | 0.003                  | 0.003                  | 0.002                   | 0.048                  | 0.049                  | 99.3    |









Additional simulation results for design III when working assumptions A1 and A2 are satisfied

| $\delta$ | Response         | Formula | $r_{-1}$ | $r_1$ | $\rho$ | $\rho_{\text{size}}$ | $n$ | $1 - \hat{\beta}$ | $p$ value | Coverage | $p$ value | $\text{Cor}(R, Y_0^2)$ | $\text{Cor}(R, Y_1^2)$ | $\text{Cor}(R, Y_0 Y_1)$ | $\text{Cov}(Y_0, Y_2)$ | $\text{Cov}(Y_1, Y_2)$ | % Valid |
|----------|------------------|---------|----------|-------|--------|----------------------|-----|-------------------|-----------|----------|-----------|------------------------|------------------------|--------------------------|------------------------|------------------------|---------|
| 0.5      | $R_{\perp\perp}$ | sharp   | 0.4      | 0.6   | 0.6    | 0.6                  | 95  | 0.809             | 0.904     | 0.936    | 0.001*    | -0.004                 | 0.002                  | 0.003                    | 0.003                  | 0.001                  | 100.0   |
| 0.5      | $R_{\perp\perp}$ | sharp   | 0.4      | 0.6   | 0.8    | 0.8                  | 53  | 0.815             | 0.983     | 0.924    | 0.000*    | 0.005                  | 0.006                  | 0.006                    | 0.072                  | 0.079                  | 99.2    |
| 0.5      | $R_{\perp\perp}$ | sharp   | 0.6      | 0.4   | 0.3    | 0.3                  | 147 | 0.807             | 0.825     | 0.945    | 0.180     | -0.004                 | 0.002                  | -0.002                   | -0.021                 | 0.002                  | 100.0   |
| 0.5      | $R_{\perp\perp}$ | sharp   | 0.6      | 0.4   | 0.6    | 0.6                  | 102 | 0.812             | 0.953     | 0.946    | 0.276     | 0.001                  | 0.002                  | 0.002                    | 0.014                  | 0.008                  | 100.0   |
| 0.5      | $R_{\perp\perp}$ | sharp   | 0.6      | 0.4   | 0.8    | 0.8                  | 57  | 0.809             | 0.904     | 0.936    | 0.001*    | -0.006                 | -0.004                 | -0.005                   | -0.004                 | -0.002                 | 100.0   |
| 0.5      | $R_{\perp\perp}$ | sharp   | 0.6      | 0.6   | 0.3    | 0.3                  | 136 | 0.802             | 0.615     | 0.947    | 0.503     | 0.004                  | 0.005                  | 0.005                    | 0.021                  | 0.034                  | 100.0   |
| 0.5      | $R_{\perp\perp}$ | sharp   | 0.6      | 0.6   | 0.6    | 0.6                  | 95  | 0.809             | 0.904     | 0.943    | 0.094     | -0.005                 | -0.005                 | -0.004                   | -0.005                 | -0.011                 | 100.0   |
| 0.5      | $R_{\perp\perp}$ | sharp   | 0.6      | 0.6   | 0.8    | 0.8                  | 53  | 0.826             | 1.000     | 0.932    | 0.000*    | 0.001                  | 0.008                  | 0.003                    | 0.062                  | 0.077                  | 99.2    |











Additional simulation results for design III when working assumption A1(a) is violated: responders' end-of-study variance is 25% below the appropriate lower bound.

| $\delta$ | Response | Formula | $r_{-1}$ | $r_1$ | $\rho$ | $\rho_{\text{size}}$ | $n$ | $1 - \hat{\beta}$ | $p$ value | Coverage | $p$ value | Cor( $R, Y_0^2$ ) | Cor( $R, Y_1^2$ ) | Cor( $R, Y_0 Y_1$ ) | Cov( $Y_0, Y_2$ ) | Cov( $Y_1, Y_2$ ) | % Valid |
|----------|----------|---------|----------|-------|--------|----------------------|-----|-------------------|-----------|----------|-----------|-------------------|-------------------|---------------------|-------------------|-------------------|---------|
| 0.5      | $R_+$    | cons.   | 0.4      | 0.4   | 0.8    | 0.8                  | 59  | 0.845             | 1.000     | 0.935    | 0.000*    | 0.052             | 0.081             | 0.072               | -0.091            | -0.109            | 100.0   |
| 0.5      | $R_+$    | cons.   | 0.4      | 0.6   | 0.0    | 0.0                  | 151 | 0.776             | 0.001*    | 0.943    | 0.071     | -0.002            | 0.012             | 0.003               | -1.076            | -1.442            | 100.0   |
| 0.5      | $R_+$    | cons.   | 0.4      | 0.6   | 0.3    | 0.3                  | 138 | 0.797             | 0.348     | 0.942    | 0.049*    | 0.001             | 0.011             | 0.004               | 0.011             | 0.025             | 100.0   |
| 0.5      | $R_+$    | cons.   | 0.4      | 0.6   | 0.6    | 0.6                  | 97  | 0.821             | 0.998     | 0.937    | 0.002*    | 0.004             | 0.013             | 0.007               | 0.007             | 0.017             | 100.0   |
| 0.5      | $R_+$    | cons.   | 0.4      | 0.6   | 0.8    | 0.8                  | 55  | 0.839             | 1.000     | 0.937    | 0.002*    | 0.013             | 0.019             | 0.016               | 0.045             | 0.054             | 99.3    |
| 0.5      | $R_+$    | cons.   | 0.6      | 0.4   | 0.0    | 0.0                  | 164 | 0.777             | 0.001*    | 0.947    | 0.402     | 0.001             | 0.012             | 0.007               | -2.377            | -1.452            | 100.0   |
| 0.5      | $R_+$    | cons.   | 0.6      | 0.4   | 0.3    | 0.3                  | 149 | 0.802             | 0.632     | 0.948    | 0.615     | 0.002             | 0.011             | 0.007               | -0.010            | -0.040            | 100.0   |
| 0.5      | $R_+$    | cons.   | 0.6      | 0.4   | 0.6    | 0.6                  | 105 | 0.814             | 0.977     | 0.941    | 0.033*    | 0.007             | 0.011             | 0.010               | -0.025            | -0.043            | 100.0   |
| 0.5      | $R_+$    | cons.   | 0.6      | 0.4   | 0.8    | 0.8                  | 59  | 0.852             | 1.000     | 0.932    | 0.000*    | 0.009             | 0.012             | 0.012               | -0.043            | -0.048            | 100.0   |
| 0.5      | $R_+$    | cons.   | 0.6      | 0.6   | 0.0    | 0.0                  | 151 | 0.778             | 0.001*    | 0.938    | 0.003*    | -0.002            | -0.060            | 0.002               | -0.675            | -2.581            | 100.0   |
| 0.5      | $R_+$    | cons.   | 0.6      | 0.6   | 0.3    | 0.3                  | 138 | 0.800             | 0.489     | 0.941    | 0.026*    | -0.004            | -0.062            | -0.025              | 0.032             | 0.093             | 100.0   |
| 0.5      | $R_+$    | cons.   | 0.6      | 0.6   | 0.6    | 0.6                  | 97  | 0.826             | 1.000     | 0.934    | 0.000*    | -0.025            | -0.060            | -0.044              | 0.040             | 0.081             | 100.0   |
| 0.5      | $R_+$    | cons.   | 0.6      | 0.6   | 0.8    | 0.8                  | 55  | 0.837             | 1.000     | 0.935    | 0.000*    | -0.039            | -0.060            | -0.053              | 0.087             | 0.113             | 99.4    |
| 0.5      | $R_+$    | sharp   | 0.4      | 0.4   | 0.3    | 0.3                  | 147 | 0.787             | 0.044*    | 0.943    | 0.094     | 0.009             | 0.079             | 0.033               | -0.021            | -0.089            | 100.0   |
| 0.5      | $R_+$    | sharp   | 0.4      | 0.4   | 0.6    | 0.6                  | 102 | 0.807             | 0.825     | 0.942    | 0.040*    | 0.028             | 0.081             | 0.060               | -0.052            | -0.097            | 100.0   |
| 0.5      | $R_+$    | sharp   | 0.4      | 0.4   | 0.8    | 0.8                  | 57  | 0.823             | 0.999     | 0.934    | 0.000*    | 0.049             | 0.083             | 0.073               | -0.084            | -0.101            | 100.0   |
| 0.5      | $R_+$    | sharp   | 0.4      | 0.6   | 0.3    | 0.3                  | 136 | 0.791             | 0.114     | 0.938    | 0.004*    | 0.007             | 0.009             | 0.005               | -0.013            | 0.037             | 100.0   |
| 0.5      | $R_+$    | sharp   | 0.4      | 0.6   | 0.6    | 0.6                  | 95  | 0.817             | 0.990     | 0.941    | 0.032*    | 0.008             | 0.013             | 0.013               | 0.018             | 0.032             | 100.0   |
| 0.5      | $R_+$    | sharp   | 0.4      | 0.6   | 0.8    | 0.8                  | 53  | 0.829             | 1.000     | 0.933    | 0.000*    | 0.012             | 0.014             | 0.014               | 0.053             | 0.055             | 99.0    |
| 0.5      | $R_+$    | sharp   | 0.6      | 0.4   | 0.3    | 0.3                  | 147 | 0.791             | 0.105     | 0.938    | 0.004*    | 0.001             | 0.010             | 0.007               | -0.020            | -0.027            | 100.0   |
| 0.5      | $R_+$    | sharp   | 0.6      | 0.4   | 0.6    | 0.6                  | 102 | 0.808             | 0.858     | 0.943    | 0.071     | 0.005             | 0.013             | 0.008               | -0.015            | -0.032            | 100.0   |
| 0.5      | $R_+$    | sharp   | 0.6      | 0.4   | 0.8    | 0.8                  | 57  | 0.831             | 1.000     | 0.937    | 0.002*    | 0.005             | 0.013             | 0.013               | -0.030            | -0.031            | 100.0   |
| 0.5      | $R_+$    | sharp   | 0.6      | 0.6   | 0.3    | 0.3                  | 136 | 0.785             | 0.024*    | 0.934    | 0.000*    | -0.006            | -0.062            | -0.024              | -0.003            | 0.095             | 100.0   |
| 0.5      | $R_+$    | sharp   | 0.6      | 0.6   | 0.6    | 0.6                  | 95  | 0.808             | 0.867     | 0.944    | 0.111     | -0.017            | -0.059            | -0.042              | 0.051             | 0.096             | 100.0   |
| 0.5      | $R_+$    | sharp   | 0.6      | 0.6   | 0.8    | 0.8                  | 53  | 0.827             | 1.000     | 0.935    | 0.000*    | -0.036            | -0.059            | -0.051              | 0.101             | 0.117             | 99.0    |
| 0.5      | $R_-$    | cons.   | 0.4      | 0.4   | 0.0    | 0.0                  | 164 | 0.787             | 0.040*    | 0.945    | 0.241     | -0.002            | 0.080             | -0.008              | -0.646            | -0.612            | 100.0   |
| 0.5      | $R_-$    | cons.   | 0.4      | 0.4   | 0.3    | 0.3                  | 149 | 0.796             | 0.315     | 0.937    | 0.001*    | 0.007             | 0.081             | 0.032               | -0.024            | -0.101            | 100.0   |
| 0.5      | $R_-$    | cons.   | 0.4      | 0.4   | 0.6    | 0.6                  | 105 | 0.798             | 0.382     | 0.937    | 0.002*    | 0.027             | 0.080             | 0.056               | -0.059            | -0.107            | 100.0   |
| 0.5      | $R_-$    | cons.   | 0.4      | 0.6   | 0.0    | 0.0                  | 151 | 0.789             | 0.064     | 0.947    | 0.402     | 0.003             | 0.009             | -0.003              | -1.578            | -1.141            | 100.0   |
| 0.5      | $R_-$    | cons.   | 0.4      | 0.6   | 0.3    | 0.3                  | 138 | 0.786             | 0.030*    | 0.942    | 0.059     | -0.003            | 0.010             | 0.006               | 0.007             | 0.016             | 100.0   |
| 0.5      | $R_-$    | cons.   | 0.4      | 0.6   | 0.6    | 0.6                  | 97  | 0.776             | 0.001*    | 0.945    | 0.180     | 0.004             | 0.008             | 0.007               | 0.019             | 0.022             | 100.0   |
| 0.5      | $R_-$    | cons.   | 0.6      | 0.4   | 0.0    | 0.0                  | 164 | 0.789             | 0.076     | 0.941    | 0.021*    | -0.001            | 0.013             | -0.008              | -0.620            | -1.134            | 100.0   |
| 0.5      | $R_-$    | cons.   | 0.6      | 0.4   | 0.3    | 0.3                  | 149 | 0.798             | 0.399     | 0.945    | 0.241     | -0.002            | 0.012             | 0.003               | 0.001             | -0.027            | 100.0   |
| 0.5      | $R_-$    | cons.   | 0.6      | 0.4   | 0.6    | 0.6                  | 105 | 0.786             | 0.033*    | 0.935    | 0.000*    | 0.003             | 0.011             | 0.009               | -0.023            | -0.042            | 100.0   |
| 0.5      | $R_-$    | cons.   | 0.6      | 0.4   | 0.8    | 0.8                  | 59  | 0.785             | 0.019*    | 0.924    | 0.000*    | 0.013             | 0.009             | 0.012               | -0.015            | -0.031            | 100.0   |
| 0.5      | $R_-$    | cons.   | 0.6      | 0.6   | 0.0    | 0.0                  | 151 | 0.783             | 0.010*    | 0.943    | 0.086     | 0.004             | -0.062            | -0.004              | -1.064            | -0.964            | 100.0   |
| 0.5      | $R_-$    | cons.   | 0.6      | 0.6   | 0.3    | 0.3                  | 138 | 0.785             | 0.022*    | 0.944    | 0.154     | -0.006            | -0.061            | -0.025              | 0.046             | 0.102             | 100.0   |
| 0.5      | $R_-$    | cons.   | 0.6      | 0.6   | 0.6    | 0.6                  | 97  | 0.781             | 0.005*    | 0.942    | 0.040*    | -0.024            | -0.065            | -0.044              | 0.055             | 0.088             | 100.0   |
| 0.5      | $R_-$    | sharp   | 0.4      | 0.4   | 0.3    | 0.3                  | 147 | 0.797             | 0.331     | 0.949    | 0.737     | 0.009             | 0.078             | 0.030               | -0.026            | -0.104            | 100.0   |
| 0.5      | $R_-$    | sharp   | 0.4      | 0.4   | 0.6    | 0.6                  | 102 | 0.777             | 0.001*    | 0.941    | 0.026*    | 0.030             | 0.078             | 0.057               | -0.051            | -0.102            | 100.0   |
| 0.5      | $R_-$    | sharp   | 0.4      | 0.6   | 0.3    | 0.3                  | 136 | 0.783             | 0.010*    | 0.943    | 0.086     | 0.002             | 0.011             | 0.004               | -0.004            | 0.002             | 100.0   |
| 0.5      | $R_-$    | sharp   | 0.4      | 0.6   | 0.6    | 0.6                  | 95  | 0.760             | 0.000*    | 0.935    | 0.000*    | 0.002             | 0.007             | 0.006               | 0.002             | 0.029             | 100.0   |
| 0.5      | $R_-$    | sharp   | 0.6      | 0.4   | 0.3    | 0.3                  | 147 | 0.795             | 0.268     | 0.947    | 0.402     | 0.003             | 0.008             | 0.002               | -0.005            | -0.038            | 100.0   |
| 0.5      | $R_-$    | sharp   | 0.6      | 0.4   | 0.6    | 0.6                  | 102 | 0.782             | 0.007*    | 0.939    | 0.006*    | 0.008             | 0.011             | 0.010               | -0.018            | -0.035            | 100.0   |
| 0.5      | $R_-$    | sharp   | 0.6      | 0.4   | 0.8    | 0.8                  | 57  | 0.775             | 0.000*    | 0.937    | 0.001*    | 0.004             | 0.009             | 0.008               | -0.025            | -0.031            | 100.0   |

Continued on next page

Additional simulation results for design III when working assumption A1(a) is violated: responders' end-of-study variance is 25% below the appropriate lower bound.

| $\delta$ | Response         | Formula | $r_{-1}$ | $r_1$ | $\rho$ | $\rho_{size}$ | $n$ | $1 - \hat{\beta}$ | $p$ value | Coverage | $p$ value | $Cor(R, Y_0^2)$ | $Cor(R, Y_1^2)$ | $Cor(R, Y_0 Y_1)$ | $Cov(Y_0, Y_2)$ | $Cov(Y_1, Y_2)$ | % Valid |
|----------|------------------|---------|----------|-------|--------|---------------|-----|-------------------|-----------|----------|-----------|-----------------|-----------------|-------------------|-----------------|-----------------|---------|
| 0.5      | $R_-$            | sharp   | 0.6      | 0.6   | 0.3    | 0.3           | 136 | 0.772             | 0.000*    | 0.939    | 0.009*    | -0.007          | -0.060          | -0.024            | 0.006           | 0.069           | 100.0   |
| 0.5      | $R_-$            | sharp   | 0.6      | 0.6   | 0.6    | 0.6           | 95  | 0.762             | 0.000*    | 0.937    | 0.002*    | -0.022          | -0.062          | -0.047            | 0.035           | 0.082           | 100.0   |
| 0.5      | $R_{\perp\perp}$ | cons.   | 0.4      | 0.4   | 0.0    | 0.0           | 164 | 0.787             | 0.044*    | 0.950    | 0.933     | -0.004          | 0.002           | -0.001            | -0.033          | -0.738          | 100.0   |
| 0.5      | $R_{\perp\perp}$ | cons.   | 0.4      | 0.4   | 0.0    | 0.0           | 164 | 0.780             | 0.003*    | 0.943    | 0.071     | 0.003           | -0.001          | -0.003            | 1.791           | -1.610          | 100.0   |
| 0.5      | $R_{\perp\perp}$ | cons.   | 0.4      | 0.4   | 0.3    | 0.3           | 149 | 0.804             | 0.699     | 0.942    | 0.059     | -0.005          | 0.003           | 0.002             | -0.021          | 0.009           | 100.0   |
| 0.5      | $R_{\perp\perp}$ | cons.   | 0.4      | 0.4   | 0.3    | 0.3           | 149 | 0.798             | 0.382     | 0.943    | 0.086     | 0.003           | -0.002          | 0.002             | -0.231          | -0.229          | 100.0   |
| 0.5      | $R_{\perp\perp}$ | cons.   | 0.4      | 0.4   | 0.6    | 0.6           | 105 | 0.791             | 0.114     | 0.940    | 0.013*    | -0.006          | -0.004          | -0.003            | -0.008          | -0.005          | 100.0   |
| 0.5      | $R_{\perp\perp}$ | cons.   | 0.4      | 0.4   | 0.6    | 0.6           | 105 | 0.807             | 0.848     | 0.938    | 0.003*    | -0.001          | 0.001           | -0.001            | -0.136          | -0.134          | 100.0   |
| 0.5      | $R_{\perp\perp}$ | cons.   | 0.4      | 0.4   | 0.8    | 0.8           | 59  | 0.831             | 1.000     | 0.931    | 0.000*    | 0.005           | 0.003           | 0.004             | 0.008           | 0.004           | 100.0   |
| 0.5      | $R_{\perp\perp}$ | cons.   | 0.4      | 0.4   | 0.8    | 0.8           | 59  | 0.836             | 1.000     | 0.942    | 0.049*    | 0.005           | 0.005           | 0.006             | -0.052          | -0.057          | 100.0   |
| 0.5      | $R_{\perp\perp}$ | cons.   | 0.4      | 0.6   | 0.0    | 0.0           | 151 | 0.769             | 0.000*    | 0.932    | 0.000*    | -0.002          | 0.003           | 0.002             | -1.059          | 1.022           | 100.0   |
| 0.5      | $R_{\perp\perp}$ | cons.   | 0.4      | 0.6   | 0.0    | 0.0           | 151 | 0.794             | 0.225     | 0.939    | 0.009*    | 0.005           | -0.003          | 0.002             | 2.029           | 1.715           | 100.0   |
| 0.5      | $R_{\perp\perp}$ | cons.   | 0.4      | 0.6   | 0.3    | 0.3           | 138 | 0.775             | 0.000*    | 0.948    | 0.557     | -0.003          | 0.004           | 0.005             | -0.008          | -0.012          | 100.0   |
| 0.5      | $R_{\perp\perp}$ | cons.   | 0.4      | 0.6   | 0.3    | 0.3           | 138 | 0.811             | 0.943     | 0.947    | 0.503     | 0.003           | -0.001          | -0.001            | -0.255          | -0.243          | 100.0   |
| 0.5      | $R_{\perp\perp}$ | cons.   | 0.4      | 0.6   | 0.6    | 0.6           | 97  | 0.786             | 0.029*    | 0.942    | 0.040*    | -0.001          | -0.003          | -0.002            | 0.003           | 0.007           | 100.0   |
| 0.5      | $R_{\perp\perp}$ | cons.   | 0.4      | 0.6   | 0.6    | 0.6           | 97  | 0.818             | 0.995     | 0.941    | 0.032*    | -0.004          | -0.004          | -0.008            | -0.150          | -0.149          | 100.0   |
| 0.5      | $R_{\perp\perp}$ | cons.   | 0.4      | 0.6   | 0.8    | 0.8           | 55  | 0.787             | 0.041*    | 0.939    | 0.007*    | 0.008           | 0.010           | 0.008             | 0.065           | 0.071           | 99.4    |
| 0.5      | $R_{\perp\perp}$ | cons.   | 0.4      | 0.6   | 0.8    | 0.8           | 55  | 0.832             | 1.000     | 0.936    | 0.001*    | -0.002          | 0.003           | 0.001             | -0.109          | -0.105          | 99.2    |
| 0.5      | $R_{\perp\perp}$ | cons.   | 0.6      | 0.4   | 0.0    | 0.0           | 164 | 0.785             | 0.022*    | 0.952    | 0.706     | 0.002           | -0.002          | 0.003             | -0.004          | 0.309           | 100.0   |
| 0.5      | $R_{\perp\perp}$ | cons.   | 0.6      | 0.4   | 0.0    | 0.0           | 164 | 0.741             | 0.000*    | 0.944    | 0.154     | -0.003          | 0.002           | -0.001            | 2.201           | 0.962           | 100.0   |
| 0.5      | $R_{\perp\perp}$ | cons.   | 0.6      | 0.4   | 0.3    | 0.3           | 149 | 0.798             | 0.382     | 0.938    | 0.004*    | -0.001          | -0.003          | -0.001            | -0.010          | 0.011           | 100.0   |
| 0.5      | $R_{\perp\perp}$ | cons.   | 0.6      | 0.4   | 0.3    | 0.3           | 149 | 0.766             | 0.000*    | 0.945    | 0.180     | 0.003           | 0.001           | 0.003             | -0.290          | -0.291          | 100.0   |
| 0.5      | $R_{\perp\perp}$ | cons.   | 0.6      | 0.4   | 0.6    | 0.6           | 105 | 0.809             | 0.904     | 0.946    | 0.357     | -0.004          | 0.001           | -0.002            | -0.015          | -0.006          | 100.0   |
| 0.5      | $R_{\perp\perp}$ | cons.   | 0.6      | 0.4   | 0.6    | 0.6           | 105 | 0.795             | 0.239     | 0.943    | 0.094     | 0.002           | 0.005           | 0.006             | -0.167          | -0.167          | 100.0   |
| 0.5      | $R_{\perp\perp}$ | cons.   | 0.6      | 0.4   | 0.8    | 0.8           | 59  | 0.826             | 1.000     | 0.930    | 0.000*    | 0.002           | 0.003           | -0.002            | -0.001          | -0.004          | 100.0   |
| 0.5      | $R_{\perp\perp}$ | cons.   | 0.6      | 0.4   | 0.8    | 0.8           | 59  | 0.797             | 0.344     | 0.928    | 0.000*    | 0.001           | 0.001           | 0.002             | -0.078          | -0.078          | 100.0   |
| 0.5      | $R_{\perp\perp}$ | cons.   | 0.6      | 0.6   | 0.0    | 0.0           | 151 | 0.767             | 0.000*    | 0.940    | 0.017*    | 0.002           | 0.003           | 0.003             | -0.981          | 0.462           | 100.0   |
| 0.5      | $R_{\perp\perp}$ | cons.   | 0.6      | 0.6   | 0.0    | 0.0           | 151 | 0.780             | 0.003*    | 0.945    | 0.180     | 0.002           | 0.004           | -0.005            | 3.002           | 1.579           | 100.0   |
| 0.5      | $R_{\perp\perp}$ | cons.   | 0.6      | 0.6   | 0.3    | 0.3           | 138 | 0.779             | 0.002*    | 0.946    | 0.357     | 0.003           | 0.005           | 0.005             | 0.007           | -0.010          | 100.0   |
| 0.5      | $R_{\perp\perp}$ | cons.   | 0.6      | 0.6   | 0.3    | 0.3           | 138 | 0.781             | 0.005*    | 0.945    | 0.209     | 0.002           | 0.005           | 0.002             | -0.327          | -0.313          | 100.0   |
| 0.5      | $R_{\perp\perp}$ | cons.   | 0.6      | 0.6   | 0.6    | 0.6           | 97  | 0.786             | 0.029*    | 0.935    | 0.000*    | 0.002           | 0.004           | 0.002             | 0.005           | 0.009           | 100.0   |
| 0.5      | $R_{\perp\perp}$ | cons.   | 0.6      | 0.6   | 0.6    | 0.6           | 97  | 0.811             | 0.937     | 0.947    | 0.402     | 0.004           | 0.005           | -0.003            | -0.184          | -0.188          | 100.0   |
| 0.5      | $R_{\perp\perp}$ | cons.   | 0.6      | 0.6   | 0.8    | 0.8           | 55  | 0.799             | 0.442     | 0.936    | 0.001*    | 0.004           | -0.002          | 0.001             | 0.055           | 0.054           | 99.4    |
| 0.5      | $R_{\perp\perp}$ | cons.   | 0.6      | 0.6   | 0.8    | 0.8           | 55  | 0.816             | 0.988     | 0.944    | 0.110     | 0.003           | 0.004           | 0.002             | -0.149          | -0.147          | 99.2    |
| 0.5      | $R_{\perp\perp}$ | sharp   | 0.4      | 0.4   | 0.3    | 0.3           | 147 | 0.801             | 0.544     | 0.946    | 0.357     | -0.003          | 0.003           | 0.001             | -0.238          | -0.243          | 100.0   |
| 0.5      | $R_{\perp\perp}$ | sharp   | 0.4      | 0.4   | 0.3    | 0.3           | 147 | 0.781             | 0.005*    | 0.941    | 0.026*    | -0.003          | -0.003          | -0.002            | -0.023          | -0.003          | 100.0   |
| 0.5      | $R_{\perp\perp}$ | sharp   | 0.4      | 0.4   | 0.6    | 0.6           | 102 | 0.797             | 0.348     | 0.937    | 0.002*    | 0.005           | -0.002          | 0.002             | -0.130          | -0.132          | 100.0   |
| 0.5      | $R_{\perp\perp}$ | sharp   | 0.4      | 0.4   | 0.6    | 0.6           | 102 | 0.801             | 0.580     | 0.947    | 0.451     | 0.003           | 0.002           | 0.001             | 0.006           | 0.006           | 100.0   |
| 0.5      | $R_{\perp\perp}$ | sharp   | 0.4      | 0.4   | 0.8    | 0.8           | 57  | 0.809             | 0.885     | 0.936    | 0.001*    | 0.008           | -0.003          | 0.006             | -0.068          | -0.068          | 100.0   |
| 0.5      | $R_{\perp\perp}$ | sharp   | 0.4      | 0.4   | 0.8    | 0.8           | 57  | 0.796             | 0.299     | 0.933    | 0.000*    | -0.007          | -0.005          | -0.007            | -0.008          | -0.008          | 100.0   |
| 0.5      | $R_{\perp\perp}$ | sharp   | 0.4      | 0.6   | 0.3    | 0.3           | 136 | 0.805             | 0.774     | 0.946    | 0.276     | -0.004          | 0.003           | 0.002             | -0.252          | -0.243          | 100.0   |
| 0.5      | $R_{\perp\perp}$ | sharp   | 0.4      | 0.6   | 0.3    | 0.3           | 136 | 0.768             | 0.000*    | 0.943    | 0.094     | 0.003           | 0.002           | -0.002            | 0.003           | 0.028           | 100.0   |
| 0.5      | $R_{\perp\perp}$ | sharp   | 0.4      | 0.6   | 0.6    | 0.6           | 95  | 0.823             | 0.999     | 0.941    | 0.033*    | -0.003          | -0.001          | -0.002            | -0.151          | -0.150          | 100.0   |
| 0.5      | $R_{\perp\perp}$ | sharp   | 0.4      | 0.6   | 0.6    | 0.6           | 95  | 0.792             | 0.142     | 0.938    | 0.003*    | -0.004          | 0.002           | 0.003             | 0.004           | 0.001           | 100.0   |
| 0.5      | $R_{\perp\perp}$ | sharp   | 0.4      | 0.6   | 0.8    | 0.8           | 53  | 0.812             | 0.955     | 0.935    | 0.000*    | 0.004           | -0.005          | -0.002            | -0.101          | -0.112          | 99.2    |

Continued on next page

Additional simulation results for design III when working assumption A1(a) is violated: responders' end-of-study variance is 25% below the appropriate lower bound.

| $\delta$ | Response        | Formula | $r_{-1}$ | $r_1$ | $\rho$ | $\rho_{\text{size}}$ | $n$ | $1 - \hat{\beta}$ | $p$ value | Coverage | $p$ value | $\text{Cor}(R, Y_0^2)$ | $\text{Cor}(R, Y_1^2)$ | $\text{Cor}(R, Y_0Y_1)$ | $\text{Cov}(Y_0, Y_2)$ | $\text{Cov}(Y_1, Y_2)$ | % Valid |
|----------|-----------------|---------|----------|-------|--------|----------------------|-----|-------------------|-----------|----------|-----------|------------------------|------------------------|-------------------------|------------------------|------------------------|---------|
| 0.5      | $R_{\perp}$     | sharp   | 0.4      | 0.6   | 0.8    | 0.8                  | 53  | 0.780             | 0.004*    | 0.922    | 0.000*    | 0.005                  | 0.006                  | 0.006                   | 0.072                  | 0.080                  | 99.2    |
| 0.5      | $R_{\perp}$     | sharp   | 0.6      | 0.4   | 0.3    | 0.3                  | 147 | 0.757             | 0.000*    | 0.946    | 0.315     | 0.003                  | 0.002                  | 0.003                   | -0.304                 | -0.302                 | 100.0   |
| 0.5      | $R_{\perp}$     | sharp   | 0.6      | 0.4   | 0.3    | 0.3                  | 147 | 0.791             | 0.114     | 0.941    | 0.021*    | -0.004                 | 0.002                  | -0.002                  | -0.022                 | 0.002                  | 100.0   |
| 0.5      | $R_{\perp}$     | sharp   | 0.6      | 0.4   | 0.6    | 0.6                  | 102 | 0.787             | 0.040*    | 0.939    | 0.006*    | 0.002                  | 0.005                  | 0.003                   | -0.174                 | -0.171                 | 100.0   |
| 0.5      | $R_{\perp}$     | sharp   | 0.6      | 0.4   | 0.6    | 0.6                  | 102 | 0.798             | 0.417     | 0.947    | 0.503     | 0.001                  | 0.002                  | 0.002                   | 0.013                  | 0.007                  | 100.0   |
| 0.5      | $R_{\perp}$     | sharp   | 0.6      | 0.4   | 0.8    | 0.8                  | 57  | 0.806             | 0.785     | 0.942    | 0.040*    | -0.007                 | -0.006                 | -0.008                  | -0.088                 | -0.090                 | 100.0   |
| 0.5      | $R_{\perp}$     | sharp   | 0.6      | 0.4   | 0.8    | 0.8                  | 57  | 0.794             | 0.199     | 0.930    | 0.000*    | -0.006                 | -0.004                 | -0.005                  | -0.005                 | -0.002                 | 100.0   |
| 0.5      | $R_{\perp}$     | sharp   | 0.6      | 0.6   | 0.3    | 0.3                  | 136 | 0.778             | 0.002*    | 0.952    | 0.645     | 0.004                  | 0.003                  | 0.002                   | -0.318                 | -0.306                 | 100.0   |
| 0.5      | $R_{\perp}$     | sharp   | 0.6      | 0.6   | 0.3    | 0.3                  | 136 | 0.774             | 0.000*    | 0.941    | 0.026*    | 0.004                  | 0.005                  | 0.005                   | 0.022                  | 0.038                  | 100.0   |
| 0.5      | $R_{\perp}$     | sharp   | 0.6      | 0.6   | 0.6    | 0.6                  | 95  | 0.799             | 0.471     | 0.944    | 0.111     | 0.001                  | 0.003                  | 0.001                   | -0.192                 | -0.186                 | 100.0   |
| 0.5      | $R_{\perp}$     | sharp   | 0.6      | 0.6   | 0.6    | 0.6                  | 95  | 0.787             | 0.044*    | 0.938    | 0.004*    | -0.005                 | -0.005                 | -0.004                  | -0.005                 | -0.011                 | 100.0   |
| 0.5      | $R_{\perp}$     | sharp   | 0.6      | 0.6   | 0.8    | 0.8                  | 53  | 0.795             | 0.255     | 0.930    | 0.000*    | 0.006                  | 0.004                  | 0.004                   | -0.143                 | -0.144                 | 99.2    |
| 0.5      | $R_{\perp}$     | sharp   | 0.6      | 0.6   | 0.8    | 0.8                  | 53  | 0.778             | 0.002*    | 0.931    | 0.000*    | 0.001                  | 0.008                  | 0.003                   | 0.061                  | 0.078                  | 99.2    |
| 0.5      | $R_+^{1\kappa}$ | cons.   | 0.3      | 0.4   | 0.0    | 0.0                  | 164 | 0.791             | 0.105     | 0.949    | 0.801     | 0.000                  | 0.235                  | -0.008                  | -0.374                 | -1.166                 | 100.0   |
| 0.5      | $R_+^{1\kappa}$ | cons.   | 0.3      | 0.4   | 0.3    | 0.3                  | 149 | 0.797             | 0.331     | 0.945    | 0.241     | 0.018                  | 0.232                  | 0.091                   | -0.070                 | -0.360                 | 100.0   |
| 0.5      | $R_+^{1\kappa}$ | cons.   | 0.5      | 0.6   | 0.0    | 0.0                  | 151 | 0.769             | 0.000*    | 0.945    | 0.209     | -0.002                 | -0.056                 | -0.002                  | -2.185                 | -0.793                 | 100.0   |
| 0.5      | $R_+^{1\kappa}$ | cons.   | 0.5      | 0.6   | 0.3    | 0.3                  | 138 | 0.786             | 0.030*    | 0.952    | 0.645     | -0.004                 | -0.054                 | -0.023                  | 0.044                  | 0.214                  | 100.0   |
| 0.5      | $R_+^{1\kappa}$ | sharp   | 0.3      | 0.4   | 0.3    | 0.3                  | 147 | 0.779             | 0.002*    | 0.944    | 0.154     | 0.019                  | 0.232                  | 0.091                   | -0.057                 | -0.366                 | 100.0   |
| 0.5      | $R_+^{1\kappa}$ | sharp   | 0.5      | 0.6   | 0.3    | 0.3                  | 136 | 0.780             | 0.004*    | 0.943    | 0.071     | -0.007                 | -0.054                 | -0.022                  | 0.008                  | 0.201                  | 100.0   |
| 0.5      | $R_-^{1\kappa}$ | cons.   | 0.3      | 0.4   | 0.0    | 0.0                  | 164 | 0.809             | 0.896     | 0.941    | 0.026*    | -0.002                 | -0.055                 | -0.007                  | 1.033                  | 2.637                  | 100.0   |
| 0.5      | $R_-^{1\kappa}$ | cons.   | 0.3      | 0.4   | 0.3    | 0.3                  | 149 | 0.806             | 0.813     | 0.946    | 0.276     | -0.005                 | -0.055                 | -0.024                  | 0.021                  | 0.174                  | 100.0   |
| 0.5      | $R_-^{1\kappa}$ | cons.   | 0.3      | 0.4   | 0.6    | 0.6                  | 105 | 0.807             | 0.837     | 0.938    | 0.004*    | -0.019                 | -0.055                 | -0.040                  | 0.054                  | 0.186                  | 100.0   |
| 0.5      | $R_-^{1\kappa}$ | cons.   | 0.5      | 0.6   | 0.0    | 0.0                  | 151 | 0.760             | 0.000*    | 0.933    | 0.000*    | 0.007                  | 0.231                  | -0.003                  | -2.762                 | 0.963                  | 100.0   |
| 0.5      | $R_-^{1\kappa}$ | cons.   | 0.5      | 0.6   | 0.3    | 0.3                  | 138 | 0.778             | 0.002*    | 0.929    | 0.000*    | 0.023                  | 0.236                  | 0.095                   | -0.035                 | -0.343                 | 100.0   |
| 0.5      | $R_-^{1\kappa}$ | cons.   | 0.5      | 0.6   | 0.6    | 0.6                  | 97  | 0.762             | 0.000*    | 0.923    | 0.000*    | 0.084                  | 0.238                  | 0.171                   | -0.136                 | -0.350                 | 100.0   |
| 0.5      | $R_-^{1\kappa}$ | sharp   | 0.3      | 0.4   | 0.3    | 0.3                  | 147 | 0.798             | 0.417     | 0.944    | 0.111     | -0.007                 | -0.053                 | -0.024                  | 0.021                  | 0.190                  | 100.0   |
| 0.5      | $R_-^{1\kappa}$ | sharp   | 0.3      | 0.4   | 0.6    | 0.6                  | 102 | 0.805             | 0.774     | 0.945    | 0.209     | -0.022                 | -0.058                 | -0.043                  | 0.068                  | 0.190                  | 100.0   |
| 0.5      | $R_-^{1\kappa}$ | sharp   | 0.5      | 0.6   | 0.3    | 0.3                  | 136 | 0.763             | 0.000*    | 0.927    | 0.000*    | 0.021                  | 0.235                  | 0.091                   | -0.048                 | -0.339                 | 100.0   |
| 0.5      | $R_-^{1\kappa}$ | sharp   | 0.5      | 0.6   | 0.6    | 0.6                  | 95  | 0.763             | 0.000*    | 0.923    | 0.000*    | 0.082                  | 0.236                  | 0.168                   | -0.141                 | -0.349                 | 100.0   |
| 0.5      | $R_+^{2\kappa}$ | cons.   | 0.4      | 0.4   | 0.0    | 0.0                  | 164 | 0.780             | 0.003*    | 0.944    | 0.154     | -0.002                 | 0.147                  | -0.008                  | -0.412                 | -1.578                 | 100.0   |
| 0.5      | $R_+^{2\kappa}$ | cons.   | 0.4      | 0.4   | 0.3    | 0.3                  | 149 | 0.786             | 0.033*    | 0.937    | 0.002*    | 0.013                  | 0.148                  | 0.057                   | -0.053                 | -0.273                 | 100.0   |
| 0.5      | $R_+^{2\kappa}$ | cons.   | 0.4      | 0.4   | 0.6    | 0.6                  | 105 | 0.803             | 0.666     | 0.940    | 0.017*    | 0.049                  | 0.151                  | 0.108                   | -0.122                 | -0.267                 | 100.0   |
| 0.5      | $R_+^{2\kappa}$ | cons.   | 0.4      | 0.6   | 0.0    | 0.0                  | 151 | 0.774             | 0.000*    | 0.944    | 0.111     | 0.003                  | -0.003                 | -0.002                  | -1.656                 | -5.558                 | 100.0   |
| 0.5      | $R_+^{2\kappa}$ | cons.   | 0.4      | 0.6   | 0.3    | 0.3                  | 138 | 0.787             | 0.044*    | 0.946    | 0.315     | 0.003                  | 0.003                  | 0.003                   | 0.047                  | 0.128                  | 100.0   |
| 0.5      | $R_+^{2\kappa}$ | cons.   | 0.6      | 0.4   | 0.0    | 0.0                  | 164 | 0.780             | 0.004*    | 0.947    | 0.503     | -0.003                 | 0.004                  | -0.008                  | 0.602                  | -1.241                 | 100.0   |
| 0.5      | $R_+^{2\kappa}$ | cons.   | 0.6      | 0.4   | 0.3    | 0.3                  | 149 | 0.791             | 0.123     | 0.941    | 0.033*    | -0.001                 | -0.009                 | -0.002                  | -0.024                 | -0.107                 | 100.0   |
| 0.5      | $R_+^{2\kappa}$ | cons.   | 0.6      | 0.4   | 0.6    | 0.6                  | 105 | 0.807             | 0.848     | 0.937    | 0.001*    | -0.002                 | 0.006                  | -0.006                  | -0.046                 | -0.093                 | 100.0   |
| 0.5      | $R_+^{2\kappa}$ | cons.   | 0.6      | 0.6   | 0.0    | 0.0                  | 151 | 0.770             | 0.000*    | 0.943    | 0.071     | -0.003                 | -0.151                 | -0.002                  | -1.963                 | -0.832                 | 100.0   |
| 0.5      | $R_+^{2\kappa}$ | cons.   | 0.6      | 0.6   | 0.3    | 0.3                  | 138 | 0.774             | 0.000*    | 0.938    | 0.004*    | -0.013                 | -0.150                 | -0.061                  | 0.069                  | 0.406                  | 100.0   |
| 0.5      | $R_+^{2\kappa}$ | cons.   | 0.6      | 0.6   | 0.6    | 0.6                  | 97  | 0.759             | 0.000*    | 0.937    | 0.002*    | -0.051                 | -0.152                 | -0.108                  | 0.128                  | 0.374                  | 100.0   |
| 0.5      | $R_+^{2\kappa}$ | sharp   | 0.4      | 0.4   | 0.3    | 0.3                  | 147 | 0.783             | 0.011*    | 0.946    | 0.315     | 0.012                  | 0.147                  | 0.057                   | -0.048                 | -0.278                 | 100.0   |
| 0.5      | $R_+^{2\kappa}$ | sharp   | 0.4      | 0.4   | 0.6    | 0.6                  | 102 | 0.784             | 0.018*    | 0.941    | 0.026*    | 0.052                  | 0.147                  | 0.106                   | -0.104                 | -0.257                 | 100.0   |
| 0.5      | $R_+^{2\kappa}$ | sharp   | 0.4      | 0.6   | 0.3    | 0.3                  | 136 | 0.776             | 0.001*    | 0.944    | 0.154     | -0.003                 | 0.004                  | -0.001                  | 0.001                  | 0.117                  | 100.0   |
| 0.5      | $R_+^{2\kappa}$ | sharp   | 0.6      | 0.4   | 0.3    | 0.3                  | 147 | 0.781             | 0.005*    | 0.946    | 0.315     | -0.001                 | -0.001                 | -0.002                  | -0.009                 | -0.121                 | 100.0   |
| 0.5      | $R_+^{2\kappa}$ | sharp   | 0.6      | 0.4   | 0.6    | 0.6                  | 102 | 0.782             | 0.008*    | 0.933    | 0.000*    | -0.004                 | -0.003                 | -0.006                  | -0.030                 | -0.090                 | 100.0   |

Continued on next page

Additional simulation results for design III when working assumption A1(a) is violated: responders' end-of-study variance is 25% below the appropriate lower bound.

| $\delta$ | Response        | Formula | $r_{-1}$ | $r_1$ | $\rho$ | $\rho_{\text{size}}$ | $n$ | $1 - \hat{\beta}$ | $p$ value | Coverage | $p$ value | $\text{Cor}(R, Y_0^2)$ | $\text{Cor}(R, Y_1^2)$ | $\text{Cor}(R, Y_0Y_1)$ | $\text{Cov}(Y_0, Y_2)$ | $\text{Cov}(Y_1, Y_2)$ | % Valid |
|----------|-----------------|---------|----------|-------|--------|----------------------|-----|-------------------|-----------|----------|-----------|------------------------|------------------------|-------------------------|------------------------|------------------------|---------|
| 0.5      | $R_+^{2\kappa}$ | sharp   | 0.6      | 0.6   | 0.3    | 0.3                  | 136 | 0.779             | 0.002*    | 0.946    | 0.276     | -0.017                 | -0.147                 | -0.061                  | 0.032                  | 0.372                  | 100.0   |
| 0.5      | $R_+^{2\kappa}$ | sharp   | 0.6      | 0.6   | 0.6    | 0.6                  | 95  | 0.753             | 0.000*    | 0.940    | 0.013*    | -0.056                 | -0.153                 | -0.114                  | 0.121                  | 0.360                  | 100.0   |
| 0.5      | $R_-^{2\kappa}$ | cons.   | 0.4      | 0.4   | 0.0    | 0.0                  | 164 | 0.793             | 0.163     | 0.936    | 0.001*    | -0.002                 | -0.146                 | -0.007                  | 0.974                  | 0.696                  | 100.0   |
| 0.5      | $R_-^{2\kappa}$ | cons.   | 0.4      | 0.4   | 0.3    | 0.3                  | 149 | 0.778             | 0.002*    | 0.933    | 0.000*    | -0.012                 | -0.151                 | -0.061                  | 0.030                  | 0.354                  | 100.0   |
| 0.5      | $R_-^{2\kappa}$ | cons.   | 0.4      | 0.4   | 0.6    | 0.6                  | 105 | 0.760             | 0.000*    | 0.934    | 0.000*    | -0.052                 | -0.152                 | -0.110                  | 0.105                  | 0.355                  | 100.0   |
| 0.5      | $R_-^{2\kappa}$ | cons.   | 0.4      | 0.6   | 0.0    | 0.0                  | 151 | 0.757             | 0.000*    | 0.944    | 0.132     | -0.004                 | -0.004                 | -0.002                  | -1.478                 | 0.619                  | 100.0   |
| 0.5      | $R_-^{2\kappa}$ | cons.   | 0.4      | 0.6   | 0.3    | 0.3                  | 138 | 0.774             | 0.000*    | 0.941    | 0.026*    | 0.003                  | 0.002                  | 0.003                   | 0.005                  | -0.091                 | 100.0   |
| 0.5      | $R_-^{2\kappa}$ | cons.   | 0.6      | 0.4   | 0.0    | 0.0                  | 164 | 0.795             | 0.253     | 0.937    | 0.002*    | -0.001                 | 0.006                  | -0.008                  | 0.910                  | 13.855                 | 100.0   |
| 0.5      | $R_-^{2\kappa}$ | cons.   | 0.6      | 0.4   | 0.3    | 0.3                  | 149 | 0.802             | 0.632     | 0.942    | 0.059     | 0.003                  | -0.004                 | -0.004                  | 0.011                  | 0.101                  | 100.0   |
| 0.5      | $R_-^{2\kappa}$ | cons.   | 0.6      | 0.4   | 0.6    | 0.6                  | 105 | 0.814             | 0.977     | 0.944    | 0.111     | -0.002                 | -0.001                 | -0.001                  | 0.022                  | 0.103                  | 100.0   |
| 0.5      | $R_-^{2\kappa}$ | cons.   | 0.6      | 0.6   | 0.0    | 0.0                  | 151 | 0.774             | 0.000*    | 0.932    | 0.000*    | 0.005                  | 0.147                  | -0.002                  | -3.255                 | -0.195                 | 100.0   |
| 0.5      | $R_-^{2\kappa}$ | cons.   | 0.6      | 0.6   | 0.3    | 0.3                  | 138 | 0.797             | 0.348     | 0.933    | 0.000*    | 0.017                  | 0.150                  | 0.061                   | -0.027                 | -0.266                 | 100.0   |
| 0.5      | $R_-^{2\kappa}$ | cons.   | 0.6      | 0.6   | 0.6    | 0.6                  | 97  | 0.775             | 0.000*    | 0.934    | 0.000*    | 0.052                  | 0.150                  | 0.109                   | -0.097                 | -0.263                 | 100.0   |
| 0.5      | $R_-^{2\kappa}$ | sharp   | 0.4      | 0.4   | 0.3    | 0.3                  | 147 | 0.774             | 0.000*    | 0.929    | 0.000*    | -0.014                 | -0.148                 | -0.061                  | 0.036                  | 0.344                  | 100.0   |
| 0.5      | $R_-^{2\kappa}$ | sharp   | 0.4      | 0.4   | 0.6    | 0.6                  | 102 | 0.763             | 0.000*    | 0.939    | 0.009*    | -0.055                 | -0.153                 | -0.112                  | 0.113                  | 0.354                  | 100.0   |
| 0.5      | $R_-^{2\kappa}$ | sharp   | 0.4      | 0.6   | 0.3    | 0.3                  | 136 | 0.773             | 0.000*    | 0.944    | 0.154     | -0.003                 | 0.001                  | -0.002                  | -0.001                 | -0.084                 | 100.0   |
| 0.5      | $R_-^{2\kappa}$ | sharp   | 0.6      | 0.4   | 0.3    | 0.3                  | 147 | 0.797             | 0.348     | 0.940    | 0.017*    | -0.002                 | -0.000                 | -0.003                  | 0.004                  | 0.102                  | 100.0   |
| 0.5      | $R_-^{2\kappa}$ | sharp   | 0.6      | 0.4   | 0.6    | 0.6                  | 102 | 0.801             | 0.544     | 0.944    | 0.111     | -0.003                 | -0.006                 | -0.004                  | 0.033                  | 0.106                  | 100.0   |
| 0.5      | $R_-^{2\kappa}$ | sharp   | 0.6      | 0.6   | 0.3    | 0.3                  | 136 | 0.781             | 0.006*    | 0.926    | 0.000*    | 0.013                  | 0.149                  | 0.058                   | -0.028                 | -0.254                 | 100.0   |
| 0.5      | $R_-^{2\kappa}$ | sharp   | 0.6      | 0.6   | 0.6    | 0.6                  | 95  | 0.765             | 0.000*    | 0.925    | 0.000*    | 0.052                  | 0.150                  | 0.107                   | -0.105                 | -0.256                 | 100.0   |

**Table S16:** Additional simulation results for design III when working assumption A1(b) is violated: response is highly correlated with  $(Y_1^{(d)} - \mu_1^{(d)})^2$

| $\delta$ | Response | Formula | $r_{-1}$ | $r_1$ | $\rho$ | $\rho_{size}$ | $n$ | $1 - \hat{\beta}$ | $p$ value | Coverage | $p$ value | $Cor(R, Y_0^2)$ | $Cor(R, Y_1^2)$ | $Cor(R, Y_0Y_1)$ | $Cov(Y_0, Y_2)$ | $Cov(Y_1, Y_2)$ | % Valid |
|----------|----------|---------|----------|-------|--------|---------------|-----|-------------------|-----------|----------|-----------|-----------------|-----------------|------------------|-----------------|-----------------|---------|
| 0.3      | $R_+^2$  | cons.   | 0.4      | 0.4   | 0.0    | 0.0           | 454 | 0.794             | 0.199     | 0.939    | 0.007*    | -0.002          | 0.690           | -0.001           | 1.385           | 9.046           | 100.0   |
| 0.3      | $R_+^2$  | cons.   | 0.4      | 0.4   | 0.3    | 0.3           | 413 | 0.800             | 0.525     | 0.946    | 0.357     | 0.063           | 0.691           | 0.280            | 0.779           | 9.116           | 100.0   |
| 0.3      | $R_+^2$  | cons.   | 0.4      | 0.4   | 0.6    | 0.6           | 291 | 0.783             | 0.011*    | 0.940    | 0.017*    | 0.246           | 0.695           | 0.502            | 2.234           | 9.138           | 100.0   |
| 0.3      | $R_+^2$  | cons.   | 0.4      | 0.6   | 0.0    | 0.0           | 419 | 0.772             | 0.000*    | 0.951    | 0.900     | -0.003          | 0.612           | 0.003            | -2.752          | 3.360           | 100.0   |
| 0.3      | $R_+^2$  | cons.   | 0.4      | 0.6   | 0.3    | 0.3           | 381 | 0.779             | 0.002*    | 0.957    | 0.079     | 0.057           | 0.613           | 0.247            | 0.710           | 12.870          | 100.0   |
| 0.3      | $R_+^2$  | cons.   | 0.4      | 0.6   | 0.6    | 0.6           | 268 | 0.752             | 0.000*    | 0.946    | 0.315     | 0.219           | 0.616           | 0.445            | 2.099           | 12.764          | 100.0   |
| 0.3      | $R_+^2$  | cons.   | 0.6      | 0.4   | 0.0    | 0.0           | 454 | 0.799             | 0.471     | 0.944    | 0.132     | -0.001          | 0.615           | -0.000           | 0.587           | -1.191          | 100.0   |
| 0.3      | $R_+^2$  | cons.   | 0.6      | 0.4   | 0.3    | 0.3           | 413 | 0.783             | 0.011*    | 0.945    | 0.180     | 0.056           | 0.615           | 0.247            | 0.732           | 10.358          | 100.0   |
| 0.3      | $R_+^2$  | cons.   | 0.6      | 0.4   | 0.6    | 0.6           | 291 | 0.788             | 0.053     | 0.946    | 0.276     | 0.219           | 0.616           | 0.448            | 2.179           | 10.573          | 100.0   |
| 0.3      | $R_+^2$  | cons.   | 0.6      | 0.6   | 0.0    | 0.0           | 419 | 0.769             | 0.000*    | 0.945    | 0.180     | -0.002          | 0.534           | 0.002            | -1.445          | 0.793           | 100.0   |
| 0.3      | $R_+^2$  | cons.   | 0.6      | 0.6   | 0.3    | 0.3           | 381 | 0.791             | 0.123     | 0.947    | 0.503     | 0.050           | 0.535           | 0.216            | 0.663           | 17.472          | 100.0   |
| 0.3      | $R_+^2$  | cons.   | 0.6      | 0.6   | 0.6    | 0.6           | 268 | 0.750             | 0.000*    | 0.950    | 0.967     | 0.190           | 0.538           | 0.388            | 2.019           | 17.264          | 100.0   |
| 0.3      | $R_+^2$  | sharp   | 0.4      | 0.4   | 0.3    | 0.3           | 408 | 0.793             | 0.163     | 0.946    | 0.276     | 0.062           | 0.691           | 0.279            | 0.782           | 9.321           | 100.0   |
| 0.3      | $R_+^2$  | sharp   | 0.4      | 0.4   | 0.6    | 0.6           | 281 | 0.772             | 0.000*    | 0.946    | 0.276     | 0.245           | 0.695           | 0.502            | 2.225           | 9.085           | 100.0   |
| 0.3      | $R_+^2$  | sharp   | 0.4      | 0.6   | 0.3    | 0.3           | 378 | 0.779             | 0.002*    | 0.952    | 0.645     | 0.054           | 0.615           | 0.247            | 0.662           | 12.708          | 100.0   |
| 0.3      | $R_+^2$  | sharp   | 0.4      | 0.6   | 0.6    | 0.6           | 262 | 0.767             | 0.000*    | 0.946    | 0.276     | 0.218           | 0.617           | 0.447            | 2.109           | 12.628          | 100.0   |
| 0.3      | $R_+^2$  | sharp   | 0.6      | 0.4   | 0.3    | 0.3           | 408 | 0.788             | 0.053     | 0.947    | 0.451     | 0.054           | 0.616           | 0.247            | 0.737           | 10.850          | 100.0   |
| 0.3      | $R_+^2$  | sharp   | 0.6      | 0.4   | 0.6    | 0.6           | 281 | 0.777             | 0.001*    | 0.948    | 0.615     | 0.217           | 0.619           | 0.446            | 2.159           | 10.366          | 100.0   |
| 0.3      | $R_+^2$  | sharp   | 0.6      | 0.6   | 0.3    | 0.3           | 378 | 0.776             | 0.001*    | 0.947    | 0.503     | 0.047           | 0.536           | 0.216            | 0.609           | 16.798          | 100.0   |
| 0.3      | $R_+^2$  | sharp   | 0.6      | 0.6   | 0.6    | 0.6           | 262 | 0.772             | 0.000*    | 0.946    | 0.315     | 0.192           | 0.539           | 0.390            | 2.039           | 16.862          | 100.0   |
| 0.3      | $R_+^2$  | cons.   | 0.4      | 0.4   | 0.0    | 0.0           | 454 | 0.745             | 0.000*    | 0.910    | 0.000*    | -0.001          | -0.424          | 0.001            | -0.675          | -1.690          | 100.0   |
| 0.3      | $R_-^2$  | cons.   | 0.4      | 0.4   | 0.3    | 0.3           | 413 | 0.711             | 0.000*    | 0.912    | 0.000*    | -0.039          | -0.423          | -0.170           | 0.145           | 1.683           | 100.0   |
| 0.3      | $R_-^2$  | cons.   | 0.4      | 0.4   | 0.6    | 0.6           | 291 | 0.670             | 0.000*    | 0.914    | 0.000*    | -0.152          | -0.427          | -0.309           | 0.422           | 1.669           | 100.0   |
| 0.3      | $R_-^2$  | cons.   | 0.4      | 0.4   | 0.8    | 0.8           | 164 | 0.632             | 0.000*    | 0.908    | 0.000*    | -0.271          | -0.428          | -0.377           | 0.808           | 1.736           | 99.9    |
| 0.3      | $R_-^2$  | cons.   | 0.4      | 0.6   | 0.0    | 0.0           | 419 | 0.657             | 0.000*    | 0.904    | 0.000*    | 0.002           | -0.354          | -0.002           | 1.276           | -1.301          | 100.0   |
| 0.3      | $R_-^2$  | cons.   | 0.4      | 0.6   | 0.3    | 0.3           | 381 | 0.641             | 0.000*    | 0.900    | 0.000*    | -0.032          | -0.356          | -0.144           | 0.098           | 1.025           | 100.0   |
| 0.3      | $R_-^2$  | cons.   | 0.4      | 0.6   | 0.6    | 0.6           | 268 | 0.607             | 0.000*    | 0.910    | 0.000*    | -0.126          | -0.356          | -0.257           | 0.295           | 1.094           | 100.0   |
| 0.3      | $R_-^2$  | cons.   | 0.4      | 0.6   | 0.8    | 0.8           | 151 | 0.602             | 0.000*    | 0.895    | 0.000*    | -0.228          | -0.360          | -0.318           | 0.555           | 1.094           | 100.0   |
| 0.3      | $R_-^2$  | cons.   | 0.6      | 0.4   | 0.0    | 0.0           | 454 | 0.858             | 1.000     | 0.942    | 0.049*    | 0.001           | -0.359          | 0.001            | 0.073           | -2.210          | 100.0   |
| 0.3      | $R_-^2$  | cons.   | 0.6      | 0.4   | 0.3    | 0.3           | 413 | 0.850             | 1.000     | 0.943    | 0.086     | -0.032          | -0.354          | -0.142           | 0.128           | 1.393           | 100.0   |
| 0.3      | $R_-^2$  | cons.   | 0.6      | 0.4   | 0.6    | 0.6           | 291 | 0.827             | 1.000     | 0.945    | 0.209     | -0.127          | -0.357          | -0.258           | 0.357           | 1.357           | 100.0   |
| 0.3      | $R_-^2$  | cons.   | 0.6      | 0.4   | 0.8    | 0.8           | 164 | 0.846             | 1.000     | 0.944    | 0.154     | -0.228          | -0.359          | -0.317           | 0.697           | 1.435           | 99.9    |
| 0.3      | $R_-^2$  | cons.   | 0.6      | 0.6   | 0.0    | 0.0           | 419 | 0.767             | 0.000*    | 0.938    | 0.003*    | 0.002           | -0.285          | -0.002           | 0.878           | -2.839          | 100.0   |
| 0.3      | $R_-^2$  | cons.   | 0.6      | 0.6   | 0.3    | 0.3           | 381 | 0.781             | 0.005*    | 0.943    | 0.094     | -0.026          | -0.287          | -0.117           | 0.073           | 0.831           | 100.0   |
| 0.3      | $R_-^2$  | cons.   | 0.6      | 0.6   | 0.6    | 0.6           | 268 | 0.779             | 0.003*    | 0.942    | 0.040*    | -0.102          | -0.288          | -0.208           | 0.234           | 0.859           | 100.0   |
| 0.3      | $R_-^2$  | cons.   | 0.6      | 0.6   | 0.8    | 0.8           | 151 | 0.813             | 0.969     | 0.934    | 0.000*    | -0.184          | -0.292          | -0.257           | 0.452           | 0.856           | 100.0   |
| 0.3      | $R_-^2$  | sharp   | 0.4      | 0.4   | 0.3    | 0.3           | 408 | 0.715             | 0.000*    | 0.907    | 0.000*    | -0.039          | -0.424          | -0.173           | 0.148           | 1.682           | 100.0   |
| 0.3      | $R_-^2$  | sharp   | 0.4      | 0.4   | 0.6    | 0.6           | 281 | 0.662             | 0.000*    | 0.918    | 0.000*    | -0.150          | -0.425          | -0.307           | 0.407           | 1.659           | 100.0   |
| 0.3      | $R_-^2$  | sharp   | 0.4      | 0.4   | 0.8    | 0.8           | 156 | 0.620             | 0.000*    | 0.921    | 0.000*    | -0.272          | -0.429          | -0.378           | 0.802           | 1.689           | 99.9    |
| 0.3      | $R_-^2$  | sharp   | 0.4      | 0.6   | 0.3    | 0.3           | 378 | 0.632             | 0.000*    | 0.903    | 0.000*    | -0.033          | -0.359          | -0.145           | 0.110           | 1.002           | 100.0   |
| 0.3      | $R_-^2$  | sharp   | 0.4      | 0.6   | 0.6    | 0.6           | 262 | 0.610             | 0.000*    | 0.902    | 0.000*    | -0.126          | -0.358          | -0.259           | 0.301           | 1.083           | 100.0   |
| 0.3      | $R_-^2$  | sharp   | 0.4      | 0.6   | 0.8    | 0.8           | 146 | 0.580             | 0.000*    | 0.897    | 0.000*    | -0.229          | -0.365          | -0.321           | 0.560           | 1.097           | 100.0   |
| 0.3      | $R_-^2$  | sharp   | 0.6      | 0.4   | 0.3    | 0.3           | 408 | 0.840             | 1.000     | 0.946    | 0.276     | -0.031          | -0.356          | -0.144           | 0.130           | 1.370           | 100.0   |
| 0.3      | $R_-^2$  | sharp   | 0.6      | 0.4   | 0.6    | 0.6           | 281 | 0.835             | 1.000     | 0.947    | 0.402     | -0.126          | -0.358          | -0.257           | 0.350           | 1.366           | 100.0   |
| 0.3      | $R_-^2$  | sharp   | 0.6      | 0.4   | 0.8    | 0.8           | 156 | 0.827             | 1.000     | 0.950    | 1.000     | -0.228          | -0.361          | -0.318           | 0.669           | 1.369           | 99.9    |

Continued on next page

Additional simulation results for design III when working assumption A1(b) is violated: response is highly correlated  
 with  $(Y_1^{(d)} - \mu_1^{(d)})^2$

| $\delta$ | Response | Formula | $r_{-1}$ | $r_1$ | $\rho$ | $\rho_{\text{size}}$ | $n$ | $1 - \hat{\beta}$ | $p$ value | Coverage | $p$ value | $\text{Cor}(R, Y_0^2)$ | $\text{Cor}(R, Y_1^2)$ | $\text{Cor}(R, Y_0 Y_1)$ | $\text{Cov}(Y_0, Y_2)$ | $\text{Cov}(Y_1, Y_2)$ | % Valid |
|----------|----------|---------|----------|-------|--------|----------------------|-----|-------------------|-----------|----------|-----------|------------------------|------------------------|--------------------------|------------------------|------------------------|---------|
| 0.3      | $R_-^2$  | sharp   | 0.6      | 0.6   | 0.3    | 0.3                  | 378 | 0.771             | 0.000*    | 0.943    | 0.086     | -0.027                 | -0.290                 | -0.117                   | 0.091                  | 0.779                  | 100.0   |
| 0.3      | $R_-^2$  | sharp   | 0.6      | 0.6   | 0.6    | 0.6                  | 262 | 0.785             | 0.024*    | 0.936    | 0.000*    | -0.103                 | -0.290                 | -0.209                   | 0.245                  | 0.847                  | 100.0   |
| 0.3      | $R_-^2$  | sharp   | 0.6      | 0.6   | 0.8    | 0.8                  | 146 | 0.796             | 0.299     | 0.931    | 0.000*    | -0.185                 | -0.296                 | -0.261                   | 0.456                  | 0.859                  | 100.0   |
| 0.5      | $R_+^2$  | cons.   | 0.4      | 0.4   | 0.0    | 0.0                  | 164 | 0.802             | 0.632     | 0.943    | 0.094     | 0.002                  | 0.705                  | 0.001                    | 3.495                  | 8.686                  | 100.0   |
| 0.5      | $R_+^2$  | cons.   | 0.4      | 0.4   | 0.3    | 0.3                  | 149 | 0.791             | 0.123     | 0.938    | 0.003*    | 0.062                  | 0.706                  | 0.281                    | 0.781                  | 9.259                  | 100.0   |
| 0.5      | $R_+^2$  | cons.   | 0.4      | 0.4   | 0.6    | 0.6                  | 105 | 0.798             | 0.417     | 0.949    | 0.737     | 0.246                  | 0.714                  | 0.511                    | 2.209                  | 9.064                  | 100.0   |
| 0.5      | $R_+^2$  | cons.   | 0.4      | 0.6   | 0.0    | 0.0                  | 151 | 0.777             | 0.001*    | 0.938    | 0.004*    | 0.002                  | 0.624                  | -0.005                   | -5.192                 | 12.786                 | 100.0   |
| 0.5      | $R_+^2$  | cons.   | 0.4      | 0.6   | 0.3    | 0.3                  | 138 | 0.782             | 0.008*    | 0.949    | 0.867     | 0.055                  | 0.628                  | 0.246                    | 0.668                  | 13.033                 | 100.0   |
| 0.5      | $R_+^2$  | cons.   | 0.4      | 0.6   | 0.6    | 0.6                  | 97  | 0.763             | 0.000*    | 0.937    | 0.002*    | 0.221                  | 0.640                  | 0.457                    | 2.069                  | 12.763                 | 100.0   |
| 0.5      | $R_+^2$  | cons.   | 0.6      | 0.4   | 0.0    | 0.0                  | 164 | 0.800             | 0.489     | 0.949    | 0.737     | 0.002                  | 0.627                  | 0.001                    | 6.563                  | 1.787                  | 100.0   |
| 0.5      | $R_+^2$  | cons.   | 0.6      | 0.4   | 0.3    | 0.3                  | 149 | 0.797             | 0.365     | 0.942    | 0.059     | 0.054                  | 0.629                  | 0.251                    | 0.726                  | 10.614                 | 100.0   |
| 0.5      | $R_+^2$  | cons.   | 0.6      | 0.4   | 0.6    | 0.6                  | 105 | 0.792             | 0.152     | 0.938    | 0.003*    | 0.220                  | 0.636                  | 0.457                    | 2.167                  | 10.544                 | 100.0   |
| 0.5      | $R_+^2$  | cons.   | 0.6      | 0.6   | 0.0    | 0.0                  | 151 | 0.772             | 0.000*    | 0.944    | 0.154     | 0.003                  | 0.545                  | -0.004                   | 1.260                  | 1.910                  | 100.0   |
| 0.5      | $R_+^2$  | cons.   | 0.6      | 0.6   | 0.3    | 0.3                  | 138 | 0.782             | 0.007*    | 0.945    | 0.241     | 0.049                  | 0.549                  | 0.216                    | 0.639                  | 17.582                 | 100.0   |
| 0.5      | $R_+^2$  | cons.   | 0.6      | 0.6   | 0.6    | 0.6                  | 97  | 0.762             | 0.000*    | 0.942    | 0.040*    | 0.194                  | 0.557                  | 0.399                    | 1.993                  | 16.909                 | 100.0   |
| 0.5      | $R_+^2$  | sharp   | 0.4      | 0.4   | 0.3    | 0.3                  | 147 | 0.796             | 0.283     | 0.942    | 0.059     | 0.063                  | 0.705                  | 0.275                    | 0.778                  | 8.834                  | 100.0   |
| 0.5      | $R_+^2$  | sharp   | 0.4      | 0.4   | 0.6    | 0.6                  | 102 | 0.767             | 0.000*    | 0.941    | 0.033*    | 0.246                  | 0.716                  | 0.510                    | 2.267                  | 9.141                  | 100.0   |
| 0.5      | $R_+^2$  | sharp   | 0.4      | 0.6   | 0.3    | 0.3                  | 136 | 0.769             | 0.000*    | 0.935    | 0.000*    | 0.055                  | 0.627                  | 0.252                    | 0.741                  | 13.252                 | 100.0   |
| 0.5      | $R_+^2$  | sharp   | 0.4      | 0.6   | 0.6    | 0.6                  | 95  | 0.754             | 0.000*    | 0.942    | 0.049*    | 0.221                  | 0.638                  | 0.455                    | 2.104                  | 12.837                 | 100.0   |
| 0.5      | $R_+^2$  | sharp   | 0.6      | 0.4   | 0.3    | 0.3                  | 147 | 0.789             | 0.070     | 0.944    | 0.111     | 0.055                  | 0.625                  | 0.245                    | 0.726                  | 9.964                  | 100.0   |
| 0.5      | $R_+^2$  | sharp   | 0.6      | 0.4   | 0.6    | 0.6                  | 102 | 0.774             | 0.000*    | 0.947    | 0.451     | 0.218                  | 0.636                  | 0.453                    | 2.184                  | 10.380                 | 100.0   |
| 0.5      | $R_+^2$  | sharp   | 0.6      | 0.6   | 0.3    | 0.3                  | 136 | 0.776             | 0.001*    | 0.940    | 0.012*    | 0.049                  | 0.548                  | 0.220                    | 0.664                  | 18.486                 | 100.0   |
| 0.5      | $R_+^2$  | sharp   | 0.6      | 0.6   | 0.6    | 0.6                  | 95  | 0.751             | 0.000*    | 0.940    | 0.017*    | 0.194                  | 0.558                  | 0.398                    | 2.037                  | 17.229                 | 100.0   |
| 0.5      | $R_-^2$  | cons.   | 0.4      | 0.4   | 0.0    | 0.0                  | 164 | 0.797             | 0.341     | 0.927    | 0.000*    | -0.002                 | -0.432                 | 0.009                    | -1.575                 | 7.417                  | 99.9    |
| 0.5      | $R_-^2$  | cons.   | 0.4      | 0.4   | 0.3    | 0.3                  | 149 | 0.761             | 0.000*    | 0.919    | 0.000*    | -0.035                 | -0.433                 | -0.169                   | 0.142                  | 1.880                  | 99.9    |
| 0.5      | $R_-^2$  | cons.   | 0.4      | 0.4   | 0.6    | 0.6                  | 105 | 0.724             | 0.000*    | 0.927    | 0.000*    | -0.148                 | -0.437                 | -0.311                   | 0.490                  | 1.796                  | 99.1    |
| 0.5      | $R_-^2$  | cons.   | 0.4      | 0.4   | 0.8    | 0.8                  | 59  | 0.732             | 0.000*    | 0.923    | 0.000*    | -0.283                 | -0.449                 | -0.397                   | 1.542                  | 2.732                  | 90.5    |
| 0.5      | $R_-^2$  | cons.   | 0.4      | 0.6   | 0.0    | 0.0                  | 151 | 0.723             | 0.000*    | 0.922    | 0.000*    | -0.005                 | -0.359                 | 0.004                    | -0.264                 | 16.451                 | 100.0   |
| 0.5      | $R_-^2$  | cons.   | 0.4      | 0.6   | 0.3    | 0.3                  | 138 | 0.720             | 0.000*    | 0.924    | 0.000*    | -0.035                 | -0.365                 | -0.144                   | 0.069                  | 1.035                  | 100.0   |
| 0.5      | $R_-^2$  | cons.   | 0.4      | 0.6   | 0.6    | 0.6                  | 97  | 0.720             | 0.000*    | 0.920    | 0.000*    | -0.128                 | -0.368                 | -0.264                   | 0.304                  | 1.114                  | 99.8    |
| 0.5      | $R_-^2$  | cons.   | 0.4      | 0.6   | 0.8    | 0.8                  | 55  | 0.736             | 0.000*    | 0.921    | 0.000*    | -0.230                 | -0.378                 | -0.329                   | 0.778                  | 1.441                  | 96.3    |
| 0.5      | $R_-^2$  | cons.   | 0.6      | 0.4   | 0.0    | 0.0                  | 164 | 0.855             | 1.000     | 0.941    | 0.026*    | -0.002                 | -0.363                 | 0.009                    | -1.629                 | 3.913                  | 99.9    |
| 0.5      | $R_-^2$  | cons.   | 0.6      | 0.4   | 0.3    | 0.3                  | 149 | 0.841             | 1.000     | 0.937    | 0.001*    | -0.030                 | -0.365                 | -0.143                   | 0.120                  | 1.556                  | 99.9    |
| 0.5      | $R_-^2$  | cons.   | 0.6      | 0.4   | 0.6    | 0.6                  | 105 | 0.845             | 1.000     | 0.944    | 0.141     | -0.126                 | -0.369                 | -0.264                   | 0.421                  | 1.487                  | 99.1    |
| 0.5      | $R_-^2$  | cons.   | 0.6      | 0.4   | 0.8    | 0.8                  | 59  | 0.857             | 1.000     | 0.939    | 0.011*    | -0.238                 | -0.377                 | -0.333                   | 1.360                  | 2.285                  | 90.7    |
| 0.5      | $R_-^2$  | cons.   | 0.6      | 0.6   | 0.0    | 0.0                  | 151 | 0.787             | 0.036*    | 0.942    | 0.040*    | 0.004                  | -0.291                 | 0.003                    | 0.256                  | 2.821                  | 100.0   |
| 0.5      | $R_-^2$  | cons.   | 0.6      | 0.6   | 0.3    | 0.3                  | 138 | 0.795             | 0.250     | 0.941    | 0.026*    | -0.029                 | -0.295                 | -0.118                   | 0.063                  | 0.823                  | 100.0   |
| 0.5      | $R_-^2$  | cons.   | 0.6      | 0.6   | 0.6    | 0.6                  | 97  | 0.826             | 1.000     | 0.946    | 0.314     | -0.104                 | -0.299                 | -0.215                   | 0.232                  | 0.865                  | 99.9    |
| 0.5      | $R_-^2$  | cons.   | 0.6      | 0.6   | 0.8    | 0.8                  | 55  | 0.869             | 1.000     | 0.933    | 0.000*    | -0.189                 | -0.308                 | -0.269                   | 0.633                  | 1.121                  | 96.7    |
| 0.5      | $R_-^2$  | sharp   | 0.4      | 0.4   | 0.3    | 0.3                  | 147 | 0.780             | 0.004*    | 0.929    | 0.000*    | -0.037                 | -0.429                 | -0.167                   | 0.150                  | 1.882                  | 100.0   |
| 0.5      | $R_-^2$  | sharp   | 0.4      | 0.4   | 0.6    | 0.6                  | 102 | 0.723             | 0.000*    | 0.931    | 0.000*    | -0.152                 | -0.436                 | -0.313                   | 0.540                  | 1.858                  | 99.0    |
| 0.5      | $R_-^2$  | sharp   | 0.4      | 0.4   | 0.8    | 0.8                  | 57  | 0.699             | 0.000*    | 0.923    | 0.000*    | -0.276                 | -0.449                 | -0.391                   | 1.554                  | 2.950                  | 88.9    |
| 0.5      | $R_-^2$  | sharp   | 0.4      | 0.6   | 0.3    | 0.3                  | 136 | 0.691             | 0.000*    | 0.920    | 0.000*    | -0.032                 | -0.363                 | -0.144                   | 0.101                  | 1.052                  | 99.9    |
| 0.5      | $R_-^2$  | sharp   | 0.4      | 0.6   | 0.6    | 0.6                  | 95  | 0.722             | 0.000*    | 0.929    | 0.000*    | -0.125                 | -0.367                 | -0.259                   | 0.293                  | 1.120                  | 99.9    |
| 0.5      | $R_-^2$  | sharp   | 0.4      | 0.6   | 0.8    | 0.8                  | 53  | 0.709             | 0.000*    | 0.912    | 0.000*    | -0.233                 | -0.383                 | -0.333                   | 0.875                  | 1.495                  | 95.9    |

Continued on next page

Additional simulation results for design III when working assumption A1(b) is violated: response is highly correlated  
with  $(Y_1^{(d)} - \mu_1^{(d)})^2$

| $\delta$ | Response | Formula | $r_{-1}$ | $r_1$ | $\rho$ | $\rho_{\text{size}}$ | $n$ | $1 - \hat{\beta}$ | $p$ value | Coverage | $p$ value | $\text{Cor}(R, Y_0^2)$ | $\text{Cor}(R, Y_1^2)$ | $\text{Cor}(R, Y_0 Y_1)$ | $\text{Cov}(Y_0, Y_2)$ | $\text{Cov}(Y_1, Y_2)$ | % Valid |
|----------|----------|---------|----------|-------|--------|----------------------|-----|-------------------|-----------|----------|-----------|------------------------|------------------------|--------------------------|------------------------|------------------------|---------|
| 0.5      | $R_-^2$  | sharp   | 0.6      | 0.4   | 0.3    | 0.3                  | 147 | 0.846             | 1.000     | 0.939    | 0.009*    | -0.031                 | -0.361                 | -0.140                   | 0.143                  | 1.460                  | 100.0   |
| 0.5      | $R_-^2$  | sharp   | 0.6      | 0.4   | 0.6    | 0.6                  | 102 | 0.834             | 1.000     | 0.944    | 0.119     | -0.127                 | -0.366                 | -0.262                   | 0.473                  | 1.523                  | 99.0    |
| 0.5      | $R_-^2$  | sharp   | 0.6      | 0.4   | 0.8    | 0.8                  | 57  | 0.838             | 1.000     | 0.941    | 0.041*    | -0.232                 | -0.379                 | -0.330                   | 1.364                  | 2.415                  | 89.2    |
| 0.5      | $R_-^2$  | sharp   | 0.6      | 0.6   | 0.3    | 0.3                  | 136 | 0.782             | 0.008*    | 0.938    | 0.003*    | -0.027                 | -0.294                 | -0.116                   | 0.086                  | 0.832                  | 99.9    |
| 0.5      | $R_-^2$  | sharp   | 0.6      | 0.6   | 0.6    | 0.6                  | 95  | 0.821             | 0.999     | 0.946    | 0.276     | -0.102                 | -0.298                 | -0.211                   | 0.253                  | 0.888                  | 99.9    |
| 0.5      | $R_-^2$  | sharp   | 0.6      | 0.6   | 0.8    | 0.8                  | 53  | 0.852             | 1.000     | 0.930    | 0.000*    | -0.189                 | -0.310                 | -0.271                   | 0.704                  | 1.169                  | 96.4    |

**Table S17:** Additional simulation results for design III when working assumption A1(c) is violated.

| $\delta$ | Response         | Formula | $r_{-1}$ | $r_1$ | $\rho$ | $\rho_{\text{size}}$ | $n$ | $1 - \hat{\beta}$ | $p$ value | Coverage | $p$ value | $\text{Cor}(R, Y_0^2)$ | $\text{Cor}(R, Y_1^2)$ | $\text{Cor}(R, Y_0 Y_1)$ | $\text{Cov}(Y_0, Y_2)$ | $\text{Cov}(Y_1, Y_2)$ | % Valid |
|----------|------------------|---------|----------|-------|--------|----------------------|-----|-------------------|-----------|----------|-----------|------------------------|------------------------|--------------------------|------------------------|------------------------|---------|
| 0.3      | $R_{\perp\perp}$ | cons.   | 0.4      | 0.4   | 0.3    | 0.3                  | 413 | 0.800             | 0.477     | 0.953    | 0.314     | -0.002                 | -0.002                 | 0.001                    | 2.463                  | 2.493                  | 100.0   |
| 0.3      | $R_{\perp\perp}$ | cons.   | 0.4      | 0.4   | 0.6    | 0.6                  | 291 | 0.787             | 0.010*    | 0.943    | 0.035*    | -0.002                 | -0.002                 | -0.002                   | 1.081                  | 1.083                  | 100.0   |
| 0.3      | $R_{\perp\perp}$ | cons.   | 0.4      | 0.6   | 0.3    | 0.3                  | 381 | 0.789             | 0.028*    | 0.942    | 0.012*    | 0.001                  | -0.002                 | 0.002                    | 1.970                  | 1.946                  | 100.0   |
| 0.3      | $R_{\perp\perp}$ | cons.   | 0.4      | 0.6   | 0.6    | 0.6                  | 268 | 0.755             | 0.000*    | 0.948    | 0.475     | -0.001                 | -0.002                 | -0.001                   | 2.275                  | 2.280                  | 100.0   |
| 0.3      | $R_{\perp\perp}$ | cons.   | 0.6      | 0.4   | 0.3    | 0.3                  | 413 | 0.799             | 0.422     | 0.944    | 0.055     | -0.000                 | 0.000                  | -0.000                   | 2.194                  | 2.190                  | 100.0   |
| 0.3      | $R_{\perp\perp}$ | cons.   | 0.6      | 0.4   | 0.6    | 0.6                  | 291 | 0.784             | 0.002*    | 0.949    | 0.795     | -0.001                 | 0.001                  | 0.000                    | 1.550                  | 1.559                  | 100.0   |
| 0.3      | $R_{\perp\perp}$ | cons.   | 0.6      | 0.6   | 0.3    | 0.3                  | 381 | 0.795             | 0.213     | 0.953    | 0.417     | -0.001                 | -0.001                 | 0.001                    | 1.696                  | 1.684                  | 100.0   |
| 0.3      | $R_{\perp\perp}$ | cons.   | 0.6      | 0.6   | 0.6    | 0.6                  | 268 | 0.754             | 0.000*    | 0.944    | 0.055     | 0.001                  | -0.002                 | -0.000                   | 3.631                  | 3.619                  | 100.0   |
| 0.3      | $R_{\perp\perp}$ | sharp   | 0.4      | 0.4   | 0.3    | 0.3                  | 408 | 0.794             | 0.165     | 0.949    | 0.746     | -0.001                 | 0.001                  | -0.001                   | 2.465                  | 2.487                  | 100.0   |
| 0.3      | $R_{\perp\perp}$ | sharp   | 0.4      | 0.4   | 0.6    | 0.6                  | 281 | 0.780             | 0.000*    | 0.942    | 0.015*    | 0.003                  | -0.001                 | 0.000                    | 1.105                  | 1.103                  | 100.0   |
| 0.3      | $R_{\perp\perp}$ | sharp   | 0.4      | 0.6   | 0.3    | 0.3                  | 378 | 0.788             | 0.017*    | 0.948    | 0.559     | 0.002                  | -0.001                 | -0.001                   | 1.932                  | 1.923                  | 100.0   |
| 0.3      | $R_{\perp\perp}$ | sharp   | 0.4      | 0.6   | 0.6    | 0.6                  | 262 | 0.738             | 0.000*    | 0.945    | 0.119     | -0.001                 | -0.001                 | -0.001                   | 2.301                  | 2.278                  | 100.0   |
| 0.3      | $R_{\perp\perp}$ | sharp   | 0.6      | 0.4   | 0.3    | 0.3                  | 408 | 0.786             | 0.007*    | 0.947    | 0.364     | -0.001                 | -0.003                 | -0.001                   | 2.184                  | 2.234                  | 100.0   |
| 0.3      | $R_{\perp\perp}$ | sharp   | 0.6      | 0.4   | 0.6    | 0.6                  | 281 | 0.771             | 0.000*    | 0.946    | 0.153     | 0.001                  | 0.001                  | -0.001                   | 1.581                  | 1.575                  | 100.0   |
| 0.3      | $R_{\perp\perp}$ | sharp   | 0.6      | 0.6   | 0.3    | 0.3                  | 378 | 0.787             | 0.010*    | 0.944    | 0.048*    | 0.001                  | 0.000                  | 0.001                    | 1.679                  | 1.646                  | 100.0   |
| 0.3      | $R_{\perp\perp}$ | sharp   | 0.6      | 0.6   | 0.6    | 0.6                  | 262 | 0.739             | 0.000*    | 0.947    | 0.270     | 0.001                  | 0.002                  | 0.002                    | 3.673                  | 3.592                  | 100.0   |
| 0.5      | $R_{\perp\perp}$ | cons.   | 0.4      | 0.4   | 0.3    | 0.3                  | 149 | 0.805             | 0.797     | 0.945    | 0.085     | -0.001                 | -0.001                 | -0.001                   | 2.524                  | 2.579                  | 100.0   |
| 0.5      | $R_{\perp\perp}$ | cons.   | 0.4      | 0.4   | 0.6    | 0.6                  | 105 | 0.785             | 0.004*    | 0.937    | 0.000*    | -0.001                 | 0.001                  | -0.002                   | 1.102                  | 1.095                  | 100.0   |
| 0.5      | $R_{\perp\perp}$ | cons.   | 0.4      | 0.6   | 0.3    | 0.3                  | 138 | 0.788             | 0.017*    | 0.945    | 0.119     | 0.001                  | -0.001                 | -0.001                   | 1.894                  | 1.881                  | 100.0   |
| 0.5      | $R_{\perp\perp}$ | cons.   | 0.4      | 0.6   | 0.6    | 0.6                  | 97  | 0.759             | 0.000*    | 0.936    | 0.000*    | -0.003                 | -0.002                 | -0.003                   | 2.243                  | 2.270                  | 100.0   |
| 0.5      | $R_{\perp\perp}$ | cons.   | 0.6      | 0.4   | 0.3    | 0.3                  | 149 | 0.802             | 0.617     | 0.941    | 0.003*    | 0.002                  | 0.001                  | 0.001                    | 2.334                  | 2.318                  | 100.0   |
| 0.5      | $R_{\perp\perp}$ | cons.   | 0.6      | 0.4   | 0.6    | 0.6                  | 105 | 0.789             | 0.028*    | 0.937    | 0.000*    | 0.004                  | 0.004                  | 0.005                    | 1.662                  | 1.637                  | 100.0   |
| 0.5      | $R_{\perp\perp}$ | cons.   | 0.6      | 0.6   | 0.3    | 0.3                  | 138 | 0.799             | 0.408     | 0.944    | 0.041*    | -0.001                 | -0.002                 | -0.002                   | 1.721                  | 1.696                  | 100.0   |
| 0.5      | $R_{\perp\perp}$ | cons.   | 0.6      | 0.6   | 0.6    | 0.6                  | 97  | 0.774             | 0.000*    | 0.939    | 0.000*    | -0.001                 | 0.006                  | 0.002                    | 3.691                  | 3.695                  | 100.0   |
| 0.5      | $R_{\perp\perp}$ | sharp   | 0.4      | 0.4   | 0.3    | 0.3                  | 147 | 0.793             | 0.105     | 0.945    | 0.085     | -0.001                 | -0.002                 | -0.001                   | 2.447                  | 2.473                  | 100.0   |
| 0.5      | $R_{\perp\perp}$ | sharp   | 0.4      | 0.4   | 0.6    | 0.6                  | 102 | 0.765             | 0.000*    | 0.936    | 0.000*    | 0.001                  | 0.001                  | -0.000                   | 1.096                  | 1.090                  | 100.0   |
| 0.5      | $R_{\perp\perp}$ | sharp   | 0.4      | 0.6   | 0.3    | 0.3                  | 136 | 0.786             | 0.008*    | 0.948    | 0.559     | -0.004                 | -0.001                 | -0.001                   | 1.875                  | 1.914                  | 100.0   |
| 0.5      | $R_{\perp\perp}$ | sharp   | 0.4      | 0.6   | 0.6    | 0.6                  | 95  | 0.760             | 0.000*    | 0.938    | 0.000*    | -0.001                 | -0.003                 | -0.003                   | 2.184                  | 2.183                  | 100.0   |
| 0.5      | $R_{\perp\perp}$ | sharp   | 0.6      | 0.4   | 0.3    | 0.3                  | 147 | 0.800             | 0.477     | 0.943    | 0.021*    | 0.001                  | 0.001                  | 0.001                    | 2.282                  | 2.241                  | 100.0   |
| 0.5      | $R_{\perp\perp}$ | sharp   | 0.6      | 0.4   | 0.6    | 0.6                  | 102 | 0.780             | 0.000*    | 0.941    | 0.003*    | -0.001                 | 0.002                  | -0.001                   | 1.612                  | 1.603                  | 100.0   |
| 0.5      | $R_{\perp\perp}$ | sharp   | 0.6      | 0.6   | 0.3    | 0.3                  | 136 | 0.797             | 0.291     | 0.947    | 0.364     | 0.001                  | 0.001                  | -0.001                   | 1.720                  | 1.671                  | 100.0   |
| 0.5      | $R_{\perp\perp}$ | sharp   | 0.6      | 0.6   | 0.6    | 0.6                  | 95  | 0.757             | 0.000*    | 0.936    | 0.000*    | 0.002                  | 0.002                  | 0.002                    | 3.516                  | 3.551                  | 100.0   |



**Table S18:** Additional simulation results for design III when working assumption A2 is violated: the true within-person correlation structure is AR(1) with correlation  $\rho$

| $\delta$ | Response | Formula | $r_{-1}$ | $r_1$ | $\rho$ | $\rho_{\text{size}}$ | $n$ | $1 - \hat{\beta}$ | $p$ value | Coverage | $p$ value | $\text{Cor}(R, Y_0^2)$ | $\text{Cor}(R, Y_1^2)$ | $\text{Cor}(R, Y_0Y_1)$ | $\text{Cov}(Y_0, Y_2)$ | $\text{Cov}(Y_1, Y_2)$ | % Valid |
|----------|----------|---------|----------|-------|--------|----------------------|-----|-------------------|-----------|----------|-----------|------------------------|------------------------|-------------------------|------------------------|------------------------|---------|
| 0.3      | $R_+$    | cons.   | 0.4      | 0.4   | 0.0    | 0.0                  | 454 | 0.806             | 0.800     | 0.950    | 0.967     | -0.001                 | 0.077                  | 0.001                   | 2.356                  | -1.065                 | 100.0   |
| 0.3      | $R_+$    | cons.   | 0.4      | 0.4   | 0.3    | 0.3                  | 413 | 0.775             | 0.000*    | 0.951    | 0.769     | 0.009                  | 0.080                  | 0.032                   | -0.109                 | -0.095                 | 100.0   |
| 0.3      | $R_+$    | cons.   | 0.4      | 0.4   | 0.6    | 0.6                  | 291 | 0.687             | 0.000*    | 0.953    | 0.530     | 0.027                  | 0.079                  | 0.057                   | -0.100                 | -0.096                 | 100.0   |
| 0.3      | $R_+$    | cons.   | 0.4      | 0.4   | 0.8    | 0.8                  | 164 | 0.637             | 0.000*    | 0.940    | 0.013*    | 0.050                  | 0.081                  | 0.070                   | -0.107                 | -0.100                 | 100.0   |
| 0.3      | $R_+$    | cons.   | 0.4      | 0.6   | 0.0    | 0.0                  | 419 | 0.812             | 0.948     | 0.948    | 0.675     | -0.000                 | 0.009                  | -0.002                  | 1.312                  | -1.817                 | 100.0   |
| 0.3      | $R_+$    | cons.   | 0.4      | 0.6   | 0.3    | 0.3                  | 381 | 0.763             | 0.000*    | 0.955    | 0.194     | 0.003                  | 0.009                  | 0.005                   | -0.000                 | 0.027                  | 100.0   |
| 0.3      | $R_+$    | cons.   | 0.4      | 0.6   | 0.6    | 0.6                  | 268 | 0.714             | 0.000*    | 0.951    | 0.900     | 0.005                  | 0.010                  | 0.008                   | 0.026                  | 0.022                  | 100.0   |
| 0.3      | $R_+$    | cons.   | 0.6      | 0.4   | 0.0    | 0.0                  | 454 | 0.808             | 0.878     | 0.941    | 0.033*    | -0.001                 | 0.010                  | 0.001                   | 1.073                  | 0.555                  | 100.0   |
| 0.3      | $R_+$    | cons.   | 0.6      | 0.4   | 0.3    | 0.3                  | 413 | 0.781             | 0.005*    | 0.955    | 0.258     | 0.002                  | 0.013                  | 0.005                   | -0.091                 | -0.038                 | 100.0   |
| 0.3      | $R_+$    | cons.   | 0.6      | 0.4   | 0.6    | 0.6                  | 291 | 0.694             | 0.000*    | 0.954    | 0.295     | 0.003                  | 0.011                  | 0.007                   | -0.039                 | -0.037                 | 100.0   |
| 0.3      | $R_+$    | cons.   | 0.6      | 0.4   | 0.8    | 0.8                  | 164 | 0.638             | 0.000*    | 0.942    | 0.049*    | 0.008                  | 0.015                  | 0.013                   | -0.045                 | -0.037                 | 100.0   |
| 0.3      | $R_+$    | cons.   | 0.6      | 0.6   | 0.0    | 0.0                  | 419 | 0.817             | 0.990     | 0.951    | 0.769     | -0.000                 | -0.059                 | -0.002                  | 0.981                  | -2.575                 | 100.0   |
| 0.3      | $R_+$    | cons.   | 0.6      | 0.6   | 0.3    | 0.3                  | 381 | 0.771             | 0.000*    | 0.959    | 0.029*    | -0.004                 | -0.061                 | -0.024                  | 0.064                  | 0.085                  | 100.0   |
| 0.3      | $R_+$    | cons.   | 0.6      | 0.6   | 0.6    | 0.6                  | 268 | 0.709             | 0.000*    | 0.946    | 0.357     | -0.021                 | -0.060                 | -0.042                  | 0.085                  | 0.081                  | 100.0   |
| 0.3      | $R_+$    | sharp   | 0.4      | 0.4   | 0.3    | 0.3                  | 408 | 0.766             | 0.000*    | 0.940    | 0.012*    | 0.010                  | 0.078                  | 0.032                   | -0.119                 | -0.106                 | 100.0   |
| 0.3      | $R_+$    | sharp   | 0.4      | 0.4   | 0.6    | 0.6                  | 281 | 0.678             | 0.000*    | 0.950    | 1.000     | 0.030                  | 0.078                  | 0.057                   | -0.109                 | -0.104                 | 100.0   |
| 0.3      | $R_+$    | sharp   | 0.4      | 0.4   | 0.8    | 0.8                  | 156 | 0.618             | 0.000*    | 0.940    | 0.012*    | 0.051                  | 0.078                  | 0.070                   | -0.095                 | -0.099                 | 100.0   |
| 0.3      | $R_+$    | sharp   | 0.4      | 0.6   | 0.3    | 0.3                  | 378 | 0.759             | 0.000*    | 0.948    | 0.675     | 0.001                  | 0.008                  | 0.002                   | -0.016                 | 0.014                  | 100.0   |
| 0.3      | $R_+$    | sharp   | 0.4      | 0.6   | 0.6    | 0.6                  | 262 | 0.699             | 0.000*    | 0.947    | 0.451     | 0.003                  | 0.009                  | 0.008                   | 0.016                  | 0.023                  | 100.0   |
| 0.3      | $R_+$    | sharp   | 0.6      | 0.4   | 0.3    | 0.3                  | 408 | 0.752             | 0.000*    | 0.938    | 0.003*    | 0.004                  | 0.011                  | 0.005                   | -0.041                 | -0.043                 | 100.0   |
| 0.3      | $R_+$    | sharp   | 0.6      | 0.4   | 0.6    | 0.6                  | 281 | 0.680             | 0.000*    | 0.945    | 0.241     | 0.005                  | 0.011                  | 0.008                   | -0.047                 | -0.042                 | 100.0   |
| 0.3      | $R_+$    | sharp   | 0.6      | 0.4   | 0.8    | 0.8                  | 156 | 0.635             | 0.000*    | 0.943    | 0.071     | 0.007                  | 0.010                  | 0.009                   | -0.036                 | -0.039                 | 100.0   |
| 0.3      | $R_+$    | sharp   | 0.6      | 0.6   | 0.3    | 0.3                  | 378 | 0.758             | 0.000*    | 0.947    | 0.402     | -0.006                 | -0.062                 | -0.025                  | 0.022                  | 0.074                  | 100.0   |
| 0.3      | $R_+$    | sharp   | 0.6      | 0.6   | 0.6    | 0.6                  | 262 | 0.703             | 0.000*    | 0.950    | 1.000     | -0.022                 | -0.060                 | -0.043                  | 0.073                  | 0.079                  | 100.0   |
| 0.3      | $R_-$    | cons.   | 0.4      | 0.4   | 0.0    | 0.0                  | 454 | 0.813             | 0.965     | 0.946    | 0.357     | 0.001                  | 0.080                  | -0.000                  | 2.210                  | -0.640                 | 100.0   |
| 0.3      | $R_-$    | cons.   | 0.4      | 0.4   | 0.3    | 0.3                  | 413 | 0.765             | 0.000*    | 0.957    | 0.065     | 0.008                  | 0.078                  | 0.031                   | -0.081                 | -0.119                 | 100.0   |
| 0.3      | $R_-$    | cons.   | 0.4      | 0.4   | 0.6    | 0.6                  | 291 | 0.675             | 0.000*    | 0.954    | 0.379     | 0.030                  | 0.080                  | 0.058                   | -0.100                 | -0.096                 | 100.0   |
| 0.3      | $R_-$    | cons.   | 0.4      | 0.4   | 0.8    | 0.8                  | 164 | 0.617             | 0.000*    | 0.933    | 0.000*    | 0.050                  | 0.077                  | 0.069                   | -0.106                 | -0.108                 | 100.0   |
| 0.3      | $R_-$    | cons.   | 0.4      | 0.6   | 0.0    | 0.0                  | 419 | 0.806             | 0.800     | 0.949    | 0.737     | 0.001                  | 0.009                  | 0.002                   | 1.799                  | 1.982                  | 100.0   |
| 0.3      | $R_-$    | cons.   | 0.4      | 0.6   | 0.3    | 0.3                  | 381 | 0.773             | 0.000*    | 0.957    | 0.102     | 0.000                  | 0.010                  | 0.003                   | -0.029                 | 0.018                  | 100.0   |
| 0.3      | $R_-$    | cons.   | 0.4      | 0.6   | 0.6    | 0.6                  | 268 | 0.684             | 0.000*    | 0.951    | 0.900     | 0.004                  | 0.009                  | 0.008                   | 0.023                  | 0.023                  | 100.0   |
| 0.3      | $R_-$    | cons.   | 0.6      | 0.4   | 0.0    | 0.0                  | 454 | 0.820             | 0.998     | 0.946    | 0.276     | 0.001                  | 0.014                  | 0.001                   | 2.618                  | -1.712                 | 100.0   |
| 0.3      | $R_-$    | cons.   | 0.6      | 0.4   | 0.3    | 0.3                  | 413 | 0.770             | 0.000*    | 0.950    | 1.000     | 0.001                  | 0.009                  | 0.004                   | -0.030                 | -0.056                 | 100.0   |
| 0.3      | $R_-$    | cons.   | 0.6      | 0.4   | 0.6    | 0.6                  | 291 | 0.675             | 0.000*    | 0.954    | 0.379     | 0.006                  | 0.010                  | 0.008                   | -0.034                 | -0.032                 | 100.0   |
| 0.3      | $R_-$    | cons.   | 0.6      | 0.4   | 0.8    | 0.8                  | 164 | 0.614             | 0.000*    | 0.936    | 0.001*    | 0.006                  | 0.008                  | 0.008                   | -0.042                 | -0.045                 | 100.0   |
| 0.3      | $R_-$    | cons.   | 0.6      | 0.6   | 0.0    | 0.0                  | 419 | 0.814             | 0.977     | 0.951    | 0.834     | -0.001                 | -0.060                 | 0.003                   | -2.764                 | 2.229                  | 100.0   |
| 0.3      | $R_-$    | cons.   | 0.6      | 0.6   | 0.3    | 0.3                  | 381 | 0.767             | 0.000*    | 0.957    | 0.079     | -0.005                 | -0.059                 | -0.024                  | 0.026                  | 0.084                  | 100.0   |
| 0.3      | $R_-$    | cons.   | 0.6      | 0.6   | 0.6    | 0.6                  | 268 | 0.687             | 0.000*    | 0.948    | 0.615     | -0.022                 | -0.059                 | -0.043                  | 0.077                  | 0.080                  | 100.0   |
| 0.3      | $R_-$    | sharp   | 0.4      | 0.4   | 0.3    | 0.3                  | 408 | 0.756             | 0.000*    | 0.948    | 0.615     | 0.008                  | 0.080                  | 0.031                   | -0.078                 | -0.095                 | 100.0   |
| 0.3      | $R_-$    | sharp   | 0.4      | 0.4   | 0.6    | 0.6                  | 281 | 0.656             | 0.000*    | 0.942    | 0.040*    | 0.029                  | 0.079                  | 0.057                   | -0.102                 | -0.107                 | 100.0   |
| 0.3      | $R_-$    | sharp   | 0.4      | 0.4   | 0.8    | 0.8                  | 156 | 0.590             | 0.000*    | 0.944    | 0.154     | 0.051                  | 0.079                  | 0.070                   | -0.099                 | -0.099                 | 100.0   |
| 0.3      | $R_-$    | sharp   | 0.4      | 0.6   | 0.3    | 0.3                  | 378 | 0.766             | 0.000*    | 0.950    | 0.933     | 0.004                  | 0.012                  | 0.006                   | 0.143                  | 0.021                  | 100.0   |
| 0.3      | $R_-$    | sharp   | 0.4      | 0.6   | 0.6    | 0.6                  | 262 | 0.659             | 0.000*    | 0.946    | 0.315     | 0.004                  | 0.012                  | 0.008                   | 0.023                  | 0.027                  | 100.0   |
| 0.3      | $R_-$    | sharp   | 0.6      | 0.4   | 0.3    | 0.3                  | 408 | 0.739             | 0.000*    | 0.942    | 0.040*    | 0.002                  | 0.010                  | 0.003                   | -0.005                 | -0.028                 | 100.0   |
| 0.3      | $R_-$    | sharp   | 0.6      | 0.4   | 0.6    | 0.6                  | 281 | 0.662             | 0.000*    | 0.945    | 0.209     | 0.004                  | 0.009                  | 0.006                   | -0.042                 | -0.044                 | 100.0   |
| 0.3      | $R_-$    | sharp   | 0.6      | 0.4   | 0.8    | 0.8                  | 156 | 0.602             | 0.000*    | 0.947    | 0.402     | 0.005                  | 0.009                  | 0.008                   | -0.034                 | -0.032                 | 100.0   |

Continued on next page

Additional simulation results for design III when working assumption A2 is violated: the true within-person correlation structure is AR(1) with correlation  $\rho$

| $\delta$ | Response         | Formula | $r_{-1}$ | $r_1$ | $\rho$ | $\rho_{\text{size}}$ | $n$ | $1 - \hat{\beta}$ | $p$ value | Coverage | $p$ value | $\text{Cor}(R, Y_0^2)$ | $\text{Cor}(R, Y_1^2)$ | $\text{Cor}(R, Y_0Y_1)$ | $\text{Cov}(Y_0, Y_2)$ | $\text{Cov}(Y_1, Y_2)$ | % Valid |
|----------|------------------|---------|----------|-------|--------|----------------------|-----|-------------------|-----------|----------|-----------|------------------------|------------------------|-------------------------|------------------------|------------------------|---------|
| 0.3      | $R_-$            | sharp   | 0.6      | 0.6   | 0.3    | 0.3                  | 378 | 0.760             | 0.000*    | 0.945    | 0.209     | -0.006                 | -0.060                 | -0.022                  | 0.188                  | 0.087                  | 100.0   |
| 0.3      | $R_-$            | sharp   | 0.6      | 0.6   | 0.6    | 0.6                  | 262 | 0.673             | 0.000*    | 0.948    | 0.615     | -0.021                 | -0.059                 | -0.043                  | 0.080                  | 0.085                  | 100.0   |
| 0.3      | $R_{\perp\perp}$ | cons.   | 0.4      | 0.4   | 0.0    | 0.0                  | 454 | 0.806             | 0.813     | 0.947    | 0.402     | -0.000                 | 0.002                  | -0.001                  | 1.721                  | -5.101                 | 100.0   |
| 0.3      | $R_{\perp\perp}$ | cons.   | 0.4      | 0.4   | 0.3    | 0.3                  | 413 | 0.766             | 0.000*    | 0.951    | 0.769     | -0.002                 | 0.001                  | -0.003                  | 0.020                  | 0.000                  | 100.0   |
| 0.3      | $R_{\perp\perp}$ | cons.   | 0.4      | 0.4   | 0.6    | 0.6                  | 291 | 0.682             | 0.000*    | 0.951    | 0.834     | -0.002                 | -0.000                 | -0.001                  | 0.004                  | 0.001                  | 100.0   |
| 0.3      | $R_{\perp\perp}$ | cons.   | 0.4      | 0.4   | 0.8    | 0.8                  | 164 | 0.616             | 0.000*    | 0.944    | 0.111     | -0.004                 | -0.002                 | -0.004                  | -0.001                 | -0.001                 | 100.0   |
| 0.3      | $R_{\perp\perp}$ | cons.   | 0.4      | 0.6   | 0.0    | 0.0                  | 419 | 0.800             | 0.507     | 0.953    | 0.426     | -0.000                 | 0.001                  | -0.001                  | -1.257                 | -1.328                 | 100.0   |
| 0.3      | $R_{\perp\perp}$ | cons.   | 0.4      | 0.6   | 0.3    | 0.3                  | 381 | 0.781             | 0.006*    | 0.954    | 0.295     | 0.003                  | 0.001                  | 0.002                   | -0.043                 | -0.010                 | 100.0   |
| 0.3      | $R_{\perp\perp}$ | cons.   | 0.4      | 0.6   | 0.6    | 0.6                  | 268 | 0.699             | 0.000*    | 0.945    | 0.180     | 0.003                  | 0.001                  | 0.003                   | 0.000                  | 0.002                  | 100.0   |
| 0.3      | $R_{\perp\perp}$ | cons.   | 0.4      | 0.6   | 0.8    | 0.8                  | 151 | 0.612             | 0.000*    | 0.937    | 0.001*    | -0.002                 | 0.001                  | -0.002                  | -0.005                 | 0.003                  | 100.0   |
| 0.3      | $R_{\perp\perp}$ | cons.   | 0.6      | 0.4   | 0.0    | 0.0                  | 454 | 0.813             | 0.961     | 0.952    | 0.706     | 0.002                  | 0.001                  | -0.001                  | 2.936                  | -1.925                 | 100.0   |
| 0.3      | $R_{\perp\perp}$ | cons.   | 0.6      | 0.4   | 0.3    | 0.3                  | 413 | 0.777             | 0.001*    | 0.946    | 0.315     | 0.002                  | -0.001                 | 0.001                   | 0.016                  | 0.003                  | 100.0   |
| 0.3      | $R_{\perp\perp}$ | cons.   | 0.6      | 0.4   | 0.6    | 0.6                  | 291 | 0.679             | 0.000*    | 0.955    | 0.224     | 0.002                  | 0.003                  | 0.003                   | 0.004                  | 0.006                  | 100.0   |
| 0.3      | $R_{\perp\perp}$ | cons.   | 0.6      | 0.4   | 0.8    | 0.8                  | 164 | 0.621             | 0.000*    | 0.947    | 0.503     | 0.002                  | 0.004                  | 0.004                   | 0.005                  | 0.002                  | 100.0   |
| 0.3      | $R_{\perp\perp}$ | cons.   | 0.6      | 0.6   | 0.0    | 0.0                  | 419 | 0.813             | 0.965     | 0.946    | 0.315     | -0.000                 | 0.002                  | 0.001                   | 1.959                  | 0.065                  | 100.0   |
| 0.3      | $R_{\perp\perp}$ | cons.   | 0.6      | 0.6   | 0.3    | 0.3                  | 381 | 0.778             | 0.002*    | 0.958    | 0.054     | 0.001                  | 0.002                  | 0.002                   | -0.039                 | -0.003                 | 100.0   |
| 0.3      | $R_{\perp\perp}$ | cons.   | 0.6      | 0.6   | 0.6    | 0.6                  | 268 | 0.692             | 0.000*    | 0.949    | 0.867     | -0.002                 | -0.003                 | -0.001                  | -0.005                 | -0.002                 | 100.0   |
| 0.3      | $R_{\perp\perp}$ | cons.   | 0.6      | 0.6   | 0.8    | 0.8                  | 151 | 0.605             | 0.000*    | 0.939    | 0.007*    | 0.002                  | 0.003                  | 0.003                   | 0.001                  | 0.005                  | 100.0   |
| 0.3      | $R_{\perp\perp}$ | sharp   | 0.4      | 0.4   | 0.3    | 0.3                  | 408 | 0.759             | 0.000*    | 0.944    | 0.132     | -0.001                 | 0.001                  | 0.001                   | 0.027                  | -0.005                 | 100.0   |
| 0.3      | $R_{\perp\perp}$ | sharp   | 0.4      | 0.4   | 0.6    | 0.6                  | 281 | 0.675             | 0.000*    | 0.943    | 0.094     | -0.001                 | -0.000                 | -0.001                  | 0.007                  | 0.001                  | 100.0   |
| 0.3      | $R_{\perp\perp}$ | sharp   | 0.4      | 0.4   | 0.8    | 0.8                  | 156 | 0.597             | 0.000*    | 0.942    | 0.049*    | 0.001                  | 0.003                  | 0.002                   | 0.007                  | 0.006                  | 100.0   |
| 0.3      | $R_{\perp\perp}$ | sharp   | 0.4      | 0.6   | 0.3    | 0.3                  | 378 | 0.766             | 0.000*    | 0.949    | 0.737     | -0.001                 | 0.002                  | 0.002                   | -0.052                 | -0.006                 | 100.0   |
| 0.3      | $R_{\perp\perp}$ | sharp   | 0.4      | 0.6   | 0.6    | 0.6                  | 262 | 0.677             | 0.000*    | 0.944    | 0.132     | -0.002                 | 0.001                  | -0.001                  | 0.009                  | 0.007                  | 100.0   |
| 0.3      | $R_{\perp\perp}$ | sharp   | 0.4      | 0.6   | 0.8    | 0.8                  | 146 | 0.586             | 0.000*    | 0.947    | 0.503     | -0.002                 | 0.003                  | 0.004                   | 0.004                  | 0.006                  | 100.0   |
| 0.3      | $R_{\perp\perp}$ | sharp   | 0.6      | 0.4   | 0.3    | 0.3                  | 408 | 0.761             | 0.000*    | 0.941    | 0.021*    | 0.002                  | -0.002                 | 0.002                   | 0.032                  | -0.001                 | 100.0   |
| 0.3      | $R_{\perp\perp}$ | sharp   | 0.6      | 0.4   | 0.6    | 0.6                  | 281 | 0.677             | 0.000*    | 0.945    | 0.241     | 0.001                  | 0.000                  | 0.001                   | 0.005                  | 0.002                  | 100.0   |
| 0.3      | $R_{\perp\perp}$ | sharp   | 0.6      | 0.4   | 0.8    | 0.8                  | 156 | 0.603             | 0.000*    | 0.938    | 0.003*    | 0.002                  | 0.003                  | 0.002                   | 0.001                  | 0.001                  | 100.0   |
| 0.3      | $R_{\perp\perp}$ | sharp   | 0.6      | 0.6   | 0.3    | 0.3                  | 378 | 0.770             | 0.000*    | 0.945    | 0.180     | -0.001                 | -0.003                 | -0.002                  | -0.045                 | -0.016                 | 100.0   |
| 0.3      | $R_{\perp\perp}$ | sharp   | 0.6      | 0.6   | 0.6    | 0.6                  | 262 | 0.682             | 0.000*    | 0.949    | 0.801     | 0.004                  | 0.002                  | 0.004                   | 0.015                  | 0.010                  | 100.0   |
| 0.3      | $R_{\perp\perp}$ | sharp   | 0.6      | 0.6   | 0.8    | 0.8                  | 146 | 0.587             | 0.000*    | 0.945    | 0.209     | -0.002                 | -0.001                 | -0.001                  | 0.004                  | 0.004                  | 100.0   |
| 0.5      | $R_+$            | cons.   | 0.4      | 0.4   | 0.0    | 0.0                  | 164 | 0.792             | 0.152     | 0.941    | 0.026*    | 0.001                  | 0.078                  | 0.008                   | -2.077                 | -0.605                 | 100.0   |
| 0.5      | $R_+$            | cons.   | 0.4      | 0.4   | 0.3    | 0.3                  | 149 | 0.789             | 0.070     | 0.944    | 0.154     | 0.010                  | 0.083                  | 0.033                   | -0.037                 | -0.100                 | 100.0   |
| 0.5      | $R_+$            | cons.   | 0.4      | 0.4   | 0.6    | 0.6                  | 105 | 0.698             | 0.000*    | 0.937    | 0.002*    | 0.029                  | 0.082                  | 0.058                   | -0.114                 | -0.107                 | 100.0   |
| 0.5      | $R_+$            | cons.   | 0.4      | 0.4   | 0.8    | 0.8                  | 59  | 0.684             | 0.000*    | 0.938    | 0.003*    | 0.052                  | 0.081                  | 0.072                   | -0.121                 | -0.108                 | 100.0   |
| 0.5      | $R_+$            | cons.   | 0.4      | 0.6   | 0.0    | 0.0                  | 151 | 0.811             | 0.938     | 0.940    | 0.013*    | -0.002                 | 0.012                  | 0.003                   | -1.188                 | -1.693                 | 100.0   |
| 0.5      | $R_+$            | cons.   | 0.4      | 0.6   | 0.3    | 0.3                  | 138 | 0.789             | 0.070     | 0.944    | 0.154     | 0.001                  | 0.011                  | 0.004                   | 0.039                  | 0.023                  | 100.0   |
| 0.5      | $R_+$            | cons.   | 0.4      | 0.6   | 0.6    | 0.6                  | 97  | 0.701             | 0.000*    | 0.939    | 0.007*    | 0.004                  | 0.013                  | 0.007                   | 0.020                  | 0.024                  | 100.0   |
| 0.5      | $R_+$            | cons.   | 0.6      | 0.4   | 0.0    | 0.0                  | 164 | 0.799             | 0.435     | 0.945    | 0.180     | 0.001                  | 0.012                  | 0.007                   | -3.145                 | -10.420                | 100.0   |
| 0.5      | $R_+$            | cons.   | 0.6      | 0.4   | 0.3    | 0.3                  | 149 | 0.784             | 0.018*    | 0.946    | 0.276     | 0.002                  | 0.011                  | 0.007                   | -0.028                 | -0.040                 | 100.0   |
| 0.5      | $R_+$            | cons.   | 0.6      | 0.4   | 0.6    | 0.6                  | 105 | 0.703             | 0.000*    | 0.940    | 0.013*    | 0.007                  | 0.011                  | 0.010                   | -0.048                 | -0.040                 | 100.0   |
| 0.5      | $R_+$            | cons.   | 0.6      | 0.4   | 0.8    | 0.8                  | 59  | 0.678             | 0.000*    | 0.934    | 0.000*    | 0.009                  | 0.012                  | 0.012                   | -0.058                 | -0.047                 | 100.0   |
| 0.5      | $R_+$            | cons.   | 0.6      | 0.6   | 0.0    | 0.0                  | 151 | 0.805             | 0.745     | 0.939    | 0.007*    | -0.002                 | -0.060                 | 0.002                   | -0.470                 | -3.494                 | 100.0   |
| 0.5      | $R_+$            | cons.   | 0.6      | 0.6   | 0.3    | 0.3                  | 138 | 0.778             | 0.002*    | 0.944    | 0.111     | -0.004                 | -0.062                 | -0.025                  | 0.122                  | 0.088                  | 100.0   |
| 0.5      | $R_+$            | cons.   | 0.6      | 0.6   | 0.6    | 0.6                  | 97  | 0.705             | 0.000*    | 0.936    | 0.001*    | -0.025                 | -0.060                 | -0.044                  | 0.089                  | 0.088                  | 100.0   |
| 0.5      | $R_+$            | sharp   | 0.4      | 0.4   | 0.3    | 0.3                  | 147 | 0.775             | 0.000*    | 0.945    | 0.241     | 0.009                  | 0.079                  | 0.033                   | -0.109                 | -0.090                 | 100.0   |

Continued on next page

Additional simulation results for design III when working assumption A2 is violated: the true within-person correlation structure is AR(1) with correlation  $\rho$

| $\delta$ | Response         | Formula | $r_{-1}$ | $r_1$ | $\rho$ | $\rho_{\text{size}}$ | $n$ | $1 - \hat{\beta}$ | $p$ value | Coverage | $p$ value | $\text{Cor}(R, Y_0^2)$ | $\text{Cor}(R, Y_1^2)$ | $\text{Cor}(R, Y_0Y_1)$ | $\text{Cov}(Y_0, Y_2)$ | $\text{Cov}(Y_1, Y_2)$ | % Valid |
|----------|------------------|---------|----------|-------|--------|----------------------|-----|-------------------|-----------|----------|-----------|------------------------|------------------------|-------------------------|------------------------|------------------------|---------|
| 0.5      | $R_+$            | sharp   | 0.4      | 0.4   | 0.6    | 0.6                  | 102 | 0.685             | 0.000*    | 0.949    | 0.801     | 0.028                  | 0.081                  | 0.060                   | -0.100                 | -0.095                 | 100.0   |
| 0.5      | $R_+$            | sharp   | 0.4      | 0.4   | 0.8    | 0.8                  | 57  | 0.656             | 0.000*    | 0.938    | 0.003*    | 0.049                  | 0.083                  | 0.073                   | -0.109                 | -0.100                 | 100.0   |
| 0.5      | $R_+$            | sharp   | 0.4      | 0.6   | 0.3    | 0.3                  | 136 | 0.779             | 0.003*    | 0.941    | 0.021*    | 0.007                  | 0.009                  | 0.005                   | -0.050                 | 0.029                  | 100.0   |
| 0.5      | $R_+$            | sharp   | 0.4      | 0.6   | 0.6    | 0.6                  | 95  | 0.713             | 0.000*    | 0.946    | 0.356     | 0.008                  | 0.013                  | 0.013                   | 0.038                  | 0.035                  | 100.0   |
| 0.5      | $R_+$            | sharp   | 0.6      | 0.4   | 0.3    | 0.3                  | 147 | 0.771             | 0.000*    | 0.942    | 0.040*    | 0.001                  | 0.010                  | 0.007                   | -0.086                 | -0.031                 | 100.0   |
| 0.5      | $R_+$            | sharp   | 0.6      | 0.4   | 0.6    | 0.6                  | 102 | 0.690             | 0.000*    | 0.943    | 0.094     | 0.005                  | 0.013                  | 0.008                   | -0.028                 | -0.029                 | 100.0   |
| 0.5      | $R_+$            | sharp   | 0.6      | 0.4   | 0.8    | 0.8                  | 57  | 0.661             | 0.000*    | 0.939    | 0.007*    | 0.005                  | 0.013                  | 0.013                   | -0.034                 | -0.030                 | 100.0   |
| 0.5      | $R_+$            | sharp   | 0.6      | 0.6   | 0.3    | 0.3                  | 136 | 0.771             | 0.000*    | 0.937    | 0.002*    | -0.006                 | -0.062                 | -0.024                  | -0.011                 | 0.089                  | 100.0   |
| 0.5      | $R_+$            | sharp   | 0.6      | 0.6   | 0.6    | 0.6                  | 95  | 0.701             | 0.000*    | 0.947    | 0.402     | -0.017                 | -0.059                 | -0.042                  | 0.096                  | 0.098                  | 100.0   |
| 0.5      | $R_-$            | cons.   | 0.4      | 0.4   | 0.0    | 0.0                  | 164 | 0.804             | 0.730     | 0.944    | 0.132     | -0.002                 | 0.080                  | -0.008                  | -0.499                 | -0.428                 | 100.0   |
| 0.5      | $R_-$            | cons.   | 0.4      | 0.4   | 0.3    | 0.3                  | 149 | 0.765             | 0.000*    | 0.940    | 0.013*    | 0.007                  | 0.081                  | 0.032                   | -0.107                 | -0.102                 | 100.0   |
| 0.5      | $R_-$            | cons.   | 0.4      | 0.4   | 0.6    | 0.6                  | 105 | 0.661             | 0.000*    | 0.938    | 0.003*    | 0.027                  | 0.080                  | 0.056                   | -0.115                 | -0.109                 | 100.0   |
| 0.5      | $R_-$            | cons.   | 0.4      | 0.6   | 0.0    | 0.0                  | 151 | 0.813             | 0.965     | 0.945    | 0.209     | 0.003                  | 0.009                  | -0.003                  | -1.958                 | -1.207                 | 100.0   |
| 0.5      | $R_-$            | cons.   | 0.4      | 0.6   | 0.3    | 0.3                  | 138 | 0.757             | 0.000*    | 0.945    | 0.241     | -0.003                 | 0.010                  | 0.006                   | 0.029                  | 0.018                  | 100.0   |
| 0.5      | $R_-$            | cons.   | 0.6      | 0.4   | 0.0    | 0.0                  | 164 | 0.809             | 0.904     | 0.943    | 0.094     | -0.001                 | 0.013                  | -0.008                  | -0.468                 | -1.210                 | 100.0   |
| 0.5      | $R_-$            | cons.   | 0.6      | 0.4   | 0.3    | 0.3                  | 149 | 0.776             | 0.001*    | 0.945    | 0.180     | -0.002                 | 0.012                  | 0.003                   | 0.008                  | -0.031                 | 100.0   |
| 0.5      | $R_-$            | cons.   | 0.6      | 0.4   | 0.6    | 0.6                  | 105 | 0.661             | 0.000*    | 0.936    | 0.000*    | 0.003                  | 0.011                  | 0.009                   | -0.049                 | -0.046                 | 100.0   |
| 0.5      | $R_-$            | cons.   | 0.6      | 0.6   | 0.0    | 0.0                  | 151 | 0.808             | 0.878     | 0.944    | 0.132     | 0.004                  | -0.062                 | -0.004                  | -1.113                 | -0.916                 | 100.0   |
| 0.5      | $R_-$            | cons.   | 0.6      | 0.6   | 0.3    | 0.3                  | 138 | 0.762             | 0.000*    | 0.946    | 0.276     | -0.006                 | -0.061                 | -0.025                  | 0.195                  | 0.100                  | 100.0   |
| 0.5      | $R_-$            | sharp   | 0.4      | 0.4   | 0.3    | 0.3                  | 147 | 0.765             | 0.000*    | 0.944    | 0.132     | 0.009                  | 0.078                  | 0.030                   | -0.152                 | -0.100                 | 100.0   |
| 0.5      | $R_-$            | sharp   | 0.4      | 0.4   | 0.6    | 0.6                  | 102 | 0.638             | 0.000*    | 0.942    | 0.059     | 0.030                  | 0.078                  | 0.057                   | -0.111                 | -0.103                 | 100.0   |
| 0.5      | $R_-$            | sharp   | 0.4      | 0.6   | 0.3    | 0.3                  | 136 | 0.763             | 0.000*    | 0.941    | 0.033*    | 0.002                  | 0.011                  | 0.004                   | -0.018                 | 0.004                  | 100.0   |
| 0.5      | $R_-$            | sharp   | 0.6      | 0.4   | 0.3    | 0.3                  | 147 | 0.766             | 0.000*    | 0.946    | 0.276     | 0.003                  | 0.008                  | 0.002                   | -0.048                 | -0.034                 | 100.0   |
| 0.5      | $R_-$            | sharp   | 0.6      | 0.4   | 0.6    | 0.6                  | 102 | 0.654             | 0.000*    | 0.942    | 0.049*    | 0.008                  | 0.011                  | 0.010                   | -0.047                 | -0.036                 | 100.0   |
| 0.5      | $R_-$            | sharp   | 0.6      | 0.6   | 0.3    | 0.3                  | 136 | 0.750             | 0.000*    | 0.937    | 0.002*    | -0.007                 | -0.060                 | -0.024                  | 0.020                  | 0.072                  | 100.0   |
| 0.5      | $R_{\perp\perp}$ | cons.   | 0.4      | 0.4   | 0.0    | 0.0                  | 164 | 0.811             | 0.932     | 0.949    | 0.737     | -0.004                 | 0.002                  | -0.001                  | 0.422                  | -1.418                 | 100.0   |
| 0.5      | $R_{\perp\perp}$ | cons.   | 0.4      | 0.4   | 0.3    | 0.3                  | 149 | 0.783             | 0.011*    | 0.946    | 0.357     | -0.005                 | 0.003                  | 0.002                   | -0.064                 | 0.007                  | 100.0   |
| 0.5      | $R_{\perp\perp}$ | cons.   | 0.4      | 0.4   | 0.6    | 0.6                  | 105 | 0.674             | 0.000*    | 0.940    | 0.012*    | -0.006                 | -0.004                 | -0.003                  | -0.004                 | -0.004                 | 100.0   |
| 0.5      | $R_{\perp\perp}$ | cons.   | 0.4      | 0.4   | 0.8    | 0.8                  | 59  | 0.635             | 0.000*    | 0.927    | 0.000*    | 0.005                  | 0.003                  | 0.004                   | 0.009                  | 0.003                  | 100.0   |
| 0.5      | $R_{\perp\perp}$ | cons.   | 0.4      | 0.6   | 0.0    | 0.0                  | 151 | 0.797             | 0.365     | 0.932    | 0.000*    | -0.002                 | 0.003                  | 0.002                   | -1.109                 | 1.040                  | 100.0   |
| 0.5      | $R_{\perp\perp}$ | cons.   | 0.4      | 0.6   | 0.3    | 0.3                  | 138 | 0.763             | 0.000*    | 0.948    | 0.615     | -0.003                 | 0.004                  | 0.005                   | -0.010                 | -0.007                 | 100.0   |
| 0.5      | $R_{\perp\perp}$ | cons.   | 0.4      | 0.6   | 0.6    | 0.6                  | 97  | 0.662             | 0.000*    | 0.942    | 0.040*    | -0.001                 | -0.003                 | -0.002                  | 0.008                  | 0.009                  | 100.0   |
| 0.5      | $R_{\perp\perp}$ | cons.   | 0.4      | 0.6   | 0.8    | 0.8                  | 55  | 0.622             | 0.000*    | 0.944    | 0.120     | 0.008                  | 0.010                  | 0.008                   | 0.069                  | 0.067                  | 99.4    |
| 0.5      | $R_{\perp\perp}$ | cons.   | 0.6      | 0.4   | 0.0    | 0.0                  | 164 | 0.807             | 0.837     | 0.952    | 0.645     | 0.002                  | -0.002                 | 0.003                   | 0.120                  | -0.041                 | 100.0   |
| 0.5      | $R_{\perp\perp}$ | cons.   | 0.6      | 0.4   | 0.3    | 0.3                  | 149 | 0.776             | 0.001*    | 0.943    | 0.094     | -0.001                 | -0.003                 | -0.001                  | -0.032                 | 0.010                  | 100.0   |
| 0.5      | $R_{\perp\perp}$ | cons.   | 0.6      | 0.4   | 0.6    | 0.6                  | 105 | 0.690             | 0.000*    | 0.947    | 0.402     | -0.004                 | 0.001                  | -0.002                  | -0.015                 | -0.003                 | 100.0   |
| 0.5      | $R_{\perp\perp}$ | cons.   | 0.6      | 0.4   | 0.8    | 0.8                  | 59  | 0.641             | 0.000*    | 0.934    | 0.000*    | 0.002                  | 0.003                  | -0.002                  | -0.003                 | -0.003                 | 100.0   |
| 0.5      | $R_{\perp\perp}$ | cons.   | 0.6      | 0.6   | 0.0    | 0.0                  | 151 | 0.801             | 0.544     | 0.935    | 0.000*    | 0.002                  | 0.003                  | 0.003                   | -0.976                 | 0.120                  | 100.0   |
| 0.5      | $R_{\perp\perp}$ | cons.   | 0.6      | 0.6   | 0.3    | 0.3                  | 138 | 0.768             | 0.000*    | 0.950    | 1.000     | 0.003                  | 0.005                  | 0.005                   | 0.045                  | -0.007                 | 100.0   |
| 0.5      | $R_{\perp\perp}$ | cons.   | 0.6      | 0.6   | 0.6    | 0.6                  | 97  | 0.664             | 0.000*    | 0.938    | 0.003*    | 0.002                  | 0.004                  | 0.002                   | 0.009                  | 0.011                  | 100.0   |
| 0.5      | $R_{\perp\perp}$ | cons.   | 0.6      | 0.6   | 0.8    | 0.8                  | 55  | 0.625             | 0.000*    | 0.938    | 0.003*    | 0.004                  | -0.002                 | 0.001                   | 0.053                  | 0.049                  | 99.4    |
| 0.5      | $R_{\perp\perp}$ | sharp   | 0.4      | 0.4   | 0.3    | 0.3                  | 147 | 0.754             | 0.000*    | 0.941    | 0.033*    | -0.003                 | -0.003                 | -0.002                  | -0.055                 | 0.002                  | 100.0   |
| 0.5      | $R_{\perp\perp}$ | sharp   | 0.4      | 0.4   | 0.6    | 0.6                  | 102 | 0.675             | 0.000*    | 0.944    | 0.111     | 0.003                  | 0.002                  | 0.001                   | 0.004                  | 0.006                  | 100.0   |
| 0.5      | $R_{\perp\perp}$ | sharp   | 0.4      | 0.4   | 0.8    | 0.8                  | 57  | 0.611             | 0.000*    | 0.934    | 0.000*    | -0.007                 | -0.005                 | -0.007                  | -0.009                 | -0.008                 | 100.0   |
| 0.5      | $R_{\perp\perp}$ | sharp   | 0.4      | 0.6   | 0.3    | 0.3                  | 136 | 0.748             | 0.000*    | 0.945    | 0.241     | 0.003                  | 0.002                  | -0.002                  | -0.008                 | 0.022                  | 100.0   |

Continued on next page

Additional simulation results for design III when working assumption A2 is violated: the true within-person correlation structure is AR(1) with correlation  $\rho$

| $\delta$ | Response         | Formula | $r_{-1}$ | $r_1$ | $\rho$ | $\rho_{\text{size}}$ | $n$ | $1 - \hat{\beta}$ | $p$ value | Coverage | $p$ value | $\text{Cor}(R, Y_0^2)$ | $\text{Cor}(R, Y_1^2)$ | $\text{Cor}(R, Y_0Y_1)$ | $\text{Cov}(Y_0, Y_2)$ | $\text{Cov}(Y_1, Y_2)$ | % Valid |
|----------|------------------|---------|----------|-------|--------|----------------------|-----|-------------------|-----------|----------|-----------|------------------------|------------------------|-------------------------|------------------------|------------------------|---------|
| 0.5      | $R_{\perp\perp}$ | sharp   | 0.4      | 0.6   | 0.6    | 0.6                  | 95  | 0.679             | 0.000*    | 0.936    | 0.001*    | -0.004                 | 0.002                  | 0.003                   | 0.010                  | 0.001                  | 100.0   |
| 0.5      | $R_{\perp\perp}$ | sharp   | 0.4      | 0.6   | 0.8    | 0.8                  | 53  | 0.614             | 0.000*    | 0.932    | 0.000*    | 0.005                  | 0.006                  | 0.006                   | 0.078                  | 0.077                  | 99.2    |
| 0.5      | $R_{\perp\perp}$ | sharp   | 0.6      | 0.4   | 0.3    | 0.3                  | 147 | 0.764             | 0.000*    | 0.943    | 0.094     | -0.004                 | 0.002                  | -0.002                  | -0.046                 | 0.006                  | 100.0   |
| 0.5      | $R_{\perp\perp}$ | sharp   | 0.6      | 0.4   | 0.6    | 0.6                  | 102 | 0.672             | 0.000*    | 0.945    | 0.209     | 0.001                  | 0.002                  | 0.002                   | 0.019                  | 0.006                  | 100.0   |
| 0.5      | $R_{\perp\perp}$ | sharp   | 0.6      | 0.4   | 0.8    | 0.8                  | 57  | 0.610             | 0.000*    | 0.934    | 0.000*    | -0.006                 | -0.004                 | -0.005                  | -0.003                 | -0.001                 | 100.0   |
| 0.5      | $R_{\perp\perp}$ | sharp   | 0.6      | 0.6   | 0.3    | 0.3                  | 136 | 0.757             | 0.000*    | 0.944    | 0.154     | 0.004                  | 0.005                  | 0.005                   | 0.063                  | 0.032                  | 100.0   |
| 0.5      | $R_{\perp\perp}$ | sharp   | 0.6      | 0.6   | 0.6    | 0.6                  | 95  | 0.674             | 0.000*    | 0.942    | 0.059     | -0.005                 | -0.005                 | -0.004                  | -0.002                 | -0.011                 | 100.0   |
| 0.5      | $R_{\perp\perp}$ | sharp   | 0.6      | 0.6   | 0.8    | 0.8                  | 53  | 0.608             | 0.000*    | 0.938    | 0.003*    | 0.001                  | 0.008                  | 0.003                   | 0.066                  | 0.079                  | 99.2    |

## References

- Robert W. Keener. *Theoretical Statistics: Topics for a Core Course*. Springer Texts in Statistics. Springer, New York, 2010. ISBN 978-0-387-93838-7.
- A. W. van der Vaart. *Asymptotic Statistics*. Cambridge Series in Statistical and Probabilistic Mathematics. Cambridge University Press, Cambridge, UK ; New York, NY, USA, 1998. ISBN 978-0-521-49603-2.
- Xi Lu, Inbal Nahum-Shani, Connie Kasari, Kevin G. Lynch, David W. Oslin, William E. Pelham, Gregory Fabiano, and Daniel Almirall. Comparing dynamic treatment regimes using repeated-measures outcomes: Modeling considerations in SMART studies. *Stat. Med.*, 35(10):1595–1615, 2016. doi: 10.1002/sim.6819.
